# Supplementary material for: Mitochondrial DNA mosaicism in human normal somatic cells
Source: Research Square preprint supplement (doi:10.21203/rs.3.rs-3602675/v1), 2023-11-21
Supplement: Supplementary file 1 [file 081a0dc19a78d0075aa489ca.xlsx]

## Sheet: SuppleTable_mtDNA_pop_expansion
Supplementary Table 8. Expansion of mtDNA population in simulations
The following metadata is reported for simulation result of mtDNA population expansion. In each turnover, the number of simulated cells is 10,000. PF represents population frequency (%) within the specified ranges: turnover = total number of turnover (50-7000); other columns = the ratio of cells (out of a total of 10,000) with a maximum population frequency (PF) in the range. (for example, 0<PF<5…
turnover	0<PF<5	5≤PF<10	10≤PF<15	15≤PF<20	20≤PF<25	25≤PF<30	30≤PF<35	35≤PF<40	40≤PF<45	45≤PF<50	50≤PF<55	55≤PF<60	60≤PF<65	65≤PF<70	70≤PF<75	75≤PF<80	80≤PF<85	85≤PF<90	90≤PF<95	95≤PF<100	PF=100
50	0.1555	0.8216	0.0226	0.0003	0	0	0	0	0	0	0	0	0	0	0	0	0	0	0	0	0
100	0	0.4401	0.4756	0.0766	0.007	0.0007	0	0	0	0	0	0	0	0	0	0	0	0	0	0	0
150	0	0.0704	0.5365	0.2914	0.0796	0.0172	0.0043	0.0005	0.0001	0	0	0	0	0	0	0	0	0	0	0	0
200	0	0.0071	0.2957	0.4097	0.1909	0.0657	0.0222	0.0059	0.0023	0.0004	0.0001	0	0	0	0	0	0	0	0	0	0
250	0	0.0006	0.1173	0.3759	0.2799	0.1374	0.0555	0.0222	0.0074	0.0026	0.0011	0	0.0001	0	0	0	0	0	0	0	0
300	0	0	0.0509	0.2674	0.3014	0.2028	0.099	0.0474	0.0195	0.0069	0.0036	0.0007	0.0003	0	0.0001	0	0	0	0	0	0
350	0	0	0.0189	0.173	0.2907	0.236	0.138	0.0731	0.0388	0.0174	0.0089	0.0033	0.0012	0.0006	0.0001	0	0	0	0	0	0
400	0	0	0.0062	0.1098	0.2458	0.2487	0.168	0.1047	0.0594	0.0298	0.0137	0.0083	0.0034	0.0016	0.0005	0.0001	0	0	0	0	0
450	0	0	0.0024	0.064	0.1974	0.2432	0.1948	0.1205	0.0851	0.0463	0.0233	0.012	0.006	0.0035	0.0009	0.0004	0.0002	0	0	0	0
500	0	0	0.0005	0.0354	0.1493	0.2196	0.2119	0.1497	0.1003	0.0619	0.0344	0.0186	0.0086	0.0055	0.0023	0.0014	0.0004	0.0002	0	0	0
550	0	0	0.0004	0.0192	0.1131	0.1989	0.2119	0.1603	0.114	0.0749	0.0465	0.0276	0.0158	0.0085	0.0043	0.0028	0.0014	0.0003	0.0001	0	0
600	0	0	0.0001	0.0115	0.0832	0.1751	0.1992	0.1684	0.1305	0.0877	0.0565	0.0364	0.0214	0.0146	0.0075	0.0048	0.0019	0.0006	0.0006	0	0
650	0	0	0	0.0067	0.0594	0.1498	0.19	0.1737	0.1357	0.0963	0.0722	0.0449	0.0294	0.0177	0.0109	0.0065	0.0041	0.0023	0.0003	0.0001	0
700	0	0	0	0.0042	0.0448	0.1235	0.1718	0.167	0.15	0.1114	0.0822	0.0556	0.0341	0.0225	0.0159	0.0076	0.0054	0.0025	0.0012	0.0003	0
750	0	0	0	0.0028	0.0324	0.105	0.1537	0.1614	0.1545	0.1214	0.0901	0.0627	0.044	0.0277	0.0191	0.0111	0.0082	0.0028	0.0019	0.0011	0.0001
800	0	0	0.0001	0.0016	0.0228	0.0884	0.1415	0.1601	0.1478	0.1279	0.0973	0.07	0.0499	0.0351	0.0243	0.0125	0.0119	0.0043	0.0033	0.0009	0.0003
850	0	0	0	0.0012	0.0171	0.0671	0.1304	0.1589	0.1508	0.1233	0.1014	0.0794	0.0548	0.0415	0.0291	0.0194	0.0114	0.0083	0.0033	0.0018	0.0008
900	0	0	0	0.0004	0.0108	0.0603	0.1148	0.1506	0.1417	0.1341	0.1038	0.0839	0.0596	0.0465	0.0364	0.0222	0.0157	0.0101	0.0057	0.0023	0.0011
950	0	0	0	0.0009	0.0103	0.0471	0.0981	0.1372	0.1451	0.1318	0.1146	0.0842	0.0656	0.0532	0.0403	0.0289	0.0184	0.0119	0.0074	0.0035	0.0015
1000	0	0	0	0.0001	0.0072	0.0381	0.0828	0.1327	0.1384	0.1313	0.1149	0.0947	0.0738	0.0565	0.0445	0.0318	0.0243	0.0119	0.0092	0.0056	0.0022
1050	0	0	0	0	0.0043	0.0313	0.0762	0.1172	0.1351	0.1306	0.1216	0.0956	0.0761	0.0636	0.0471	0.0369	0.025	0.0164	0.0114	0.0082	0.0034
1100	0	0	0	0.0003	0.0032	0.0244	0.0617	0.1107	0.133	0.127	0.1231	0.102	0.0836	0.0667	0.049	0.0358	0.0306	0.0199	0.0134	0.0111	0.0045
1150	0	0	0	0	0.0016	0.0203	0.0569	0.1016	0.1208	0.1307	0.1217	0.1042	0.0809	0.0697	0.0541	0.0457	0.0322	0.0239	0.0153	0.0124	0.008
1200	0	0	0	0	0.002	0.0169	0.0475	0.0965	0.1143	0.1224	0.1287	0.1019	0.0842	0.073	0.0571	0.0461	0.0362	0.0285	0.0205	0.0136	0.0106
1250	0	0	0	0	0.0014	0.0125	0.0448	0.086	0.1122	0.1217	0.1226	0.1044	0.0906	0.07	0.062	0.051	0.0374	0.0311	0.0215	0.017	0.0138
1300	0	0	0	0	0.0013	0.0099	0.0389	0.0818	0.1027	0.1134	0.1271	0.1082	0.0883	0.0751	0.0661	0.0503	0.0431	0.0309	0.0276	0.0177	0.0176
1350	0	0	0	0	0.001	0.0085	0.0348	0.0661	0.099	0.1147	0.1266	0.1081	0.0919	0.0764	0.0648	0.0527	0.0482	0.0369	0.0281	0.0196	0.0226
1400	0	0	0	0	0.0003	0.0075	0.029	0.0609	0.0909	0.1071	0.1187	0.1166	0.0962	0.0784	0.0699	0.0523	0.0483	0.0435	0.0299	0.0237	0.0268
1450	0	0	0	0.0001	0.0004	0.006	0.0254	0.0557	0.0867	0.101	0.1196	0.112	0.0973	0.0827	0.0651	0.057	0.051	0.0446	0.0373	0.0266	0.0315
1500	0	0	0	0	0.0004	0.0067	0.0216	0.0505	0.0743	0.0992	0.1168	0.1084	0.0996	0.0852	0.0724	0.0602	0.0549	0.043	0.0379	0.0302	0.0387
1550	0	0	0	0	0.0004	0.0055	0.0184	0.0502	0.067	0.0882	0.1248	0.1098	0.096	0.0814	0.0688	0.0685	0.0523	0.0496	0.0398	0.0332	0.0461
1600	0	0	0	0	0.0001	0.0044	0.0153	0.0432	0.0695	0.0874	0.1192	0.1007	0.0976	0.0894	0.0682	0.0667	0.0598	0.0486	0.042	0.0329	0.055
1650	0	0	0	0	0.0001	0.0029	0.0152	0.0387	0.0663	0.0825	0.1164	0.1062	0.0946	0.0839	0.0743	0.0638	0.0615	0.0467	0.0458	0.0377	0.0634
1700	0	0	0	0	0	0.0016	0.0134	0.0383	0.0585	0.0809	0.1215	0.0988	0.0982	0.0818	0.0713	0.0673	0.0572	0.0555	0.0449	0.0371	0.0737
1750	0	0	0	0	0.0001	0.0023	0.0121	0.0356	0.052	0.0714	0.1197	0.1066	0.0942	0.0867	0.0713	0.0678	0.0584	0.0526	0.0488	0.037	0.0834
1800	0	0	0	0	0	0.0024	0.0104	0.0303	0.0489	0.0687	0.1105	0.1089	0.095	0.0872	0.0771	0.0671	0.0596	0.0516	0.0511	0.0396	0.0916
1850	0	0	0	0	0	0.0023	0.009	0.0302	0.0448	0.0664	0.1064	0.1032	0.0962	0.0864	0.0748	0.0683	0.0618	0.0552	0.0515	0.0433	0.1002
1900	0	0	0	0	0	0.0021	0.0068	0.0256	0.0458	0.06	0.1027	0.1043	0.093	0.0858	0.0775	0.0706	0.0628	0.0572	0.0517	0.0435	0.1106
1950	0	0	0	0	0	0.0019	0.0063	0.0232	0.0402	0.0607	0.0993	0.0976	0.0955	0.0853	0.0759	0.0737	0.06	0.0575	0.0545	0.0467	0.1217
2000	0	0	0	0	0.0001	0.0008	0.0058	0.0223	0.0415	0.0525	0.1025	0.0947	0.0894	0.0856	0.0738	0.0703	0.067	0.0601	0.0529	0.0491	0.1316
2050	0	0	0	0	0	0.0007	0.0059	0.0213	0.0346	0.0489	0.1051	0.0935	0.0831	0.0862	0.0792	0.0709	0.0621	0.0586	0.0569	0.0498	0.1432
2100	0	0	0	0	0	0.0007	0.0047	0.0183	0.0355	0.0477	0.0991	0.0908	0.089	0.0821	0.0746	0.0715	0.0615	0.0614	0.0569	0.049	0.1572
2150	0	0	0	0	0	0.0003	0.005	0.0187	0.0284	0.0453	0.0949	0.0939	0.0883	0.0769	0.0701	0.0683	0.0711	0.0603	0.0588	0.0518	0.1679
2200	0	0	0	0	0	0.0004	0.0038	0.0155	0.0294	0.045	0.0915	0.093	0.0834	0.0795	0.0745	0.0645	0.0674	0.0609	0.0594	0.0515	0.1803
2250	0	0	0	0	0	0.0001	0.0038	0.0145	0.0263	0.0423	0.093	0.0865	0.0863	0.0742	0.0757	0.0697	0.0665	0.0605	0.0575	0.0498	0.1933
2300	0	0	0	0	0	0.0002	0.0023	0.0136	0.0253	0.0371	0.0889	0.0909	0.0836	0.076	0.0741	0.068	0.0637	0.0641	0.058	0.0479	0.2063
2350	0	0	0	0	0	0	0.0019	0.012	0.0246	0.0349	0.088	0.081	0.0842	0.0804	0.0712	0.0676	0.0651	0.0609	0.0584	0.0504	0.2194
2400	0	0	0	0	0	0.0003	0.002	0.0116	0.0229	0.034	0.0852	0.0823	0.0772	0.0792	0.071	0.0631	0.0691	0.0579	0.0599	0.0527	0.2316
2450	0	0	0	0	0	0.0003	0.002	0.0115	0.0214	0.0278	0.0859	0.0858	0.0722	0.0743	0.0699	0.0676	0.0666	0.0586	0.0574	0.0532	0.2455
2500	0	0	0	0	0	0.0001	0.0019	0.0108	0.0188	0.0264	0.0819	0.0809	0.0752	0.0737	0.0692	0.0659	0.0678	0.0595	0.0567	0.0518	0.2594
2550	0	0	0	0	0	0.0001	0.0014	0.0085	0.0203	0.0248	0.0793	0.0737	0.0781	0.0725	0.0721	0.0674	0.0619	0.0611	0.0541	0.0519	0.2728
2600	0	0	0	0	0	0.0001	0.0012	0.0088	0.0161	0.0233	0.0764	0.0794	0.0764	0.0695	0.0669	0.0666	0.0635	0.0578	0.0575	0.0493	0.2872
2650	0	0	0	0	0	0.0002	0.0008	0.0074	0.0161	0.0244	0.074	0.0745	0.0743	0.0679	0.0697	0.0649	0.0631	0.0586	0.0534	0.0503	0.3004
2700	0	0	0	0	0.0001	0.0002	0.0009	0.0081	0.0144	0.021	0.0748	0.0711	0.0708	0.0677	0.0693	0.0666	0.061	0.0559	0.0537	0.0507	0.3137
2750	0	0	0	0	0.0001	0	0.0011	0.0074	0.0135	0.0182	0.076	0.0699	0.0672	0.0663	0.0657	0.0662	0.064	0.0565	0.0524	0.0483	0.3272
2800	0	0	0	0	0	0	0.001	0.0072	0.0122	0.0168	0.0682	0.0709	0.0675	0.0656	0.0626	0.0657	0.0625	0.0585	0.0549	0.0471	0.3393
2850	0	0	0	0	0	0.0002	0.001	0.0063	0.0114	0.0165	0.0664	0.0672	0.066	0.0631	0.0633	0.0624	0.0659	0.0553	0.0533	0.0506	0.3511
2900	0	0	0	0	0	0	0.001	0.005	0.0109	0.0161	0.0652	0.0685	0.0672	0.0595	0.0626	0.0591	0.0588	0.0565	0.0554	0.0523	0.3619
2950	0	0	0	0	0	0.0001	0.0003	0.0049	0.0101	0.0161	0.0643	0.0631	0.0625	0.063	0.0576	0.0637	0.0554	0.058	0.0528	0.0545	0.3736
3000	0	0	0	0	0	0	0.0003	0.0039	0.0095	0.0131	0.0653	0.0634	0.0585	0.062	0.0626	0.0569	0.0555	0.0528	0.0545	0.0545	0.3872
3050	0	0	0	0	0	0	0.0002	0.0035	0.0078	0.013	0.0638	0.0624	0.0576	0.0601	0.0615	0.0567	0.0535	0.0517	0.0539	0.0531	0.4012
3100	0	0	0	0	0	0	0.0001	0.0042	0.0085	0.0125	0.0626	0.0601	0.0537	0.0597	0.0562	0.0582	0.0517	0.0549	0.0501	0.052	0.4155
3150	0	0	0	0	0	0	0.0001	0.0027	0.0086	0.0111	0.0588	0.0574	0.0584	0.0596	0.0544	0.0559	0.0521	0.0507	0.0529	0.0489	0.4284
3200	0	0	0	0	0	0	0.0003	0.003	0.0072	0.0099	0.0572	0.0603	0.0588	0.0529	0.0557	0.0526	0.0548	0.0475	0.0507	0.0476	0.4415
3250	0	0	0	0	0	0	0.0004	0.0027	0.0068	0.0087	0.0586	0.0572	0.0549	0.0563	0.0536	0.0493	0.0513	0.0497	0.0496	0.0467	0.4542
3300	0	0	0	0	0	0	0.0002	0.0027	0.0049	0.0094	0.0565	0.055	0.0546	0.0536	0.0546	0.0519	0.0509	0.0454	0.0507	0.0444	0.4652
3350	0	0	0	0	0	0	0.0004	0.0027	0.0053	0.0074	0.0539	0.0552	0.0514	0.0495	0.0549	0.0546	0.0489	0.0459	0.0464	0.0485	0.475
3400	0	0	0	0	0	0	0.0002	0.0031	0.0046	0.0068	0.0564	0.051	0.0493	0.055	0.0511	0.0484	0.0495	0.0457	0.044	0.0484	0.4865
3450	0	0	0	0	0	0	0.0001	0.0027	0.0041	0.0063	0.0566	0.05	0.0503	0.0514	0.049	0.0482	0.0455	0.047	0.0458	0.0442	0.4988
3500	0	0	0	0	0	0	0.0001	0.0025	0.004	0.0068	0.0533	0.0525	0.0465	0.048	0.0498	0.0504	0.0428	0.0438	0.0468	0.0429	0.5098
3550	0	0	0	0	0	0	0	0.0019	0.0037	0.0056	0.0503	0.049	0.0485	0.0463	0.0487	0.0498	0.0449	0.0443	0.0454	0.0395	0.5221
3600	0	0	0	0	0	0	0	0.0015	0.0029	0.0057	0.0466	0.0473	0.0494	0.0464	0.0507	0.0441	0.0452	0.0439	0.0435	0.0401	0.5327
3650	0	0	0	0	0	0	0.0001	0.0012	0.0036	0.0047	0.0463	0.049	0.0471	0.0422	0.0489	0.0416	0.0449	0.0446	0.0431	0.0394	0.5433
3700	0	0	0	0	0	0	0	0.0017	0.0029	0.0044	0.0473	0.0477	0.0465	0.0437	0.0394	0.0448	0.0426	0.0455	0.0404	0.0399	0.5532
3750	0	0	0	0	0	0	0.0001	0.0013	0.0027	0.0042	0.0471	0.0464	0.0445	0.0419	0.0414	0.0433	0.0391	0.0444	0.0395	0.0401	0.564
3800	0	0	0	0	0	0	0.0001	0.0015	0.0031	0.0032	0.0464	0.0451	0.0403	0.0446	0.0411	0.0378	0.0384	0.0447	0.0411	0.0377	0.5749
3850	0	0	0	0	0	0	0.0002	0.0012	0.002	0.0032	0.0465	0.0419	0.0428	0.0403	0.0425	0.0404	0.0362	0.0399	0.0385	0.0401	0.5843
3900	0	0	0	0	0	0	0	0.0014	0.0021	0.0031	0.0449	0.0417	0.0394	0.0437	0.0384	0.0405	0.0384	0.0389	0.0349	0.0392	0.5934
3950	0	0	0	0	0	0	0.0001	0.0012	0.0021	0.0028	0.0422	0.0405	0.0431	0.0423	0.0355	0.0385	0.0396	0.0369	0.0332	0.0379	0.6041
4000	0	0	0	0	0	0	0.0002	0.0009	0.002	0.0026	0.0414	0.0419	0.0402	0.0365	0.0385	0.0366	0.039	0.0361	0.0355	0.0362	0.6124
4050	0	0	0	0	0	0	0	0.0008	0.002	0.0024	0.0391	0.0402	0.037	0.0412	0.0369	0.034	0.039	0.0368	0.0351	0.0334	0.6221
4100	0	0	0	0	0	0	0.0001	0.001	0.0014	0.0019	0.039	0.0375	0.0395	0.0356	0.0357	0.0359	0.0396	0.0335	0.0357	0.0335	0.6301
4150	0	0	0	0	0	0	0	0.0004	0.002	0.0024	0.0356	0.0376	0.0363	0.0355	0.0373	0.0354	0.0358	0.0359	0.0347	0.032	0.6391
4200	0	0	0	0	0	0	0.0001	0.0002	0.0019	0.0018	0.0375	0.0348	0.0344	0.0349	0.0362	0.0382	0.0319	0.0354	0.0339	0.0335	0.6453
4250	0	0	0	0	0	0	0	0.0003	0.0011	0.0019	0.0343	0.0345	0.0356	0.0352	0.0344	0.0361	0.0349	0.0319	0.0353	0.0309	0.6536
4300	0	0	0	0	0	0	0	0.0003	0.0009	0.0015	0.0344	0.0356	0.0342	0.031	0.033	0.0349	0.0347	0.0346	0.0313	0.0323	0.6613
4350	0	0	0	0	0	0	0.0001	0.0004	0.0005	0.0018	0.0382	0.0292	0.0323	0.0333	0.0333	0.0319	0.0337	0.0321	0.0316	0.0333	0.6683
4400	0	0	0	0	0	0	0	0.0001	0.001	0.0016	0.0318	0.0312	0.0346	0.0317	0.0325	0.0293	0.0324	0.0342	0.0314	0.031	0.6772
4450	0	0	0	0	0	0	0	0.0001	0.0004	0.0011	0.0321	0.032	0.0308	0.0302	0.0324	0.0295	0.0334	0.0308	0.0321	0.0302	0.6849
4500	0	0	0	0	0	0	0	0	0.0007	0.0012	0.0316	0.0293	0.0321	0.031	0.0304	0.0305	0.0278	0.0319	0.0306	0.0289	0.694
4550	0	0	0	0	0	0	0	0.0001	0.0006	0.0008	0.0301	0.0324	0.0299	0.0298	0.0295	0.0295	0.0298	0.0276	0.0311	0.0281	0.7007
4600	0	0	0	0	0	0	0	0.0002	0.0005	0.0011	0.0325	0.0285	0.0276	0.028	0.0292	0.0301	0.0301	0.0271	0.0292	0.0288	0.7071
4650	0	0	0	0	0	0	0	0.0003	0.0005	0.0008	0.0291	0.028	0.0272	0.0311	0.027	0.03	0.0268	0.0296	0.0274	0.0282	0.714
4700	0	0	0	0	0	0	0	0.0002	0.0008	0.0004	0.0285	0.0255	0.0267	0.0287	0.0312	0.0265	0.0283	0.0278	0.0266	0.0274	0.7214
4750	0	0	0	0	0	0	0	0	0.0008	0.0008	0.0281	0.0264	0.0254	0.0267	0.0295	0.0267	0.0276	0.0283	0.0265	0.0236	0.7296
4800	0	0	0	0	0	0	0	0.0001	0.0003	0.0011	0.0279	0.0253	0.0257	0.0247	0.0268	0.0287	0.0268	0.0258	0.0262	0.0246	0.736
4850	0	0	0	0	0	0	0	0.0003	0.0001	0.0005	0.0256	0.025	0.0274	0.0239	0.027	0.0239	0.03	0.0264	0.023	0.0242	0.7427
4900	0	0	0	0	0	0	0	0.0001	0.0004	0.0008	0.0241	0.0253	0.0254	0.0267	0.0257	0.0234	0.0253	0.0261	0.0244	0.0243	0.748
4950	0	0	0	0	0	0	0	0.0001	0.0002	0.0004	0.0242	0.0256	0.0229	0.0244	0.0247	0.0261	0.022	0.026	0.0265	0.023	0.7539
5000	0	0	0	0	0	0	0	0.0002	0.0003	0.0004	0.0203	0.0259	0.0218	0.0252	0.0249	0.0225	0.0254	0.0266	0.0236	0.0223	0.7606
5050	0	0	0	0	0	0	0	0	0.0005	0.0008	0.023	0.022	0.0238	0.0204	0.0232	0.0248	0.0223	0.0253	0.0246	0.0241	0.7652
5100	0	0	0	0	0	0	0	0.0003	0.0002	0.0002	0.023	0.0217	0.0243	0.0216	0.021	0.0224	0.0235	0.0235	0.0259	0.0219	0.7705
5150	0	0	0	0	0	0	0	0.0003	0.0004	0.0004	0.0216	0.0202	0.0238	0.0238	0.0207	0.0205	0.0217	0.0243	0.0236	0.022	0.7767
5200	0	0	0	0	0	0	0	0.0001	0.0006	0.0007	0.0209	0.0228	0.0208	0.0197	0.0225	0.0218	0.0242	0.0203	0.0224	0.0212	0.782
5250	0	0	0	0	0	0	0	0.0002	0.0003	0.0006	0.0202	0.0222	0.0199	0.02	0.0204	0.0231	0.0227	0.0205	0.0207	0.0217	0.7875
5300	0	0	0	0	0	0	0	0.0002	0.0003	0.0006	0.0231	0.0194	0.0181	0.0181	0.0217	0.0229	0.0186	0.0229	0.0189	0.0225	0.7927
5350	0	0	0	0	0	0	0	0.0001	0.0003	0.0007	0.0179	0.0225	0.0215	0.0185	0.0183	0.0209	0.021	0.0211	0.0172	0.0222	0.7978
5400	0	0	0	0	0	0	0.0001	0	0.0003	0.0006	0.0188	0.0191	0.0189	0.02	0.0203	0.0186	0.0209	0.0203	0.0185	0.0214	0.8022
5450	0	0	0	0	0	0	0	0.0002	0.0002	0.0006	0.0185	0.0181	0.0179	0.0196	0.0206	0.0184	0.0201	0.0189	0.0187	0.0196	0.8086
5500	0	0	0	0	0	0	0	0.0001	0.0004	0.0006	0.0166	0.0173	0.022	0.0172	0.0187	0.0171	0.0208	0.018	0.0196	0.0185	0.8131
5550	0	0	0	0	0	0	0	0.0002	0.0001	0.0005	0.0191	0.0168	0.0165	0.0168	0.0191	0.0219	0.017	0.0184	0.0193	0.0166	0.8177
5600	0	0	0	0	0	0	0	0.0002	0.0001	0.0008	0.0176	0.0168	0.0182	0.0178	0.0168	0.0186	0.0178	0.0199	0.0166	0.017	0.8218
5650	0	0	0	0	0	0	0	0.0001	0.0001	0.0003	0.0167	0.0174	0.018	0.0176	0.0168	0.0169	0.0193	0.0188	0.0159	0.0165	0.8256
5700	0	0	0	0	0	0	0	0.0001	0	0.0001	0.0164	0.0176	0.0163	0.0168	0.0167	0.0164	0.0184	0.0178	0.0167	0.0175	0.8292
5750	0	0	0	0	0	0	0	0.0001	0.0001	0.0003	0.0144	0.0166	0.0166	0.0158	0.016	0.017	0.0171	0.0197	0.0164	0.0163	0.8336
5800	0	0	0	0	0	0	0	0.0001	0	0.0002	0.0147	0.0133	0.0161	0.0162	0.0175	0.0152	0.0181	0.0175	0.0162	0.0175	0.8374
5850	0	0	0	0	0	0	0	0	0.0002	0.0002	0.0152	0.0161	0.014	0.0142	0.0161	0.0161	0.0173	0.0152	0.018	0.0173	0.8401
5900	0	0	0	0	0	0	0	0.0001	0.0001	0.0004	0.0159	0.0134	0.0127	0.016	0.0168	0.015	0.0163	0.0155	0.0162	0.0179	0.8437
5950	0	0	0	0	0	0	0	0.0001	0	0.0003	0.0146	0.0138	0.015	0.0151	0.0156	0.014	0.0154	0.0148	0.0166	0.0178	0.8469
6000	0	0	0	0	0	0	0	0.0001	0.0003	0.0002	0.0127	0.0161	0.0137	0.0131	0.017	0.0127	0.0148	0.0154	0.0154	0.0174	0.8511
6050	0	0	0	0	0	0	0	0.0001	0.0001	0.0002	0.0117	0.0139	0.0166	0.0139	0.0137	0.0149	0.0143	0.0157	0.0136	0.0155	0.8558
6100	0	0	0	0	0	0	0	0	0	0.0005	0.0128	0.0131	0.0128	0.013	0.0155	0.0153	0.0144	0.0164	0.0124	0.0127	0.8611
6150	0	0	0	0	0	0	0	0.0001	0.0002	0.0002	0.013	0.0096	0.0138	0.0148	0.0147	0.0142	0.015	0.0129	0.013	0.0143	0.8642
6200	0	0	0	0	0	0	0	0	0.0001	0.0003	0.0119	0.0117	0.0126	0.0134	0.0138	0.0138	0.0162	0.0117	0.0124	0.0148	0.8673
6250	0	0	0	0	0	0	0	0	0	0.0003	0.0116	0.0134	0.0117	0.0117	0.0136	0.0124	0.015	0.0121	0.0141	0.0135	0.8706
6300	0	0	0	0	0	0	0	0	0.0001	0	0.011	0.011	0.014	0.0124	0.0126	0.0127	0.0125	0.0127	0.0132	0.0131	0.8747
6350	0	0	0	0	0	0	0	0	0	0.0002	0.011	0.0113	0.0122	0.0126	0.014	0.0122	0.0117	0.0118	0.0114	0.0135	0.8781
6400	0	0	0	0	0	0	0	0.0001	0	0.0003	0.0109	0.0122	0.0119	0.0107	0.0125	0.0122	0.0126	0.0113	0.0114	0.0118	0.8821
6450	0	0	0	0	0	0	0	0.0001	0	0.0001	0.012	0.0115	0.0115	0.0083	0.0128	0.0135	0.0109	0.0129	0.0112	0.0102	0.885
6500	0	0	0	0	0	0	0	0	0.0002	0.0001	0.012	0.0122	0.0098	0.0107	0.0104	0.0131	0.0115	0.0109	0.0108	0.0101	0.8882
6550	0	0	0	0	0	0	0	0	0.0001	0.0003	0.0114	0.0114	0.0113	0.0094	0.0097	0.0124	0.011	0.0117	0.0109	0.0095	0.8909
6600	0	0	0	0	0	0	0	0	0	0.0001	0.0107	0.0107	0.0108	0.0094	0.0104	0.0108	0.0108	0.0122	0.0117	0.0093	0.8931
6650	0	0	0	0	0	0	0	0	0.0001	0	0.0112	0.0106	0.0104	0.0092	0.0107	0.0091	0.011	0.0123	0.011	0.0089	0.8955
6700	0	0	0	0	0	0	0	0	0	0.0001	0.0092	0.0118	0.0103	0.0098	0.0094	0.0097	0.0101	0.0107	0.0116	0.0095	0.8978
6750	0	0	0	0	0	0	0	0	0	0.0001	0.0097	0.0095	0.01	0.0098	0.0096	0.0095	0.0105	0.0104	0.0091	0.0113	0.9005
6800	0	0	0	0	0	0	0	0	0.0001	0	0.0092	0.009	0.0107	0.0099	0.009	0.0104	0.008	0.0104	0.0093	0.0104	0.9036
6850	0	0	0	0	0	0	0	0	0	0.0001	0.0088	0.0084	0.0099	0.0095	0.0094	0.0103	0.0094	0.0086	0.0099	0.0097	0.906
6900	0	0	0	0	0	0	0	0.0001	0	0.0002	0.0067	0.0098	0.0099	0.0094	0.0096	0.0097	0.0082	0.0106	0.0091	0.0083	0.9084
6950	0	0	0	0	0	0	0	0	0.0001	0	0.0074	0.0103	0.0088	0.0094	0.0102	0.0089	0.0076	0.0096	0.0088	0.0086	0.9103
7000	0	0	0	0	0	0	0	0	0	0.0001	0.0082	0.0086	0.0097	0.0085	0.009	0.0088	0.008	0.0089	0.0092	0.0085	0.9125
