# Supplementary material for: Mitochondrial DNA mosaicism in human normal somatic cells
Source: Research Square preprint supplement (doi:10.21203/rs.3.rs-3602675/v1), 2023-11-21
Supplement: Supplementary file 2 [file 345841e41ef46d56d242e77f.xlsx]

## Sheet: Sheet1
Supplementary Table 1. Summarized WGS information of individuals
The following metadata is reported for each individual: tissue = tissue; patientID = patient identifier; normal_cloneN = the number of normal clone of the individual; adenoma_cloneN = the number of adenoma clone of the individual; tumorN = the number of bulk tumor of the individual; bulk_bloodN = the number of bulk blood of the individual; total normal_cloneN = the total number of normal clone; t…
tissue	patientID	normal_cloneN	adenoma_cloneN	tumorN	bulk_bloodN	total normal_cloneN	total adenoma_cloneN	total tumorN	total bulk_bloodN
Colorectal epithelium	HC01	23	0	1	1	431	12	19	20
	HC02	22	0	1	1
	HC03	24	0	1	1
	HC04	23	0	1	1
	HC05	24	0	1	1
	HC06	22	0	1	1
	HC08	23	0	1	1
	HC09	21	0	1	1
	HC10	20	0	1	1
	HC12	22	0	1	1
	HC13	22	0	1	1
	HC14	19	0	1	1
	HC15	23	0	1	1
	HC16	18	0	1	1
	HC17	14	0	1	1
	HC18	17	0	1	1
	HC19	23	0	1	1
	HC20	22	0	1	1
	HC21	23	0	1	1
	HC22	0	12	0	1
	SA03	26	0	0	0
Fibroblast	DB10	39	0	0	1	334	0	0	7
	DB2	27	0	0	1
	DB3	43	0	0	1
	DB5	28	0	0	1
	DB6	115	0	0	1
	DB8	47	0	0	1
	DB9	35	0	0	1
HSC	BM	137	0	0	1	1331	0	0	1
	KX001	398	0	0	0
	KX004	432	0	0	0
	KX008	364	0	0	0
total						2096	12	19	28
