# Supplementary material for: Mitochondrial DNA mosaicism in human normal somatic cells
Source: Research Square preprint supplement (doi:10.21203/rs.3.rs-3602675/v1), 2023-11-21
Supplement: Supplementary file 3 [file 401d076169057a4679c78315.xlsx]

## Sheet: SuppleTable_mtDNA_mut_expansion
Supplementary Table 9. Expansion of mtDNA variant in simulations
The following metadata is reported for simulation result of mtDNA variant expansion. In each turnover, the number of simulated cells is 10,000. VAF represents variant allele frequency (%) within the specified ranges: turnover = total number of turnover (50-7000); other columns = the ratio of cells (out of a total of 10,000) with a maximum variant allele frequency (VAF) in the range. (for example,…
turnover	0<VAF<5	5≤VAF<10	10≤VAF<15	15≤VAF<20	20≤VAF<25	25≤VAF<30	30≤VAF<35	35≤VAF<40	40≤VAF<45	45≤VAF<50	50≤VAF<55	55≤VAF<60	60≤VAF<65	65≤VAF<70	70≤VAF<75	75≤VAF<80	80≤VAF<85	85≤VAF<90	90≤VAF<95	95≤VAF<100	VAF=100
50	0.9828	0.0171	0.0001	0	0	0	0	0	0	0	0	0	0	0	0	0	0	0	0	0	0
100	0.8109	0.176	0.0118	0.001	0.0003	0	0	0	0	0	0	0	0	0	0	0	0	0	0	0	0
150	0.5858	0.3398	0.0613	0.0105	0.0022	0.0003	0.0001	0	0	0	0	0	0	0	0	0	0	0	0	0	0
200	0.3998	0.42	0.1314	0.0361	0.0094	0.0025	0.0005	0	0.0002	0	0.0001	0	0	0	0	0	0	0	0	0	0
250	0.2747	0.4358	0.1876	0.0667	0.0236	0.0081	0.0026	0.0006	0	0	0.0002	0	0	0.0001	0	0	0	0	0	0	0
300	0.1942	0.4008	0.2404	0.0938	0.0428	0.0164	0.0073	0.0032	0.0007	0.0002	0.0001	0	0.0001	0	0	0	0	0	0	0	0
350	0.1382	0.3674	0.2526	0.1315	0.059	0.0289	0.0126	0.0056	0.0028	0.001	0.0002	0.0001	0.0001	0	0	0	0	0	0	0	0
400	0.0989	0.3189	0.2613	0.1584	0.0831	0.0387	0.0232	0.0099	0.0043	0.0013	0.001	0.0009	0	0.0001	0	0	0	0	0	0	0
450	0.0776	0.2721	0.2605	0.1727	0.1004	0.0537	0.0319	0.0144	0.009	0.0051	0.0011	0.0007	0.0006	0.0002	0	0	0	0	0	0	0
500	0.0597	0.2329	0.2528	0.1788	0.1159	0.0713	0.04	0.0219	0.0129	0.0068	0.0038	0.0017	0.001	0.0003	0.0002	0	0	0	0	0	0
550	0.0459	0.2033	0.2348	0.189	0.1279	0.0839	0.0486	0.0289	0.0141	0.0113	0.006	0.0039	0.0012	0.0006	0.0004	0.0002	0	0	0	0	0
600	0.0352	0.1742	0.2186	0.1934	0.14	0.0914	0.0606	0.0326	0.0213	0.0137	0.0071	0.0057	0.0035	0.0013	0.0005	0.0006	0.0001	0.0002	0	0	0
650	0.0258	0.147	0.2033	0.1903	0.1466	0.0999	0.0729	0.0447	0.0281	0.0149	0.0111	0.0065	0.004	0.0025	0.0007	0.001	0.0005	0	0.0001	0.0001	0
700	0.0209	0.1251	0.1856	0.1868	0.151	0.1148	0.0769	0.0498	0.0335	0.0228	0.0119	0.0072	0.0063	0.0033	0.0022	0.0012	0	0.0003	0.0002	0.0002	0
750	0.0178	0.1064	0.1659	0.18	0.1501	0.123	0.0851	0.0573	0.041	0.0285	0.0173	0.0107	0.0073	0.004	0.0031	0.0008	0.0007	0.0006	0	0.0004	0
800	0.0162	0.0908	0.1527	0.164	0.155	0.122	0.0987	0.0641	0.0446	0.0321	0.0223	0.0149	0.0093	0.0056	0.0036	0.002	0.001	0.0004	0.0004	0.0002	0.0001
850	0.0141	0.0786	0.1412	0.1608	0.1521	0.1268	0.0947	0.0707	0.0534	0.0358	0.0241	0.0175	0.0109	0.0081	0.0054	0.0034	0.0013	0.0003	0.0003	0.0003	0.0002
900	0.0104	0.0685	0.1304	0.1516	0.1465	0.1278	0.1028	0.0755	0.0602	0.038	0.0302	0.0214	0.0131	0.0084	0.0062	0.0047	0.0022	0.0009	0.0005	0.0005	0.0002
950	0.0087	0.0589	0.1167	0.1417	0.139	0.1309	0.1115	0.0795	0.0609	0.0466	0.0327	0.0247	0.0183	0.0109	0.0076	0.0052	0.003	0.0021	0.0005	0.0002	0.0004
1000	0.0081	0.0513	0.1021	0.1385	0.1375	0.1265	0.1045	0.0911	0.0664	0.0525	0.0346	0.0268	0.0208	0.0135	0.01	0.007	0.0036	0.003	0.0011	0.0007	0.0004
1050	0.006	0.0475	0.0982	0.1219	0.1425	0.1167	0.1094	0.0902	0.0739	0.0522	0.0429	0.0302	0.021	0.0165	0.0118	0.0074	0.005	0.0036	0.0016	0.001	0.0005
1100	0.0049	0.0456	0.0836	0.1122	0.126	0.1331	0.1101	0.0914	0.0775	0.0542	0.0466	0.0342	0.0263	0.0166	0.0148	0.0076	0.0068	0.0049	0.0011	0.0018	0.0007
1150	0.0064	0.0362	0.0782	0.1057	0.1226	0.121	0.1149	0.0957	0.0783	0.06	0.0508	0.0356	0.0292	0.0208	0.0161	0.0105	0.0066	0.0054	0.0034	0.0019	0.0007
1200	0.0036	0.0349	0.0687	0.1062	0.1144	0.1162	0.113	0.0972	0.0823	0.0642	0.0508	0.0391	0.0331	0.022	0.0192	0.0122	0.009	0.0063	0.0041	0.0023	0.0012
1250	0.0049	0.0295	0.0624	0.0964	0.1129	0.1158	0.1082	0.1005	0.0836	0.067	0.0552	0.0409	0.0365	0.0251	0.0215	0.0124	0.0109	0.0064	0.0057	0.0025	0.0017
1300	0.0035	0.0248	0.0626	0.086	0.1072	0.1154	0.1104	0.0946	0.0833	0.0736	0.059	0.048	0.0362	0.0268	0.0235	0.0152	0.0102	0.0078	0.0063	0.0032	0.0024
1350	0.003	0.0233	0.0546	0.0795	0.099	0.1095	0.1079	0.1048	0.0812	0.0733	0.0669	0.0475	0.0399	0.0317	0.0246	0.0188	0.0125	0.0085	0.0066	0.0038	0.0031
1400	0.0023	0.0212	0.0505	0.0777	0.0901	0.1083	0.102	0.0977	0.0852	0.0817	0.0661	0.0531	0.0412	0.0324	0.0274	0.0197	0.0154	0.0107	0.0077	0.0058	0.0038
1450	0.0024	0.0178	0.0433	0.0725	0.0887	0.0971	0.1057	0.0992	0.0906	0.0782	0.0679	0.0577	0.0459	0.0313	0.0311	0.0199	0.0155	0.0134	0.0094	0.0071	0.0053
1500	0.0028	0.0174	0.0379	0.0646	0.0852	0.0932	0.103	0.1004	0.0853	0.0844	0.0748	0.0583	0.0441	0.036	0.0302	0.0235	0.0194	0.0136	0.0118	0.0075	0.0066
1550	0.0014	0.0158	0.0372	0.0604	0.0782	0.0925	0.0955	0.1003	0.0931	0.0788	0.075	0.0587	0.0496	0.0403	0.0323	0.0248	0.0192	0.0172	0.0121	0.0086	0.009
1600	0.0017	0.0137	0.0364	0.0548	0.0736	0.0874	0.095	0.0969	0.0914	0.0864	0.0737	0.0608	0.0504	0.0411	0.0349	0.0256	0.0223	0.0177	0.0142	0.0114	0.0106
1650	0.0019	0.0131	0.0303	0.053	0.0728	0.0871	0.0843	0.0902	0.095	0.086	0.0773	0.0635	0.0528	0.0444	0.0358	0.0265	0.0247	0.0198	0.0157	0.012	0.0138
1700	0.002	0.0125	0.0292	0.05	0.0651	0.0795	0.0856	0.0922	0.098	0.0861	0.0739	0.0659	0.0542	0.0446	0.0351	0.0324	0.026	0.0207	0.0159	0.0146	0.0165
1750	0.0016	0.0125	0.0244	0.0454	0.0603	0.0794	0.0838	0.0971	0.0885	0.0889	0.0766	0.0645	0.0545	0.048	0.0403	0.03	0.0272	0.0222	0.0199	0.0153	0.0196
1800	0.0013	0.0093	0.0258	0.0406	0.0609	0.0699	0.0795	0.0952	0.0874	0.0851	0.0821	0.0706	0.06	0.0447	0.0442	0.0322	0.0288	0.0222	0.0219	0.0152	0.0231
1850	0.001	0.009	0.0223	0.0367	0.0577	0.0646	0.0777	0.0913	0.0858	0.0885	0.0837	0.0718	0.0602	0.0513	0.042	0.0341	0.03	0.027	0.0214	0.016	0.0279
1900	0.0014	0.0084	0.0214	0.0361	0.0494	0.0693	0.0715	0.0882	0.0868	0.086	0.0805	0.0701	0.0668	0.0542	0.0432	0.0342	0.0331	0.0266	0.0239	0.018	0.0309
1950	0.0009	0.0082	0.019	0.0354	0.0484	0.0596	0.0704	0.0816	0.089	0.0867	0.0845	0.0704	0.064	0.0547	0.0476	0.0378	0.0337	0.0286	0.0232	0.0211	0.0352
2000	0.0013	0.0067	0.0202	0.0328	0.0439	0.0566	0.0698	0.077	0.0842	0.0863	0.0898	0.0749	0.0608	0.056	0.0481	0.0407	0.0376	0.0267	0.025	0.0217	0.0399
2050	0.0008	0.0079	0.0189	0.0279	0.0393	0.0531	0.0681	0.0784	0.083	0.0853	0.0869	0.0746	0.0697	0.0564	0.047	0.0433	0.0347	0.0315	0.0259	0.023	0.0443
2100	0.0011	0.0061	0.0181	0.0277	0.0377	0.0484	0.0614	0.0807	0.0822	0.0811	0.0913	0.0742	0.0651	0.0594	0.0507	0.0426	0.0396	0.0323	0.0278	0.022	0.0505
2150	0.0006	0.0068	0.0166	0.0275	0.0309	0.0501	0.0621	0.0749	0.0794	0.0774	0.0897	0.0761	0.0671	0.0616	0.0547	0.0426	0.0368	0.0362	0.0295	0.024	0.0554
2200	0.001	0.0058	0.0154	0.0257	0.0318	0.0449	0.057	0.0736	0.079	0.0778	0.0875	0.0766	0.0664	0.0615	0.0551	0.0468	0.0435	0.0343	0.0289	0.0258	0.0616
2250	0.0006	0.0054	0.012	0.0238	0.0343	0.0406	0.053	0.072	0.0768	0.0768	0.0919	0.079	0.0684	0.0602	0.0544	0.0479	0.042	0.037	0.0313	0.0253	0.0673
2300	0.0003	0.0057	0.0122	0.0219	0.03	0.0426	0.0533	0.0627	0.0744	0.073	0.0949	0.0778	0.0737	0.0589	0.0575	0.0456	0.0403	0.0399	0.0335	0.0285	0.0733
2350	0.0005	0.0045	0.0124	0.0212	0.029	0.0371	0.0505	0.0678	0.0728	0.0704	0.0859	0.0779	0.0713	0.0636	0.0587	0.0489	0.0468	0.0361	0.0347	0.0298	0.0801
2400	0.0002	0.0039	0.0117	0.0197	0.0266	0.0362	0.0444	0.0641	0.0713	0.0754	0.0873	0.0777	0.0715	0.0629	0.0581	0.0532	0.0436	0.0401	0.033	0.0322	0.0869
2450	0.0003	0.0039	0.0112	0.0178	0.024	0.0355	0.0462	0.0604	0.0693	0.0693	0.0876	0.0838	0.0719	0.0615	0.0589	0.049	0.0466	0.0398	0.0366	0.0306	0.0958
2500	0.0004	0.0028	0.0098	0.0178	0.0231	0.0354	0.0459	0.0548	0.0617	0.0723	0.0909	0.0826	0.0707	0.0666	0.0562	0.0483	0.0461	0.0407	0.039	0.0319	0.103
2550	0.0002	0.0035	0.0088	0.0165	0.0214	0.0339	0.0409	0.0553	0.0613	0.0686	0.0908	0.0835	0.0734	0.0653	0.0565	0.0523	0.0446	0.0432	0.0355	0.034	0.1105
2600	0.0004	0.0028	0.0088	0.0141	0.0207	0.0319	0.0379	0.0514	0.061	0.0687	0.089	0.0814	0.0757	0.0661	0.0568	0.0533	0.0464	0.0425	0.037	0.0358	0.1183
2650	0.0004	0.0033	0.0067	0.0136	0.0217	0.0283	0.0373	0.0478	0.0591	0.0632	0.0862	0.08	0.0792	0.0695	0.0633	0.0481	0.0451	0.0439	0.0389	0.0373	0.1271
2700	0.0002	0.003	0.0072	0.0131	0.0213	0.0256	0.0337	0.047	0.0539	0.0633	0.0872	0.0773	0.0782	0.0649	0.0641	0.0551	0.0487	0.0437	0.0415	0.0354	0.1356
2750	0.0003	0.0025	0.0066	0.0119	0.0186	0.0263	0.0329	0.0447	0.0523	0.0623	0.0838	0.0832	0.0733	0.0681	0.0633	0.054	0.0465	0.0434	0.0452	0.0353	0.1455
2800	0.0001	0.0031	0.0059	0.0121	0.0152	0.0234	0.0329	0.04	0.0551	0.0562	0.0894	0.0802	0.0764	0.0625	0.0637	0.0556	0.0502	0.0417	0.0447	0.0374	0.1542
2850	0.0004	0.0022	0.0043	0.0114	0.0168	0.0222	0.0305	0.0426	0.0512	0.0541	0.0871	0.0778	0.0752	0.0636	0.0619	0.0581	0.0498	0.0459	0.0437	0.0393	0.1619
2900	0.0001	0.002	0.0044	0.013	0.0131	0.0214	0.031	0.0397	0.0481	0.0546	0.0841	0.0811	0.0713	0.0641	0.0582	0.0603	0.05	0.0465	0.0447	0.0412	0.1711
2950	0.0001	0.0015	0.005	0.0094	0.0145	0.0183	0.0291	0.0384	0.0471	0.0529	0.086	0.0787	0.0689	0.0627	0.0614	0.057	0.0549	0.0485	0.0431	0.0407	0.1818
3000	0.0002	0.0013	0.0039	0.0099	0.0117	0.02	0.028	0.0364	0.0451	0.0517	0.0833	0.0774	0.0692	0.0633	0.0593	0.0579	0.0538	0.0506	0.0439	0.0415	0.1916
3050	0.0004	0.0007	0.004	0.0097	0.0129	0.0158	0.0242	0.038	0.0432	0.0502	0.0835	0.0767	0.0685	0.0649	0.0627	0.0565	0.0531	0.0495	0.0453	0.0386	0.2016
3100	0.0002	0.0009	0.0035	0.0094	0.0132	0.017	0.0215	0.0356	0.0397	0.0499	0.0821	0.0774	0.0684	0.0642	0.06	0.0551	0.0548	0.0497	0.0456	0.0408	0.211
3150	0.0003	0.0011	0.0029	0.0076	0.0143	0.0171	0.0191	0.0306	0.0414	0.0482	0.0842	0.0756	0.0685	0.0634	0.062	0.0562	0.0516	0.0464	0.0458	0.0419	0.2218
3200	0.0005	0.001	0.0028	0.0084	0.0118	0.0165	0.0185	0.0312	0.0385	0.0458	0.0805	0.0698	0.0734	0.066	0.0646	0.052	0.0536	0.0482	0.043	0.0417	0.2322
3250	0.0003	0.001	0.0033	0.0068	0.0111	0.0153	0.0213	0.0291	0.0354	0.0442	0.076	0.0746	0.0691	0.0651	0.0644	0.0537	0.0553	0.0467	0.0447	0.0389	0.2437
3300	0.0001	0.0012	0.0032	0.0059	0.0096	0.0147	0.0203	0.0287	0.0347	0.0414	0.0769	0.0709	0.0699	0.0683	0.0582	0.0532	0.0553	0.0503	0.0448	0.0394	0.253
3350	0.0002	0.0009	0.0026	0.0055	0.01	0.015	0.0186	0.0249	0.0346	0.0405	0.075	0.0686	0.0677	0.072	0.0617	0.051	0.0497	0.0532	0.0431	0.044	0.2612
3400	0.0001	0.0006	0.0025	0.0054	0.0081	0.0132	0.0181	0.0253	0.0319	0.0383	0.0749	0.0702	0.0692	0.0661	0.0624	0.0539	0.0495	0.0492	0.0459	0.0439	0.2713
3450	0	0.0008	0.0028	0.0042	0.0087	0.0121	0.017	0.0244	0.0338	0.0376	0.069	0.0734	0.0653	0.0658	0.0614	0.0584	0.0489	0.0463	0.0454	0.0431	0.2816
3500	0.0003	0.0004	0.0026	0.005	0.0083	0.0092	0.016	0.0223	0.0326	0.0343	0.0766	0.0654	0.066	0.0675	0.0566	0.0587	0.0506	0.0496	0.0446	0.043	0.2904
3550	0	0.001	0.0018	0.0049	0.0073	0.0101	0.0156	0.0225	0.0285	0.0314	0.076	0.0697	0.0656	0.0591	0.0617	0.0557	0.049	0.0505	0.0448	0.042	0.3028
3600	0.0001	0.0008	0.0021	0.0051	0.0063	0.009	0.0133	0.0221	0.0284	0.0304	0.0685	0.0732	0.0644	0.0634	0.0587	0.0556	0.0514	0.0462	0.0442	0.0444	0.3124
3650	0	0.0008	0.0026	0.0044	0.0069	0.0084	0.013	0.0209	0.0264	0.0309	0.0716	0.0664	0.065	0.0604	0.0554	0.0582	0.0523	0.0481	0.0437	0.0415	0.3231
3700	0.0001	0.0009	0.0023	0.0042	0.0054	0.0089	0.0123	0.0205	0.0234	0.031	0.0693	0.0655	0.0622	0.0639	0.0542	0.0572	0.0525	0.0494	0.0427	0.0395	0.3346
3750	0.0002	0.001	0.0022	0.0032	0.0053	0.0095	0.0144	0.0178	0.0243	0.0282	0.0651	0.0679	0.0613	0.0622	0.0581	0.0528	0.0516	0.0466	0.0433	0.0416	0.3434
3800	0.0002	0.0007	0.0017	0.0046	0.0059	0.0072	0.0129	0.0188	0.0229	0.0281	0.0656	0.0627	0.0679	0.0544	0.0545	0.0532	0.051	0.0504	0.0431	0.0403	0.3539
3850	0.0001	0.0007	0.0016	0.0039	0.0058	0.0081	0.0107	0.018	0.0212	0.0276	0.0652	0.0601	0.0601	0.0574	0.0562	0.0545	0.0515	0.0466	0.0457	0.0434	0.3616
3900	0	0.0008	0.0016	0.0037	0.0046	0.0091	0.0086	0.0159	0.0213	0.0256	0.062	0.0589	0.0626	0.059	0.0573	0.0537	0.0454	0.0489	0.0461	0.0435	0.3714
3950	0.0002	0.0009	0.0014	0.0034	0.0043	0.0086	0.0085	0.0185	0.0178	0.0233	0.0632	0.0595	0.0612	0.0594	0.0516	0.0519	0.0487	0.0455	0.0488	0.041	0.3823
4000	0	0.0007	0.0013	0.0038	0.0035	0.008	0.0084	0.0143	0.0206	0.0226	0.0584	0.0624	0.058	0.0595	0.0531	0.0489	0.0505	0.0456	0.046	0.0421	0.3923
4050	0.0001	0.0006	0.0015	0.0026	0.0059	0.0062	0.0084	0.0149	0.0151	0.0241	0.0605	0.0592	0.059	0.0582	0.0487	0.0492	0.0501	0.0468	0.0441	0.0434	0.4014
4100	0.0002	0.0004	0.0019	0.0029	0.0048	0.0068	0.0082	0.0122	0.0176	0.0221	0.0613	0.0574	0.0571	0.0545	0.049	0.0507	0.0499	0.0455	0.0438	0.0418	0.4119
4150	0.0001	0.0006	0.0017	0.0036	0.0038	0.0059	0.008	0.0118	0.0191	0.0152	0.0624	0.0582	0.0532	0.0488	0.0536	0.0514	0.0496	0.0482	0.04	0.0413	0.4235
4200	0.0002	0.0003	0.0015	0.0031	0.0048	0.005	0.0078	0.0109	0.0155	0.0168	0.0608	0.0568	0.0551	0.0545	0.0472	0.0487	0.0463	0.0457	0.0449	0.0392	0.4349
4250	0.0001	0.0005	0.0013	0.0024	0.0052	0.0053	0.0063	0.0102	0.0142	0.0195	0.0618	0.0519	0.0537	0.0518	0.0485	0.0488	0.0458	0.0451	0.0427	0.0404	0.4445
4300	0.0001	0.0007	0.0016	0.0026	0.0035	0.0049	0.0078	0.0092	0.0149	0.0173	0.0532	0.0585	0.0512	0.0536	0.0485	0.0455	0.0476	0.0422	0.043	0.0395	0.4546
4350	0.0003	0.0005	0.0009	0.0024	0.0037	0.0043	0.009	0.0105	0.0135	0.0173	0.0521	0.0525	0.0504	0.0519	0.0506	0.0492	0.0432	0.04	0.0426	0.0414	0.4637
4400	0.0001	0.0006	0.001	0.0021	0.0034	0.005	0.0062	0.0111	0.0142	0.0158	0.0532	0.0516	0.0496	0.051	0.0467	0.0457	0.0431	0.0436	0.0402	0.0413	0.4745
4450	0	0.0006	0.0014	0.0014	0.0038	0.0048	0.0055	0.0097	0.0143	0.0151	0.0488	0.0549	0.0485	0.0502	0.0457	0.0469	0.0415	0.0423	0.0395	0.0401	0.485
4500	0	0.0007	0.0013	0.0012	0.0041	0.0042	0.004	0.0103	0.0128	0.014	0.0529	0.0494	0.0512	0.0479	0.0439	0.0413	0.0434	0.0446	0.0395	0.0378	0.4955
4550	0.0001	0.0006	0.0012	0.0014	0.0027	0.0038	0.0043	0.01	0.0115	0.0154	0.0521	0.0472	0.0489	0.0439	0.0483	0.0394	0.0415	0.0443	0.043	0.0345	0.5059
4600	0	0.0007	0.0011	0.0019	0.003	0.003	0.005	0.0082	0.0114	0.0142	0.051	0.0451	0.049	0.0473	0.043	0.0426	0.0431	0.0415	0.039	0.0354	0.5145
4650	0.0001	0.0006	0.001	0.002	0.0028	0.0035	0.0041	0.0083	0.0098	0.0134	0.0489	0.0494	0.0459	0.048	0.0425	0.041	0.0407	0.0413	0.0387	0.036	0.522
4700	0	0.0004	0.0014	0.0016	0.0022	0.0036	0.0044	0.0081	0.0088	0.0124	0.0466	0.0466	0.0503	0.0449	0.0406	0.0444	0.0385	0.0396	0.0391	0.0346	0.5319
4750	0.0001	0.0003	0.0009	0.002	0.0021	0.0034	0.0052	0.0062	0.0098	0.0118	0.0471	0.0423	0.0476	0.0442	0.0424	0.0405	0.0414	0.0365	0.039	0.0367	0.5405
4800	0.0002	0.0001	0.0012	0.0016	0.0019	0.0031	0.0053	0.007	0.0089	0.0136	0.042	0.0462	0.0429	0.0416	0.0422	0.0413	0.0417	0.0365	0.0357	0.0375	0.5495
4850	0.0001	0.0002	0.0006	0.0023	0.0027	0.0025	0.0038	0.0069	0.0087	0.0121	0.0445	0.0435	0.0411	0.0427	0.0377	0.0421	0.0418	0.0358	0.0376	0.0345	0.5588
4900	0	0.0005	0.0008	0.0016	0.002	0.0019	0.0056	0.0055	0.0098	0.0098	0.0455	0.0416	0.0424	0.041	0.0414	0.0363	0.0419	0.0346	0.0352	0.037	0.5656
4950	0	0.0004	0.0011	0.0011	0.0024	0.0031	0.0038	0.0051	0.0085	0.0093	0.0431	0.0429	0.0413	0.0417	0.0363	0.0398	0.0383	0.0342	0.0395	0.034	0.5741
5000	0	0.0003	0.0011	0.0013	0.0022	0.0027	0.0037	0.0051	0.0083	0.0098	0.0408	0.0411	0.0397	0.0417	0.0401	0.0367	0.0354	0.0388	0.0342	0.0348	0.5822
5050	0	0.0003	0.001	0.001	0.0021	0.0025	0.0033	0.0059	0.0072	0.0097	0.0389	0.042	0.0411	0.0382	0.0358	0.0371	0.0354	0.0384	0.035	0.0351	0.59
5100	0	0.0006	0.0007	0.0013	0.0018	0.0021	0.0036	0.0037	0.0084	0.0093	0.0393	0.0389	0.0398	0.0376	0.0368	0.0368	0.0366	0.0358	0.0336	0.036	0.5973
5150	0	0.0003	0.0006	0.0015	0.0013	0.0023	0.0023	0.0044	0.0072	0.0077	0.0416	0.0391	0.0365	0.0383	0.038	0.0327	0.0364	0.0339	0.0332	0.0367	0.606
5200	0	0.0002	0.0006	0.0006	0.002	0.002	0.0023	0.0042	0.0068	0.0081	0.043	0.0406	0.0335	0.0386	0.0363	0.0322	0.0332	0.0343	0.032	0.035	0.6145
5250	0.0001	0.0001	0.0005	0.0009	0.0017	0.0011	0.0022	0.0052	0.0054	0.008	0.0407	0.0423	0.0358	0.0343	0.0335	0.0341	0.0328	0.0304	0.0321	0.0358	0.623
5300	0.0001	0.0003	0.0004	0.0009	0.0009	0.0013	0.0035	0.0028	0.0063	0.0075	0.0405	0.0388	0.0356	0.0352	0.0335	0.0344	0.0319	0.0281	0.0318	0.0344	0.6318
5350	0.0001	0.0003	0.0003	0.0006	0.0009	0.0017	0.0022	0.0038	0.0064	0.0066	0.039	0.0363	0.0365	0.0361	0.0317	0.034	0.0294	0.0305	0.0314	0.0296	0.6426
5400	0.0001	0.0004	0.0002	0.0009	0.0009	0.0015	0.0017	0.0037	0.0048	0.0062	0.0336	0.0385	0.0377	0.0372	0.0312	0.0305	0.0315	0.0323	0.0278	0.029	0.6503
5450	0.0002	0.0002	0.0005	0.0008	0.0007	0.001	0.0023	0.0036	0.0038	0.0071	0.0387	0.0327	0.0362	0.0338	0.0314	0.0323	0.031	0.0292	0.0291	0.0282	0.6572
5500	0.0001	0.0003	0.0005	0.0008	0.0006	0.0012	0.0015	0.0039	0.0036	0.0064	0.0316	0.0373	0.0353	0.0312	0.0333	0.0342	0.0302	0.0277	0.0275	0.0278	0.665
5550	0.0001	0.0002	0.0007	0.0002	0.0013	0.0011	0.0013	0.0028	0.0052	0.0052	0.0321	0.0334	0.0338	0.0321	0.0315	0.0342	0.0312	0.0279	0.0268	0.0274	0.6715
5600	0.0001	0.0002	0.0002	0.0006	0.0011	0.001	0.0016	0.0026	0.0044	0.0059	0.03	0.034	0.0334	0.0324	0.0313	0.0313	0.0301	0.0274	0.0295	0.0247	0.6782
5650	0.0001	0.0001	0.0005	0.0006	0.0008	0.001	0.0016	0.0026	0.0039	0.0055	0.0298	0.0322	0.0302	0.032	0.0318	0.0327	0.029	0.027	0.0271	0.027	0.6845
5700	0.0001	0.0002	0.0007	0.0002	0.0009	0.0015	0.0008	0.0036	0.0032	0.0048	0.0314	0.0289	0.0281	0.0323	0.03	0.0299	0.0312	0.0301	0.0248	0.0266	0.6907
5750	0.0002	0.0001	0.0006	0.0003	0.0007	0.0012	0.0016	0.0021	0.0042	0.0042	0.0315	0.0289	0.0303	0.0293	0.0288	0.0278	0.0286	0.0293	0.027	0.0261	0.6972
5800	0	0.0002	0.0007	0.0004	0.0006	0.0014	0.0014	0.0021	0.0027	0.0038	0.0307	0.0281	0.0293	0.0286	0.0303	0.0284	0.029	0.0262	0.0265	0.026	0.7036
5850	0	0.0002	0.0006	0.0003	0.0009	0.0009	0.001	0.0018	0.0035	0.0046	0.0261	0.0295	0.0287	0.028	0.0272	0.0297	0.0293	0.0264	0.0258	0.0248	0.7107
5900	0	0.0002	0.0003	0.0009	0.0007	0.0005	0.0011	0.002	0.0034	0.0044	0.0289	0.0264	0.0263	0.0312	0.0271	0.0257	0.0274	0.0267	0.0256	0.0248	0.7164
5950	0	0.0001	0.0006	0.0004	0.0007	0.0008	0.0011	0.002	0.0028	0.0037	0.0266	0.0281	0.0276	0.0282	0.0268	0.027	0.0262	0.0252	0.0263	0.0237	0.7221
6000	0	0.0001	0.0005	0.0005	0.0005	0.0005	0.0012	0.0015	0.0039	0.0038	0.0283	0.0271	0.0253	0.0255	0.0278	0.0268	0.0233	0.024	0.0286	0.0238	0.727
6050	0	0.0001	0.0006	0.0004	0.0004	0.0004	0.0006	0.0029	0.0031	0.0032	0.0278	0.0242	0.0236	0.0268	0.0251	0.0274	0.0244	0.0238	0.0266	0.027	0.7316
6100	0	0.0001	0.0006	0.0006	0.0001	0.0004	0.0005	0.0021	0.0033	0.0034	0.026	0.0241	0.0246	0.0245	0.0234	0.0283	0.0236	0.0254	0.0261	0.0254	0.7375
6150	0	0.0002	0.0005	0.0002	0.0001	0.0007	0.0008	0.0015	0.0032	0.003	0.0251	0.0239	0.0258	0.0246	0.024	0.0233	0.0275	0.0242	0.0237	0.0241	0.7436
6200	0	0.0002	0.0003	0.0006	0	0.0002	0.001	0.001	0.0021	0.0039	0.0264	0.0245	0.0234	0.0224	0.0257	0.0243	0.0236	0.0222	0.0248	0.0242	0.7492
6250	0	0.0003	0.0004	0.0002	0.0004	0.0003	0.0003	0.0013	0.0023	0.0033	0.0258	0.0241	0.0226	0.0254	0.0231	0.0237	0.0224	0.0225	0.0222	0.0248	0.7546
6300	0	0.0002	0.0001	0.0004	0.0002	0.0005	0.001	0.0014	0.002	0.0038	0.0239	0.0231	0.0232	0.0225	0.0231	0.0229	0.0252	0.0207	0.0226	0.0229	0.7603
6350	0	0.0001	0.0001	0.0004	0.0004	0.001	0.0006	0.0011	0.0026	0.0029	0.0238	0.0209	0.0227	0.0247	0.0218	0.023	0.0209	0.0218	0.0236	0.0216	0.766
6400	0	0.0001	0.0003	0.0002	0.0004	0.0006	0.0009	0.0008	0.0027	0.0031	0.0222	0.0236	0.0236	0.0216	0.0215	0.0201	0.0209	0.0218	0.0238	0.0205	0.7713
6450	0	0.0001	0.0002	0.0004	0.0004	0.0005	0.0009	0.0008	0.0015	0.0034	0.0216	0.0225	0.021	0.0231	0.0219	0.0209	0.0212	0.0202	0.0227	0.0205	0.7762
6500	0	0	0.0001	0.0003	0.0003	0.0005	0.0009	0.0006	0.0018	0.003	0.0212	0.023	0.022	0.0204	0.0212	0.02	0.0196	0.0222	0.0203	0.0206	0.782
6550	0	0	0.0001	0.0005	0.0003	0.0003	0.0007	0.0012	0.0021	0.0018	0.0232	0.0196	0.021	0.0211	0.0192	0.0221	0.0197	0.0214	0.018	0.0211	0.7866
6600	0	0.0001	0.0001	0.0001	0.0002	0.0007	0.0006	0.0007	0.002	0.003	0.0204	0.0215	0.0199	0.0177	0.0221	0.0188	0.0211	0.0204	0.02	0.0187	0.7919
6650	0	0	0.0002	0.0001	0.0002	0.0004	0.0006	0.001	0.0018	0.0019	0.0239	0.0178	0.0188	0.0183	0.0187	0.0214	0.0222	0.0181	0.0194	0.019	0.7962
6700	0	0	0.0001	0.0002	0.0003	0.0004	0.0006	0.0009	0.0019	0.0017	0.0194	0.0205	0.0205	0.0178	0.0189	0.0182	0.0192	0.0225	0.0188	0.0175	0.8006
6750	0	0	0.0001	0.0001	0.0003	0.0004	0.001	0.001	0.0016	0.0016	0.0194	0.0182	0.0188	0.0197	0.0186	0.0187	0.0192	0.0187	0.019	0.0182	0.8054
6800	0	0	0	0.0004	0.0002	0.0006	0.0008	0.0005	0.0011	0.002	0.0182	0.0192	0.0174	0.02	0.0186	0.0186	0.0173	0.0192	0.0176	0.0177	0.8106
6850	0	0	0	0.0002	0.0003	0.0008	0.0005	0.0004	0.0009	0.0021	0.0185	0.0178	0.0172	0.0195	0.0163	0.0189	0.0172	0.0178	0.0172	0.0192	0.8152
6900	0	0	0	0.0005	0.0003	0.0003	0.0001	0.001	0.0007	0.002	0.0177	0.0176	0.0193	0.0175	0.0188	0.0143	0.0162	0.0176	0.0179	0.0183	0.8199
6950	0	0	0.0002	0.0002	0.0001	0.0003	0.0004	0.0004	0.0013	0.0011	0.0187	0.0175	0.0176	0.0172	0.0173	0.015	0.0166	0.0174	0.0174	0.0173	0.824
7000	0	0	0.0001	0.0004	0	0.0005	0.0002	0.0005	0.0011	0.001	0.0166	0.0161	0.0187	0.0161	0.0189	0.0152	0.0161	0.0156	0.0172	0.0175	0.8282
