# Supplementary material for: Mitochondrial DNA mosaicism in human normal somatic cells
Source: Research Square preprint supplement (doi:10.21203/rs.3.rs-3602675/v1), 2023-11-21
Supplement: Supplementary file 4 [file 53255e171864a918770c28a6.xlsx]

## Sheet: SuppleTable_background_noise_ma
Supplementary Table 3. Background noise matrix of mtDNA variants
The following metadata is reported for background noise matrix of each mtDNA variant: CHROM = chromosome; POS= position; REF= reference allele; ALT = alternative allele; type = type of variants (SNV or Indel); cutoff = background noise of the variant
CHROM	POS	REF	ALT	type	cutoff
MT	10	T	C	SNV	0.0102
MT	18	C	T	SNV	0.0063
MT	29	C	G	SNV	0.0051
MT	35	G	A	SNV	0.0077
MT	36	G	A	SNV	0.0041
MT	37	A	G	SNV	0.0092
MT	47	G	A	SNV	0.0059
MT	62	G	T	SNV	0.0068
MT	64	C	T	SNV	0.01
MT	65	T	TG	Indel	0.0045
MT	65	TG	T	Indel	0.01
MT	66	G	A	SNV	0.0077
MT	71	G	A	SNV	0.0076
MT	71	GT	G	Indel	0.0041
MT	72	T	C	SNV	0.0165
MT	72	T	G	SNV	0.0244
MT	73	A	G	SNV	0.0197
MT	76	C	T	SNV	0.0064
MT	94	G	A	SNV	0.0056
MT	102	A	G	SNV	0.0101
MT	103	G	A	SNV	0.01
MT	103	G	C	SNV	0.0063
MT	108	A	G	SNV	0.0169
MT	109	G	A	SNV	0.0106
MT	112	C	T	SNV	0.004
MT	113	C	T	SNV	0.0047
MT	115	T	C	SNV	0.0084
MT	116	A	G	SNV	0.0076
MT	131	T	C	SNV	0.0071
MT	138	T	C	SNV	0.0053
MT	139	T	C	SNV	0.0096
MT	140	C	T	SNV	0.0062
MT	143	G	A	SNV	0.0215
MT	146	T	C	SNV	0.015
MT	150	C	T	SNV	0.01
MT	151	C	T	SNV	0.004
MT	152	T	C	SNV	0.0148
MT	153	A	G	SNV	0.005
MT	155	T	C	SNV	0.0055
MT	160	A	G	SNV	0.0056
MT	161	T	C	SNV	0.0057
MT	174	C	T	SNV	0.0042
MT	177	T	C	SNV	0.007
MT	178	A	G	SNV	0.005
MT	181	A	G	SNV	0.0041
MT	182	C	T	SNV	0.005
MT	183	A	G	SNV	0.007
MT	186	C	T	SNV	0.0048
MT	186	C	CG	Indel	0.01
MT	189	A	C	SNV	0.0092
MT	189	A	G	SNV	0.0055
MT	191	A	G	SNV	0.0058
MT	191	A	AC	Indel	0.005
MT	193	A	G	SNV	0.0066
MT	194	C	T	SNV	0.0129
MT	195	T	C	SNV	0.01
MT	198	C	T	SNV	0.0062
MT	200	A	G	SNV	0.0053
MT	203	G	A	SNV	0.0038
MT	204	T	C	SNV	0.01
MT	205	G	A	SNV	0.0052
MT	206	T	C	SNV	0.0057
MT	207	G	A	SNV	0.005
MT	208	T	C	SNV	0.0068
MT	210	A	G	SNV	0.0056
MT	212	T	C	SNV	0.0055
MT	214	A	G	SNV	0.004
MT	215	A	G	SNV	0.0056
MT	217	T	C	SNV	0.0075
MT	226	T	C	SNV	0.0058
MT	227	A	G	SNV	0.0058
MT	228	G	A	SNV	0.005
MT	230	A	G	SNV	0.0056
MT	231	C	CATA	Indel	0.0043
MT	235	A	G	SNV	0.0064
MT	236	T	C	SNV	0.0056
MT	239	T	C	SNV	0.008
MT	239	TAAC	T	Indel	0.01
MT	241	A	G	SNV	0.004
MT	246	T	C	SNV	0.008
MT	247	G	A	SNV	0.0052
MT	248	A	G	SNV	0.0071
MT	249	A	T	SNV	0.02
MT	252	T	C	SNV	0.0108
MT	257	A	C	SNV	0.01
MT	260	G	A	SNV	0.0053
MT	276	A	G	SNV	0.0083
MT	278	A	G	SNV	0.0046
MT	279	T	C	SNV	0.015
MT	282	T	C	SNV	0.0074
MT	287	A	C	SNV	0.0357
MT	291	A	T	SNV	0.0194
MT	293	T	C	SNV	0.017
MT	293	T	G	SNV	0.025
MT	297	A	C	SNV	0.05
MT	297	ACCAAACCCCCCCTCCCCCGCTTCTGGCCACAGCACTTAAACACATCTCTG	A	Indel	0.0025
MT	300	A	C	SNV	0.07
MT	301	A	C	SNV	0.06
MT	318	T	G	SNV	0.074
MT	328	A	T	SNV	0.0071
MT	352	A	AC	Indel	0.0025
MT	357	A	T	SNV	0.0087
MT	368	A	G	SNV	0.0085
MT	372	T	C	SNV	0.0454
MT	384	A	G	SNV	0.0087
MT	405	T	C	SNV	0.01
MT	414	T	G	SNV	0.0151
MT	419	A	G	SNV	0.0067
MT	439	A	C	SNV	0.12
MT	442	T	C	SNV	0.0624
MT	449	T	C	SNV	0.0284
MT	449	T	G	SNV	0.0393
MT	451	A	C	SNV	0.03
MT	451	A	AT	Indel	0.005
MT	460	T	C	SNV	0.059
MT	464	A	C	SNV	0.11
MT	466	T	C	SNV	0.09
MT	468	C	T	SNV	0.0034
MT	469	CATA	C	Indel	0.0025
MT	471	T	G	SNV	0.1
MT	475	A	C	SNV	0.05
MT	476	CTAA	C	Indel	0.0025
MT	479	A	C	SNV	0.03
MT	480	T	G	SNV	0.03
MT	484	A	C	SNV	0.1
MT	485	T	C	SNV	0.0308
MT	487	A	C	SNV	0.035
MT	489	T	C	SNV	0.043
MT	490	A	T	SNV	0.0072
MT	493	A	C	SNV	0.06
MT	499	G	C	SNV	0.14
MT	503	A	C	SNV	0.1
MT	504	T	A	SNV	0.12
MT	504	T	G	SNV	0.055
MT	526	G	A	SNV	0.0075
MT	529	G	A	SNV	0.0073
MT	538	A	C	SNV	0.0778
MT	538	A	G	SNV	0.0095
MT	539	T	C	SNV	0.041
MT	540	A	C	SNV	0.05
MT	540	A	G	SNV	0.0148
MT	545	G	A	SNV	0.007
MT	547	AC	A	Indel	0.0025
MT	551	A	C	SNV	0.03
MT	551	A	G	SNV	0.0102
MT	554	A	C	SNV	0.05
MT	555	A	C	SNV	0.03
MT	556	A	G	SNV	0.0182
MT	561	A	C	SNV	0.0609
MT	562	A	C	SNV	0.035
MT	564	G	A	SNV	0.0517
MT	566	C	CA	Indel	0.0025
MT	574	A	C	SNV	0.0621
MT	576	A	C	SNV	0.0358
MT	579	T	C	SNV	0.0125
MT	581	A	AT	Indel	0.0025
MT	584	T	C	SNV	0.0075
MT	585	A	G	SNV	0.007
MT	586	G	A	SNV	0.01
MT	591	C	T	SNV	0.0039
MT	593	T	C	SNV	0.0446
MT	596	T	C	SNV	0.045
MT	605	T	C	SNV	0.015
MT	608	A	G	SNV	0.0054
MT	617	G	A	SNV	0.006
MT	622	G	A	SNV	0.0095
MT	627	G	A	SNV	0.0037
MT	642	T	C	SNV	0.008
MT	652	G	A	SNV	0.005
MT	654	T	C	SNV	0.01
MT	657	G	A	SNV	0.004
MT	658	G	A	SNV	0.0035
MT	659	T	C	SNV	0.0093
MT	662	T	C	SNV	0.0068
MT	664	G	A	SNV	0.0056
MT	668	T	C	SNV	0.0085
MT	669	T	C	SNV	0.008
MT	674	T	C	SNV	0.005
MT	676	G	A	SNV	0.005
MT	676	G	C	SNV	0.0067
MT	678	T	C	SNV	0.0126
MT	683	G	A	SNV	0.0044
MT	684	T	C	SNV	0.0051
MT	687	G	A	SNV	0.0048
MT	689	T	C	SNV	0.009
MT	704	T	C	SNV	0.0135
MT	709	G	A	SNV	0.01
MT	711	T	C	SNV	0.0104
MT	717	G	A	SNV	0.0035
MT	718	A	G	SNV	0.0087
MT	721	T	C	SNV	0.0105
MT	723	A	G	SNV	0.0062
MT	727	T	C	SNV	0.0102
MT	729	T	C	SNV	0.0067
MT	747	A	G	SNV	0.0084
MT	758	T	C	SNV	0.0096
MT	764	A	C	SNV	0.0064
MT	769	G	A	SNV	0.0047
MT	772	A	G	SNV	0.0039
MT	777	G	A	SNV	0.0044
MT	779	T	C	SNV	0.0145
MT	782	A	AT	Indel	0.0025
MT	784	A	G	SNV	0.0075
MT	786	G	A	SNV	0.0047
MT	791	G	A	SNV	0.0039
MT	801	A	AC	Indel	0.0046
MT	807	A	C	SNV	0.0171
MT	807	A	G	SNV	0.01
MT	809	G	A	SNV	0.0047
MT	811	G	A	SNV	0.0047
MT	814	A	G	SNV	0.0071
MT	820	G	A	SNV	0.0029
MT	822	G	A	SNV	0.004
MT	823	A	G	SNV	0.0044
MT	827	A	G	SNV	0.0055
MT	834	G	A	SNV	0.004
MT	835	C	T	SNV	0.0049
MT	857	G	A	SNV	0.0043
MT	858	C	T	SNV	0.0027
MT	859	T	C	SNV	0.0051
MT	866	A	G	SNV	0.009
MT	871	A	G	SNV	0.0055
MT	873	G	A	SNV	0.0041
MT	874	G	A	SNV	0.0037
MT	876	T	C	SNV	0.0048
MT	877	G	A	SNV	0.0043
MT	892	A	G	SNV	0.0052
MT	896	A	C	SNV	0.04
MT	896	A	G	SNV	0.005
MT	899	G	A	SNV	0.0035
MT	901	G	A	SNV	0.0047
MT	902	G	A	SNV	0.0038
MT	903	T	C	SNV	0.0147
MT	909	G	A	SNV	0.0056
MT	911	T	C	SNV	0.0104
MT	914	A	G	SNV	0.0047
MT	921	T	C	SNV	0.008
MT	927	G	A	SNV	0.0056
MT	933	G	A	SNV	0.005
MT	934	G	A	SNV	0.0047
MT	941	G	A	SNV	0.0042
MT	943	G	A	SNV	0.0053
MT	945	G	A	SNV	0.0028
MT	951	G	A	SNV	0.0054
MT	953	T	TAA	Indel	0.01
MT	954	CA	C	Indel	0.005
MT	959	CCT	C	Indel	0.005
MT	961	T	C	SNV	0.0152
MT	964	C	T	SNV	0.0043
MT	966	A	C	SNV	0.0285
MT	980	T	C	SNV	0.006
MT	982	A	G	SNV	0.005
MT	985	T	C	SNV	0.0047
MT	986	G	A	SNV	0.004
MT	988	G	A	SNV	0.0037
MT	989	T	C	SNV	0.0122
MT	992	TA	T	Indel	0.0076
MT	998	A	C	SNV	0.015
MT	1000	T	C	SNV	0.0091
MT	1003	A	G	SNV	0.0047
MT	1007	G	A	SNV	0.0049
MT	1019	A	G	SNV	0.0055
MT	1024	G	A	SNV	0.005
MT	1027	A	G	SNV	0.005
MT	1030	G	A	SNV	0.0048
MT	1040	T	C	SNV	0.005
MT	1042	T	C	SNV	0.01
MT	1045	G	A	SNV	0.005
MT	1057	G	A	SNV	0.0046
MT	1061	A	G	SNV	0.004
MT	1063	A	G	SNV	0.0063
MT	1068	A	G	SNV	0.005
MT	1069	A	G	SNV	0.0084
MT	1072	G	A	SNV	0.005
MT	1073	G	A	SNV	0.0055
MT	1074	G	A	SNV	0.0056
MT	1079	G	A	SNV	0.0053
MT	1080	A	G	SNV	0.004
MT	1082	A	G	SNV	0.01
MT	1082	AC	A	Indel	0.0025
MT	1097	G	A	SNV	0.005
MT	1117	A	G	SNV	0.0047
MT	1134	GC	G	Indel	0.0025
MT	1155	G	A	SNV	0.0035
MT	1169	G	A	SNV	0.0047
MT	1170	G	A	SNV	0.004
MT	1171	A	G	SNV	0.0081
MT	1175	G	A	SNV	0.0035
MT	1176	G	A	SNV	0.0041
MT	1178	G	A	SNV	0.0054
MT	1179	G	A	SNV	0.0037
MT	1181	G	A	SNV	0.004
MT	1184	T	C	SNV	0.0083
MT	1193	T	C	SNV	0.0095
MT	1195	T	C	SNV	0.0075
MT	1197	G	A	SNV	0.005
MT	1199	G	A	SNV	0.0037
MT	1200	G	A	SNV	0.0048
MT	1201	A	G	SNV	0.01
MT	1201	A	T	SNV	0.0042
MT	1202	G	A	SNV	0.004
MT	1206	G	A	SNV	0.0025
MT	1211	G	A	SNV	0.004
MT	1212	T	C	SNV	0.0047
MT	1214	A	G	SNV	0.0048
MT	1217	G	A	SNV	0.0039
MT	1222	A	G	SNV	0.0107
MT	1227	G	A	SNV	0.0052
MT	1229	T	C	SNV	0.006
MT	1232	A	G	SNV	0.0081
MT	1235	T	C	SNV	0.0096
MT	1237	A	G	SNV	0.006
MT	1243	T	C	SNV	0.01
MT	1245	T	C	SNV	0.0075
MT	1252	G	A	SNV	0.005
MT	1260	A	G	SNV	0.0084
MT	1267	T	C	SNV	0.0065
MT	1269	T	C	SNV	0.0046
MT	1273	G	A	SNV	0.005
MT	1277	A	G	SNV	0.0055
MT	1282	G	A	SNV	0.0034
MT	1285	G	A	SNV	0.0037
MT	1287	A	G	SNV	0.0035
MT	1288	G	A	SNV	0.004
MT	1289	G	A	SNV	0.0042
MT	1289	G	C	SNV	0.0051
MT	1301	G	A	SNV	0.0034
MT	1303	G	A	SNV	0.0039
MT	1316	T	C	SNV	0.0068
MT	1320	G	A	SNV	0.005
MT	1321	A	G	SNV	0.0075
MT	1325	T	C	SNV	0.006
MT	1326	A	G	SNV	0.0045
MT	1327	G	A	SNV	0.0036
MT	1329	T	C	SNV	0.0083
MT	1333	G	A	SNV	0.0045
MT	1334	G	A	SNV	0.0035
MT	1336	G	A	SNV	0.0037
MT	1337	T	C	SNV	0.007
MT	1338	A	G	SNV	0.0056
MT	1339	G	A	SNV	0.0048
MT	1345	G	A	SNV	0.0035
MT	1346	A	G	SNV	0.007
MT	1347	G	A	SNV	0.0061
MT	1348	G	A	SNV	0.0033
MT	1350	G	A	SNV	0.0048
MT	1351	G	A	SNV	0.0042
MT	1355	G	A	SNV	0.0046
MT	1360	G	A	SNV	0.0055
MT	1362	G	A	SNV	0.004
MT	1364	T	C	SNV	0.0059
MT	1369	T	C	SNV	0.0085
MT	1380	G	A	SNV	0.0059
MT	1389	G	A	SNV	0.0049
MT	1390	A	G	SNV	0.0057
MT	1391	T	C	SNV	0.0083
MT	1392	A	G	SNV	0.0052
MT	1393	G	A	SNV	0.0036
MT	1393	G	C	SNV	0.0044
MT	1396	CT	C	Indel	0.0025
MT	1403	A	G	SNV	0.005
MT	1404	A	G	SNV	0.0059
MT	1406	T	C	SNV	0.0059
MT	1409	A	G	SNV	0.0084
MT	1410	G	A	SNV	0.0052
MT	1411	G	A	SNV	0.0041
MT	1413	T	C	SNV	0.0088
MT	1415	G	A	SNV	0.0042
MT	1419	G	A	SNV	0.0062
MT	1421	G	A	SNV	0.005
MT	1422	G	A	SNV	0.005
MT	1428	G	A	SNV	0.0065
MT	1432	T	C	SNV	0.006
MT	1435	A	G	SNV	0.0051
MT	1437	T	C	SNV	0.0052
MT	1439	A	G	SNV	0.0073
MT	1440	G	A	SNV	0.0041
MT	1443	T	C	SNV	0.0113
MT	1445	G	A	SNV	0.0059
MT	1446	A	G	SNV	0.0064
MT	1447	G	A	SNV	0.0034
MT	1458	A	G	SNV	0.0045
MT	1459	A	G	SNV	0.0068
MT	1464	G	A	SNV	0.0037
MT	1474	G	A	SNV	0.0045
MT	1476	G	A	SNV	0.006
MT	1476	GTA	G	Indel	0.0025
MT	1477	T	C	SNV	0.01
MT	1485	G	C	SNV	0.0056
MT	1489	G	A	SNV	0.0039
MT	1496	T	C	SNV	0.0104
MT	1503	G	A	SNV	0.005
MT	1521	T	C	SNV	0.005
MT	1522	T	C	SNV	0.005
MT	1526	T	C	SNV	0.0054
MT	1535	T	C	SNV	0.0075
MT	1536	A	G	SNV	0.0058
MT	1538	G	A	SNV	0.0042
MT	1542	T	C	SNV	0.015
MT	1547	T	C	SNV	0.0043
MT	1547	T	G	SNV	0.0102
MT	1549	G	A	SNV	0.0033
MT	1551	G	A	SNV	0.0051
MT	1555	A	G	SNV	0.005
MT	1560	T	C	SNV	0.005
MT	1562	G	A	SNV	0.0044
MT	1570	G	A	SNV	0.0039
MT	1572	A	G	SNV	0.0049
MT	1573	A	G	SNV	0.005
MT	1574	G	A	SNV	0.0036
MT	1575	T	C	SNV	0.0075
MT	1578	A	G	SNV	0.004
MT	1581	G	A	SNV	0.005
MT	1585	A	G	SNV	0.005
MT	1588	G	A	SNV	0.0049
MT	1592	T	C	SNV	0.006
MT	1593	T	C	SNV	0.0075
MT	1597	C	T	SNV	0.0048
MT	1598	G	A	SNV	0.0047
MT	1604	G	A	SNV	0.0041
MT	1606	G	A	SNV	0.0034
MT	1611	G	A	SNV	0.003
MT	1614	T	C	SNV	0.0128
MT	1623	G	A	SNV	0.0058
MT	1641	G	A	SNV	0.0049
MT	1642	G	A	SNV	0.0044
MT	1645	A	G	SNV	0.005
MT	1646	T	C	SNV	0.0137
MT	1648	T	C	SNV	0.0083
MT	1651	A	G	SNV	0.0044
MT	1658	T	C	SNV	0.0079
MT	1661	A	G	SNV	0.005
MT	1664	G	A	SNV	0.0058
MT	1670	A	T	SNV	0.0061
MT	1671	G	A	SNV	0.0049
MT	1676	A	G	SNV	0.005
MT	1679	T	A	SNV	0.0062
MT	1681	G	A	SNV	0.0045
MT	1688	A	G	SNV	0.006
MT	1694	T	C	SNV	0.015
MT	1697	A	G	SNV	0.0067
MT	1704	T	C	SNV	0.01
MT	1713	A	G	SNV	0.0057
MT	1719	G	A	SNV	0.01
MT	1729	T	C	SNV	0.015
MT	1730	T	C	SNV	0.0045
MT	1743	T	C	SNV	0.0075
MT	1744	A	G	SNV	0.0038
MT	1745	T	C	SNV	0.0066
MT	1746	A	G	SNV	0.0047
MT	1747	G	A	SNV	0.005
MT	1748	G	A	SNV	0.0075
MT	1750	G	A	SNV	0.004
MT	1754	G	A	SNV	0.0057
MT	1767	G	A	SNV	0.005
MT	1776	G	A	SNV	0.0057
MT	1777	A	G	SNV	0.0061
MT	1782	G	A	SNV	0.0039
MT	1787	G	A	SNV	0.005
MT	1791	G	A	SNV	0.0055
MT	1792	G	A	SNV	0.0059
MT	1793	G	A	SNV	0.0057
MT	1797	G	A	SNV	0.0059
MT	1806	T	C	SNV	0.006
MT	1811	A	G	SNV	0.0075
MT	1836	A	G	SNV	0.0087
MT	1841	T	C	SNV	0.0084
MT	1844	A	G	SNV	0.0056
MT	1847	T	C	SNV	0.0095
MT	1862	T	C	SNV	0.01
MT	1877	T	C	SNV	0.0064
MT	1884	G	A	SNV	0.0056
MT	1885	A	G	SNV	0.0049
MT	1887	A	G	SNV	0.0061
MT	1888	G	A	SNV	0.005
MT	1894	G	A	SNV	0.0054
MT	1900	A	G	SNV	0.008
MT	1900	A	AC	Indel	0.01
MT	1906	G	A	SNV	0.005
MT	1913	G	A	SNV	0.0052
MT	1918	G	A	SNV	0.005
MT	1921	A	T	SNV	0.005
MT	1927	G	A	SNV	0.0077
MT	1932	G	A	SNV	0.0056
MT	1941	G	A	SNV	0.005
MT	1945	A	C	SNV	0.015
MT	1945	A	G	SNV	0.0073
MT	1949	G	A	SNV	0.0037
MT	1952	T	C	SNV	0.015
MT	1956	T	C	SNV	0.0116
MT	1964	T	C	SNV	0.0132
MT	1966	G	A	SNV	0.0041
MT	1967	T	C	SNV	0.0085
MT	1969	G	A	SNV	0.006
MT	1970	G	A	SNV	0.005
MT	1975	T	C	SNV	0.0106
MT	1979	T	C	SNV	0.0072
MT	1981	G	A	SNV	0.0042
MT	1982	G	A	SNV	0.005
MT	1983	T	C	SNV	0.006
MT	1985	G	GT	Indel	0.0025
MT	1987	G	A	SNV	0.0044
MT	1988	G	A	SNV	0.0061
MT	1990	G	A	SNV	0.005
MT	1995	A	G	SNV	0.0074
MT	1998	T	C	SNV	0.009
MT	1999	A	G	SNV	0.0075
MT	2002	G	A	SNV	0.0048
MT	2004	G	A	SNV	0.0049
MT	2007	T	C	SNV	0.006
MT	2009	G	A	SNV	0.004
MT	2010	T	C	SNV	0.0104
MT	2011	G	A	SNV	0.0048
MT	2015	G	A	SNV	0.0046
MT	2021	T	C	SNV	0.005
MT	2022	G	A	SNV	0.004
MT	2028	G	A	SNV	0.0055
MT	2031	A	T	SNV	0.0025
MT	2032	G	A	SNV	0.0051
MT	2034	A	G	SNV	0.0041
MT	2040	G	A	SNV	0.0034
MT	2042	T	C	SNV	0.007
MT	2045	A	T	SNV	0.0067
MT	2053	T	C	SNV	0.0102
MT	2054	T	C	SNV	0.0076
MT	2055	T	C	SNV	0.0058
MT	2056	G	A	SNV	0.0046
MT	2065	A	G	SNV	0.0063
MT	2075	TC	T	Indel	0.0025
MT	2087	T	C	SNV	0.0059
MT	2092	C	T	SNV	0.0025
MT	2093	T	C	SNV	0.0054
MT	2098	G	A	SNV	0.0041
MT	2107	G	A	SNV	0.0057
MT	2108	G	A	SNV	0.0061
MT	2109	A	G	SNV	0.007
MT	2110	A	G	SNV	0.0051
MT	2120	G	A	SNV	0.0053
MT	2121	G	A	SNV	0.0046
MT	2124	A	G	SNV	0.0036
MT	2126	T	C	SNV	0.0055
MT	2128	G	A	SNV	0.0055
MT	2129	G	A	SNV	0.0056
MT	2129	GA	G	Indel	0.01
MT	2135	A	C	SNV	0.0136
MT	2138	T	C	SNV	0.0055
MT	2140	GTA	G	Indel	0.0025
MT	2141	T	TAG	Indel	0.0045
MT	2141	TAG	T	Indel	0.0056
MT	2146	A	G	SNV	0.0059
MT	2147	G	A	SNV	0.0054
MT	2149	G	A	SNV	0.0032
MT	2150	TA	T	Indel	0.005
MT	2156	A	T	SNV	0.0051
MT	2163	A	G	SNV	0.0089
MT	2168	T	C	SNV	0.0084
MT	2170	G	A	SNV	0.0051
MT	2171	T	C	SNV	0.0073
MT	2173	G	A	SNV	0.005
MT	2174	G	A	SNV	0.0049
MT	2185	G	A	SNV	0.0051
MT	2193	T	C	SNV	0.0091
MT	2194	T	C	SNV	0.0108
MT	2203	G	A	SNV	0.0052
MT	2205	T	C	SNV	0.008
MT	2222	T	C	SNV	0.0093
MT	2226	T	C	SNV	0.0102
MT	2233	T	A	SNV	0.0065
MT	2248	T	C	SNV	0.0066
MT	2251	A	G	SNV	0.007
MT	2256	T	C	SNV	0.01
MT	2259	C	T	SNV	0.005
MT	2269	G	A	SNV	0.0054
MT	2270	A	G	SNV	0.0052
MT	2275	T	C	SNV	0.01
MT	2277	T	C	SNV	0.0088
MT	2279	T	C	SNV	0.0095
MT	2287	T	C	SNV	0.0075
MT	2299	T	C	SNV	0.0055
MT	2301	T	C	SNV	0.0055
MT	2302	T	C	SNV	0.0046
MT	2310	G	A	SNV	0.0058
MT	2316	T	C	SNV	0.0059
MT	2317	G	A	SNV	0.0046
MT	2333	G	A	SNV	0.005
MT	2336	T	C	SNV	0.0054
MT	2338	A	G	SNV	0.0075
MT	2339	G	A	SNV	0.004
MT	2339	G	C	SNV	0.0053
MT	2345	G	A	SNV	0.0038
MT	2346	T	C	SNV	0.0096
MT	2352	T	C	SNV	0.0055
MT	2361	G	A	SNV	0.005
MT	2365	T	C	SNV	0.0078
MT	2366	G	A	SNV	0.005
MT	2371	T	C	SNV	0.0075
MT	2377	G	A	SNV	0.0045
MT	2385	T	C	SNV	0.0091
MT	2395	A	G	SNV	0.0065
MT	2403	G	A	SNV	0.0085
MT	2404	T	C	SNV	0.015
MT	2405	C	T	SNV	0.0035
MT	2410	T	C	SNV	0.0059
MT	2412	A	G	SNV	0.0066
MT	2416	T	C	SNV	0.0123
MT	2421	G	A	SNV	0.005
MT	2425	A	G	SNV	0.0075
MT	2440	G	A	SNV	0.0049
MT	2445	T	C	SNV	0.0075
MT	2453	G	A	SNV	0.005
MT	2454	G	A	SNV	0.0051
MT	2455	T	C	SNV	0.01
MT	2456	T	TA	Indel	0.0033
MT	2471	G	A	SNV	0.005
MT	2473	A	G	SNV	0.0117
MT	2478	G	A	SNV	0.005
MT	2482	A	G	SNV	0.0067
MT	2483	T	C	SNV	0.01
MT	2485	T	C	SNV	0.0075
MT	2486	T	C	SNV	0.0085
MT	2487	A	C	SNV	0.0238
MT	2487	A	G	SNV	0.006
MT	2492	G	A	SNV	0.0049
MT	2492	G	C	SNV	0.0064
MT	2494	C	T	SNV	0.005
MT	2495	T	C	SNV	0.005
MT	2497	T	C	SNV	0.0067
MT	2505	AAACATCACCTCT	A	Indel	0.0025
MT	2507	A	G	SNV	0.005
MT	2515	T	C	SNV	0.01
MT	2519	G	A	SNV	0.0039
MT	2534	G	A	SNV	0.0055
MT	2536	G	A	SNV	0.0035
MT	2537	G	A	SNV	0.003
MT	2542	G	A	SNV	0.004
MT	2548	C	T	SNV	0.0082
MT	2551	G	A	SNV	0.0057
MT	2553	G	A	SNV	0.005
MT	2559	T	C	SNV	0.0067
MT	2560	G	A	SNV	0.0038
MT	2561	T	C	SNV	0.0073
MT	2568	G	C	SNV	0.0053
MT	2573	G	A	SNV	0.004
MT	2575	T	C	SNV	0.0074
MT	2576	A	G	SNV	0.0049
MT	2582	A	G	SNV	0.007
MT	2585	G	A	SNV	0.0048
MT	2593	G	A	SNV	0.0038
MT	2594	T	C	SNV	0.0075
MT	2596	G	A	SNV	0.0031
MT	2599	T	C	SNV	0.0059
MT	2607	T	C	SNV	0.007
MT	2618	T	C	SNV	0.0053
MT	2620	G	A	SNV	0.004
MT	2621	G	A	SNV	0.004
MT	2622	G	A	SNV	0.005
MT	2623	A	G	SNV	0.0135
MT	2623	A	T	SNV	0.0057
MT	2626	T	C	SNV	0.0049
MT	2627	G	A	SNV	0.0035
MT	2632	A	AT	Indel	0.0025
MT	2633	A	G	SNV	0.005
MT	2636	G	A	SNV	0.0053
MT	2638	T	C	SNV	0.01
MT	2639	C	T	SNV	0.005
MT	2640	C	T	SNV	0.0036
MT	2643	G	A	SNV	0.0041
MT	2644	A	G	SNV	0.0097
MT	2647	G	A	SNV	0.0044
MT	2648	T	C	SNV	0.0075
MT	2649	T	C	SNV	0.0053
MT	2652	G	A	SNV	0.0066
MT	2655	G	A	SNV	0.0045
MT	2655	GTC	G	Indel	0.0025
MT	2673	G	A	SNV	0.0035
MT	2675	G	A	SNV	0.0043
MT	2680	T	C	SNV	0.0069
MT	2682	A	G	SNV	0.005
MT	2695	G	A	SNV	0.0046
MT	2698	G	A	SNV	0.0039
MT	2700	G	A	SNV	0.0069
MT	2702	G	A	SNV	0.005
MT	2706	A	G	SNV	0.0125
MT	2716	G	A	SNV	0.0053
MT	2725	A	G	SNV	0.0057
MT	2730	A	G	SNV	0.0064
MT	2735	G	A	SNV	0.0038
MT	2742	T	C	SNV	0.0068
MT	2744	T	C	SNV	0.0059
MT	2758	G	A	SNV	0.005
MT	2769	A	G	SNV	0.0081
MT	2776	G	A	SNV	0.005
MT	2777	G	A	SNV	0.0058
MT	2778	T	C	SNV	0.0117
MT	2792	A	G	SNV	0.0097
MT	2809	C	G	SNV	0.004
MT	2810	G	A	SNV	0.0038
MT	2814	G	A	SNV	0.0053
MT	2815	G	A	SNV	0.0051
MT	2817	G	A	SNV	0.0059
MT	2819	GACCTCGGAGCAGAACCCA	G	Indel	0.0025
MT	2820	A	G	SNV	0.0099
MT	2823	T	C	SNV	0.009
MT	2825	G	A	SNV	0.0044
MT	2825	G	C	SNV	0.005
MT	2826	G	A	SNV	0.0046
MT	2828	G	A	SNV	0.0041
MT	2833	A	G	SNV	0.005
MT	2838	A	G	SNV	0.0138
MT	2840	C	T	SNV	0.004
MT	2844	G	A	SNV	0.005
MT	2846	G	A	SNV	0.0046
MT	2850	T	C	SNV	0.0057
MT	2855	G	A	SNV	0.0041
MT	2856	C	T	SNV	0.0044
MT	2857	T	C	SNV	0.0108
MT	2870	G	C	SNV	0.0057
MT	2874	A	G	SNV	0.0048
MT	2876	G	A	SNV	0.0061
MT	2890	T	C	SNV	0.0088
MT	2894	T	C	SNV	0.0081
MT	2896	G	A	SNV	0.0049
MT	2898	T	C	SNV	0.0099
MT	2905	A	G	SNV	0.0054
MT	2906	C	A	SNV	0.005
MT	2907	T	C	SNV	0.005
MT	2909	G	A	SNV	0.005
MT	2916	G	A	SNV	0.0065
MT	2923	G	A	SNV	0.0035
MT	2930	T	C	SNV	0.0059
MT	2931	A	G	SNV	0.005
MT	2931	A	T	SNV	0.0045
MT	2938	A	G	SNV	0.006
MT	2943	G	A	SNV	0.0034
MT	2946	A	G	SNV	0.007
MT	2947	T	C	SNV	0.0075
MT	2949	C	T	SNV	0.0035
MT	2959	G	A	SNV	0.0034
MT	2960	T	C	SNV	0.014
MT	2960	T	G	SNV	0.016
MT	2973	T	C	SNV	0.005
MT	2975	G	A	SNV	0.0045
MT	2976	G	A	SNV	0.0047
MT	2978	T	C	SNV	0.01
MT	2981	A	C	SNV	0.005
MT	2983	G	A	SNV	0.0046
MT	2984	A	G	SNV	0.01
MT	2998	T	C	SNV	0.0066
MT	3002	G	A	SNV	0.0035
MT	3003	A	G	SNV	0.005
MT	3005	A	G	SNV	0.0049
MT	3009	C	A	SNV	0.0061
MT	3010	G	A	SNV	0.005
MT	3011	A	G	SNV	0.0046
MT	3013	G	A	SNV	0.0048
MT	3014	G	A	SNV	0.0051
MT	3016	G	A	SNV	0.005
MT	3019	G	A	SNV	0.0059
MT	3019	G	C	SNV	0.0049
MT	3021	C	T	SNV	0.0039
MT	3022	G	A	SNV	0.005
MT	3032	G	A	SNV	0.0039
MT	3033	T	C	SNV	0.0065
MT	3036	G	A	SNV	0.0065
MT	3041	T	C	SNV	0.0062
MT	3047	G	A	SNV	0.0051
MT	3047	GATT	G	Indel	0.0025
MT	3054	G	A	SNV	0.0056
MT	3055	T	C	SNV	0.0089
MT	3061	G	A	SNV	0.0052
MT	3062	T	C	SNV	0.0047
MT	3063	G	A	SNV	0.0045
MT	3068	G	A	SNV	0.0031
MT	3071	T	C	SNV	0.0111
MT	3076	A	G	SNV	0.0087
MT	3079	G	A	SNV	0.0039
MT	3082	G	A	SNV	0.005
MT	3084	A	G	SNV	0.0039
MT	3085	A	G	SNV	0.0047
MT	3086	T	C	SNV	0.005
MT	3096	T	C	SNV	0.0092
MT	3097	T	G	SNV	0.01
MT	3098	T	C	SNV	0.005
MT	3115	T	C	SNV	0.0201
MT	3117	C	T	SNV	0.0035
MT	3118	T	C	SNV	0.016
MT	3123	G	A	SNV	0.005
MT	3127	G	A	SNV	0.0043
MT	3131	G	A	SNV	0.0057
MT	3139	G	A	SNV	0.0048
MT	3140	A	AAAT	Indel	0.0025
MT	3143	T	C	SNV	0.005
MT	3144	A	AT	Indel	0.0025
MT	3145	A	C	SNV	0.0086
MT	3153	T	C	SNV	0.0086
MT	3161	G	A	SNV	0.0049
MT	3163	G	A	SNV	0.0052
MT	3166	T	C	SNV	0.01
MT	3167	T	C	SNV	0.0195
MT	3173	G	A	SNV	0.004
MT	3174	T	C	SNV	0.0078
MT	3178	T	C	SNV	0.0074
MT	3183	T	C	SNV	0.0082
MT	3191	A	G	SNV	0.0054
MT	3196	G	A	SNV	0.0046
MT	3197	T	C	SNV	0.005
MT	3200	T	C	SNV	0.0064
MT	3203	A	G	SNV	0.0069
MT	3214	C	T	SNV	0.0025
MT	3224	G	A	SNV	0.0044
MT	3225	G	A	SNV	0.0058
MT	3228	T	C	SNV	0.0053
MT	3231	T	C	SNV	0.0054
MT	3232	T	A	SNV	0.0042
MT	3233	A	G	SNV	0.005
MT	3236	A	G	SNV	0.0048
MT	3238	G	A	SNV	0.0049
MT	3239	G	A	SNV	0.0049
MT	3242	G	A	SNV	0.0045
MT	3243	A	G	SNV	0.0048
MT	3243	A	T	SNV	0.0038
MT	3244	G	A	SNV	0.0079
MT	3248	G	A	SNV	0.0052
MT	3249	G	A	SNV	0.004
MT	3265	TA	T	Indel	0.005
MT	3268	A	G	SNV	0.0052
MT	3271	T	C	SNV	0.0103
MT	3277	G	A	SNV	0.003
MT	3281	G	A	SNV	0.0072
MT	3283	G	A	SNV	0.0043
MT	3285	T	C	SNV	0.0125
MT	3286	T	C	SNV	0.0065
MT	3290	T	C	SNV	0.0085
MT	3291	T	C	SNV	0.01
MT	3294	T	C	SNV	0.01
MT	3300	T	C	SNV	0.0082
MT	3309	A	G	SNV	0.0075
MT	3319	A	G	SNV	0.0058
MT	3323	T	C	SNV	0.0129
MT	3327	A	C	SNV	0.0279
MT	3329	T	A	SNV	0.005
MT	3332	T	C	SNV	0.0074
MT	3334	AT	A	Indel	0.0025
MT	3337	G	A	SNV	0.0036
MT	3343	A	G	SNV	0.0048
MT	3345	T	C	SNV	0.0061
MT	3354	A	G	SNV	0.0079
MT	3358	G	A	SNV	0.005
MT	3372	T	C	SNV	0.0098
MT	3373	A	G	SNV	0.0042
MT	3380	G	A	SNV	0.0078
MT	3391	G	A	SNV	0.005
MT	3397	A	G	SNV	0.0046
MT	3410	AAGGCCCCAACGTTGT	A	Indel	0.0025
MT	3413	G	C	SNV	0.01
MT	3418	AACGTTGTAGGCCCCT	A	Indel	0.0025
MT	3421	G	A	SNV	0.0042
MT	3427	G	A	SNV	0.0039
MT	3433	T	A	SNV	0.0045
MT	3434	A	G	SNV	0.005
MT	3441	A	G	SNV	0.0041
MT	3446	A	T	SNV	0.0049
MT	3447	A	C	SNV	0.04
MT	3451	T	C	SNV	0.0089
MT	3452	T	C	SNV	0.0083
MT	3457	G	A	SNV	0.0049
MT	3460	G	A	SNV	0.0046
MT	3467	A	G	SNV	0.005
MT	3479	A	C	SNV	0.025
MT	3481	G	A	SNV	0.0041
MT	3485	C	T	SNV	0.0032
MT	3489	A	C	SNV	0.025
MT	3490	A	C	SNV	0.025
MT	3491	A	C	SNV	0.03
MT	3492	A	C	SNV	0.06
MT	3496	G	A	SNV	0.0049
MT	3499	A	C	SNV	0.0471
MT	3501	A	C	SNV	0.03
MT	3502	T	G	SNV	0.0324
MT	3504	T	C	SNV	0.0113
MT	3504	T	G	SNV	0.03
MT	3505	A	C	SNV	0.04
MT	3508	A	C	SNV	0.05
MT	3509	T	C	SNV	0.015
MT	3511	A	C	SNV	0.03
MT	3515	T	C	SNV	0.015
MT	3517	T	G	SNV	0.0147
MT	3518	A	C	SNV	0.0326
MT	3520	A	C	SNV	0.035
MT	3521	T	C	SNV	0.0223
MT	3523	A	C	SNV	0.04
MT	3526	G	A	SNV	0.0059
MT	3531	G	A	SNV	0.005
MT	3538	G	A	SNV	0.0054
MT	3540	T	C	SNV	0.0332
MT	3547	A	C	SNV	0.06
MT	3550	G	A	SNV	0.0043
MT	3554	T	C	SNV	0.01
MT	3561	A	C	SNV	0.05
MT	3565	A	C	SNV	0.08
MT	3565	A	G	SNV	0.0396
MT	3565	A	AC	Indel	0.025
MT	3565	AC	A	Indel	0.005
MT	3566	C	A	SNV	0.0132
MT	3570	CCT	C	Indel	0.0025
MT	3571	CT	C	Indel	0.0025
MT	3572	T	C	SNV	0.08
MT	3572	T	G	SNV	0.17
MT	3577	A	C	SNV	0.13
MT	3578	T	G	SNV	0.1
MT	3579	A	C	SNV	0.05
MT	3583	A	C	SNV	0.09
MT	3584	A	C	SNV	0.06
MT	3592	G	A	SNV	0.005
MT	3599	T	C	SNV	0.06
MT	3602	A	C	SNV	0.04
MT	3606	A	C	SNV	0.03
MT	3607	G	A	SNV	0.01
MT	3616	T	C	SNV	0.0126
MT	3620	T	C	SNV	0.0079
MT	3628	A	C	SNV	0.05
MT	3628	A	G	SNV	0.0066
MT	3638	T	C	SNV	0.0219
MT	3641	C	T	SNV	0.0036
MT	3643	G	A	SNV	0.0049
MT	3647	ACT	A	Indel	0.0025
MT	3652	A	G	SNV	0.0072
MT	3661	T	C	SNV	0.0072
MT	3664	G	A	SNV	0.0046
MT	3665	G	A	SNV	0.0055
MT	3666	G	A	SNV	0.0048
MT	3673	T	C	SNV	0.0103
MT	3683	A	G	SNV	0.0072
MT	3697	G	A	SNV	0.0037
MT	3698	G	A	SNV	0.0046
MT	3699	C	T	SNV	0.0044
MT	3705	G	A	SNV	0.005
MT	3712	G	A	SNV	0.0036
MT	3713	T	C	SNV	0.0089
MT	3715	G	A	SNV	0.0068
MT	3719	A	G	SNV	0.0038
MT	3724	A	C	SNV	0.03
MT	3726	C	T	SNV	0.0032
MT	3727	T	C	SNV	0.0075
MT	3730	T	C	SNV	0.0089
MT	3736	G	A	SNV	0.0035
MT	3745	G	A	SNV	0.0045
MT	3748	A	G	SNV	0.005
MT	3749	T	C	SNV	0.0106
MT	3752	T	C	SNV	0.0075
MT	3758	T	C	SNV	0.0074
MT	3764	C	T	SNV	0.0031
MT	3767	T	C	SNV	0.009
MT	3773	T	C	SNV	0.0069
MT	3776	G	A	SNV	0.0033
MT	3777	T	C	SNV	0.0053
MT	3778	G	A	SNV	0.0044
MT	3784	T	C	SNV	0.0061
MT	3788	A	C	SNV	0.0279
MT	3791	T	C	SNV	0.015
MT	3796	A	C	SNV	0.03
MT	3803	T	C	SNV	0.0075
MT	3813	A	C	SNV	0.025
MT	3818	A	C	SNV	0.025
MT	3821	T	C	SNV	0.01
MT	3824	G	A	SNV	0.0048
MT	3834	G	A	SNV	0.005
MT	3842	G	A	SNV	0.0038
MT	3846	C	T	SNV	0.0032
MT	3849	G	A	SNV	0.0059
MT	3862	T	C	SNV	0.0096
MT	3867	C	T	SNV	0.003
MT	3877	G	A	SNV	0.005
MT	3887	A	G	SNV	0.0084
MT	3892	A	C	SNV	0.0346
MT	3894	C	T	SNV	0.0033
MT	3901	G	A	SNV	0.004
MT	3905	T	C	SNV	0.008
MT	3906	T	C	SNV	0.0075
MT	3908	C	T	SNV	0.0045
MT	3914	G	A	SNV	0.005
MT	3915	G	A	SNV	0.0053
MT	3917	A	G	SNV	0.0092
MT	3919	T	C	SNV	0.0175
MT	3921	C	A	SNV	0.0113
MT	3921	C	T	SNV	0.0048
MT	3922	G	A	SNV	0.0055
MT	3928	G	A	SNV	0.0044
MT	3931	TCAGGCTTCAACATCGAATACGCCG	T	Indel	0.0025
MT	3935	G	A	SNV	0.0041
MT	3946	G	A	SNV	0.004
MT	3949	T	C	SNV	0.0069
MT	3955	G	A	SNV	0.005
MT	3961	C	T	SNV	0.0045
MT	3964	T	C	SNV	0.01
MT	3965	T	C	SNV	0.01
MT	3967	G	A	SNV	0.003
MT	3970	CTA	C	Indel	0.0025
MT	3974	T	C	SNV	0.0075
MT	3980	T	C	SNV	0.0069
MT	3982	G	A	SNV	0.0045
MT	3985	G	A	SNV	0.0048
MT	3995	A	G	SNV	0.006
MT	3998	T	C	SNV	0.008
MT	4007	T	C	SNV	0.0081
MT	4016	T	C	SNV	0.0128
MT	4017	C	T	SNV	0.0029
MT	4027	A	C	SNV	0.025
MT	4030	T	C	SNV	0.0075
MT	4037	G	A	SNV	0.0045
MT	4042	A	G	SNV	0.0075
MT	4045	T	C	SNV	0.0075
MT	4048	G	A	SNV	0.0051
MT	4053	A	C	SNV	0.035
MT	4055	T	C	SNV	0.0246
MT	4057	T	C	SNV	0.0175
MT	4067	T	C	SNV	0.0088
MT	4067	TCTACA	T	Indel	0.0025
MT	4080	T	C	SNV	0.0086
MT	4092	G	A	SNV	0.0052
MT	4093	A	G	SNV	0.0042
MT	4101	T	C	SNV	0.0098
MT	4105	A	G	SNV	0.0089
MT	4108	T	C	SNV	0.0129
MT	4112	T	C	SNV	0.0075
MT	4127	G	A	SNV	0.0061
MT	4136	A	G	SNV	0.01
MT	4142	G	A	SNV	0.004
MT	4144	T	C	SNV	0.01
MT	4148	G	A	SNV	0.005
MT	4151	A	G	SNV	0.0047
MT	4164	A	G	SNV	0.0067
MT	4166	A	C	SNV	0.0437
MT	4175	G	A	SNV	0.005
MT	4175	GA	G	Indel	0.005
MT	4177	A	G	SNV	0.0032
MT	4181	A	G	SNV	0.0064
MT	4184	T	C	SNV	0.01
MT	4201	G	A	SNV	0.006
MT	4207	C	T	SNV	0.003
MT	4211	T	C	SNV	0.005
MT	4216	T	C	SNV	0.008
MT	4219	G	A	SNV	0.0044
MT	4220	T	C	SNV	0.008
MT	4227	A	G	SNV	0.0071
MT	4232	T	C	SNV	0.0095
MT	4238	T	C	SNV	0.01
MT	4240	T	C	SNV	0.0098
MT	4244	G	A	SNV	0.005
MT	4254	T	C	SNV	0.009
MT	4268	T	C	SNV	0.0055
MT	4271	G	A	SNV	0.0043
MT	4271	G	C	SNV	0.0052
MT	4275	G	A	SNV	0.006
MT	4277	T	C	SNV	0.0034
MT	4284	G	A	SNV	0.0056
MT	4285	T	C	SNV	0.015
MT	4296	G	A	SNV	0.0042
MT	4298	G	A	SNV	0.0055
MT	4299	T	C	SNV	0.0073
MT	4308	G	A	SNV	0.0035
MT	4309	G	A	SNV	0.0058
MT	4310	A	G	SNV	0.005
MT	4317	A	G	SNV	0.0088
MT	4323	T	C	SNV	0.0068
MT	4326	T	C	SNV	0.005
MT	4330	T	C	SNV	0.0041
MT	4333	G	A	SNV	0.0045
MT	4337	ATGAGAATCGAACCCATCCC	A	Indel	0.0025
MT	4346	G	A	SNV	0.004
MT	4353	T	C	SNV	0.0116
MT	4360	G	A	SNV	0.0051
MT	4362	A	G	SNV	0.0047
MT	4378	G	A	SNV	0.0035
MT	4384	T	C	SNV	0.0085
MT	4386	T	C	SNV	0.01
MT	4389	C	T	SNV	0.0032
MT	4390	AC	A	Indel	0.0025
MT	4399	T	C	SNV	0.0056
MT	4407	G	A	SNV	0.0041
MT	4408	G	A	SNV	0.0067
MT	4412	G	A	SNV	0.0061
MT	4418	T	C	SNV	0.0076
MT	4421	G	A	SNV	0.0058
MT	4422	C	T	SNV	0.0039
MT	4423	T	C	SNV	0.0064
MT	4427	G	A	SNV	0.0037
MT	4428	G	A	SNV	0.005
MT	4429	GC	G	Indel	0.0025
MT	4435	A	G	SNV	0.0085
MT	4440	G	A	SNV	0.004
MT	4442	A	G	SNV	0.0045
MT	4445	T	C	SNV	0.01
MT	4446	G	A	SNV	0.0034
MT	4449	G	A	SNV	0.0044
MT	4450	G	A	SNV	0.0033
MT	4451	T	C	SNV	0.008
MT	4455	A	G	SNV	0.0055
MT	4464	G	A	SNV	0.0042
MT	4465	T	C	SNV	0.009
MT	4472	TA	T	Indel	0.0025
MT	4474	A	G	SNV	0.0063
MT	4475	TC	T	Indel	0.005
MT	4480	T	C	SNV	0.0081
MT	4487	A	G	SNV	0.01
MT	4491	G	A	SNV	0.0032
MT	4492	T	C	SNV	0.0127
MT	4512	G	A	SNV	0.005
MT	4522	T	C	SNV	0.0106
MT	4525	T	C	SNV	0.0072
MT	4530	G	A	SNV	0.0044
MT	4532	G	A	SNV	0.005
MT	4539	T	C	SNV	0.01
MT	4547	AT	A	Indel	0.005
MT	4550	T	C	SNV	0.0071
MT	4551	T	C	SNV	0.0075
MT	4554	A	G	SNV	0.0063
MT	4556	C	T	SNV	0.0038
MT	4557	T	C	SNV	0.006
MT	4558	G	A	SNV	0.0047
MT	4560	G	A	SNV	0.0106
MT	4561	T	C	SNV	0.0067
MT	4562	A	G	SNV	0.007
MT	4563	G	C	SNV	0.0057
MT	4564	G	A	SNV	0.005
MT	4567	T	C	SNV	0.005
MT	4573	T	C	SNV	0.0071
MT	4576	A	G	SNV	0.0053
MT	4580	G	A	SNV	0.0075
MT	4591	T	C	SNV	0.005
MT	4597	T	C	SNV	0.0105
MT	4598	T	C	SNV	0.0091
MT	4604	C	CA	Indel	0.005
MT	4604	CA	C	Indel	0.005
MT	4621	G	A	SNV	0.003
MT	4623	T	C	SNV	0.01
MT	4631	A	G	SNV	0.005
MT	4632	G	A	SNV	0.0039
MT	4639	T	G	SNV	0.005
MT	4651	T	C	SNV	0.008
MT	4655	G	A	SNV	0.0055
MT	4659	G	A	SNV	0.0048
MT	4665	G	A	SNV	0.007
MT	4668	T	C	SNV	0.0087
MT	4672	T	C	SNV	0.0072
MT	4679	T	C	SNV	0.0085
MT	4681	T	C	SNV	0.0071
MT	4684	T	C	SNV	0.006
MT	4686	G	A	SNV	0.0046
MT	4690	T	C	SNV	0.0125
MT	4691	C	T	SNV	0.004
MT	4695	T	C	SNV	0.0071
MT	4697	C	T	SNV	0.0035
MT	4700	C	T	SNV	0.0047
MT	4702	A	G	SNV	0.005
MT	4706	A	G	SNV	0.01
MT	4710	T	C	SNV	0.01
MT	4713	G	A	SNV	0.0061
MT	4716	C	A	SNV	0.005
MT	4720	G	A	SNV	0.006
MT	4726	T	C	SNV	0.008
MT	4735	C	A	SNV	0.0069
MT	4742	T	C	SNV	0.0098
MT	4746	T	C	SNV	0.0077
MT	4752	T	C	SNV	0.0059
MT	4770	G	A	SNV	0.0048
MT	4773	A	G	SNV	0.0047
MT	4775	A	G	SNV	0.004
MT	4776	G	A	SNV	0.0047
MT	4780	T	C	SNV	0.0079
MT	4786	T	C	SNV	0.0076
MT	4788	G	A	SNV	0.005
MT	4793	A	C	SNV	0.01
MT	4794	G	A	SNV	0.0066
MT	4794	G	GC	Indel	0.0025
MT	4800	T	C	SNV	0.0061
MT	4807	T	C	SNV	0.0075
MT	4812	G	A	SNV	0.005
MT	4813	T	C	SNV	0.0103
MT	4818	G	A	SNV	0.0054
MT	4820	G	A	SNV	0.005
MT	4822	T	C	SNV	0.012
MT	4823	T	C	SNV	0.005
MT	4824	A	G	SNV	0.004
MT	4830	G	A	SNV	0.0036
MT	4831	G	A	SNV	0.005
MT	4848	G	A	SNV	0.0039
MT	4852	T	C	SNV	0.0079
MT	4855	T	C	SNV	0.0095
MT	4856	T	C	SNV	0.0085
MT	4858	T	C	SNV	0.0055
MT	4866	T	C	SNV	0.0075
MT	4876	T	C	SNV	0.0094
MT	4878	G	A	SNV	0.0055
MT	4878	GC	G	Indel	0.005
MT	4891	T	C	SNV	0.0096
MT	4894	T	C	SNV	0.01
MT	4917	A	G	SNV	0.0077
MT	4921	T	C	SNV	0.0074
MT	4924	G	A	SNV	0.0041
MT	4927	T	C	SNV	0.0151
MT	4941	T	C	SNV	0.0112
MT	4947	T	C	SNV	0.0075
MT	4954	T	C	SNV	0.007
MT	4956	A	G	SNV	0.0044
MT	4959	G	A	SNV	0.006
MT	4960	C	T	SNV	0.0047
MT	4962	G	A	SNV	0.0051
MT	4963	G	A	SNV	0.0046
MT	4966	G	A	SNV	0.0038
MT	4967	T	C	SNV	0.0075
MT	4969	G	A	SNV	0.0048
MT	4971	G	A	SNV	0.004
MT	4972	G	A	SNV	0.005
MT	4973	T	C	SNV	0.0085
MT	4974	G	A	SNV	0.0047
MT	4975	G	A	SNV	0.003
MT	4986	A	C	SNV	0.011
MT	4986	A	G	SNV	0.0072
MT	4993	T	C	SNV	0.007
MT	4994	A	G	SNV	0.0046
MT	4997	CA	C	Indel	0.0025
MT	5007	G	A	SNV	0.0027
MT	5016	T	C	SNV	0.007
MT	5020	T	C	SNV	0.0086
MT	5021	T	C	SNV	0.0066
MT	5022	A	G	SNV	0.005
MT	5031	G	A	SNV	0.0045
MT	5032	G	A	SNV	0.006
MT	5038	T	C	SNV	0.005
MT	5041	T	C	SNV	0.003
MT	5043	G	A	SNV	0.0047
MT	5047	T	C	SNV	0.005
MT	5048	T	C	SNV	0.0057
MT	5051	A	G	SNV	0.005
MT	5054	G	A	SNV	0.0057
MT	5055	T	C	SNV	0.0081
MT	5086	CTA	C	Indel	0.0025
MT	5097	A	G	SNV	0.0034
MT	5101	T	C	SNV	0.0058
MT	5102	A	G	SNV	0.0046
MT	5108	T	C	SNV	0.0056
MT	5109	A	G	SNV	0.0084
MT	5115	T	C	SNV	0.0094
MT	5115	T	G	SNV	0.02
MT	5122	T	A	SNV	0.004
MT	5122	T	C	SNV	0.0072
MT	5123	A	G	SNV	0.0069
MT	5136	T	C	SNV	0.009
MT	5139	A	G	SNV	0.0061
MT	5142	ACCACGACCCTAC	A	Indel	0.0025
MT	5147	G	A	SNV	0.0045
MT	5148	A	G	SNV	0.006
MT	5152	T	C	SNV	0.005
MT	5162	T	C	SNV	0.01
MT	5164	G	A	SNV	0.0039
MT	5170	G	A	SNV	0.0037
MT	5170	G	T	SNV	0.0049
MT	5173	A	G	SNV	0.0054
MT	5185	G	A	SNV	0.0047
MT	5196	T	C	SNV	0.0071
MT	5200	T	C	SNV	0.0085
MT	5201	T	C	SNV	0.0141
MT	5203	C	T	SNV	0.004
MT	5208	A	G	SNV	0.0132
MT	5217	T	C	SNV	0.02
MT	5223	G	A	SNV	0.005
MT	5224	G	A	SNV	0.005
MT	5226	G	A	SNV	0.003
MT	5227	G	A	SNV	0.005
MT	5231	G	A	SNV	0.0037
MT	5231	GC	G	Indel	0.005
MT	5239	T	C	SNV	0.0097
MT	5241	A	G	SNV	0.0067
MT	5246	CT	C	Indel	0.005
MT	5247	T	C	SNV	0.0095
MT	5248	T	C	SNV	0.008
MT	5259	T	C	SNV	0.0065
MT	5260	G	A	SNV	0.0047
MT	5262	G	A	SNV	0.004
MT	5262	G	T	SNV	0.0095
MT	5265	AT	A	Indel	0.0025
MT	5266	T	C	SNV	0.0094
MT	5267	T	C	SNV	0.01
MT	5268	A	G	SNV	0.0038
MT	5271	G	A	SNV	0.004
MT	5296	T	C	SNV	0.0129
MT	5299	T	A	SNV	0.0058
MT	5299	T	C	SNV	0.0086
MT	5302	T	C	SNV	0.015
MT	5311	T	C	SNV	0.008
MT	5315	A	C	SNV	0.0168
MT	5325	A	G	SNV	0.0085
MT	5343	T	C	SNV	0.009
MT	5344	T	C	SNV	0.0099
MT	5346	T	C	SNV	0.0072
MT	5347	A	G	SNV	0.005
MT	5348	C	T	SNV	0.0034
MT	5348	C	CT	Indel	0.0025
MT	5350	T	C	SNV	0.005
MT	5356	T	C	SNV	0.0059
MT	5359	T	C	SNV	0.01
MT	5364	T	C	SNV	0.0133
MT	5382	C	T	SNV	0.0034
MT	5390	A	G	SNV	0.005
MT	5391	T	C	SNV	0.01
MT	5398	A	G	SNV	0.006
MT	5400	G	A	SNV	0.004
MT	5412	T	C	SNV	0.0083
MT	5415	C	G	SNV	0.0025
MT	5417	G	A	SNV	0.005
MT	5418	T	C	SNV	0.006
MT	5418	T	G	SNV	0.0083
MT	5436	AC	A	Indel	0.0025
MT	5450	C	T	SNV	0.0474
MT	5458	T	C	SNV	0.0099
MT	5460	G	A	SNV	0.0048
MT	5465	T	C	SNV	0.0079
MT	5469	A	G	SNV	0.006
MT	5471	G	A	SNV	0.0043
MT	5480	A	G	SNV	0.005
MT	5485	T	C	SNV	0.012
MT	5487	T	C	SNV	0.015
MT	5488	C	T	SNV	0.0037
MT	5492	T	C	SNV	0.0082
MT	5495	T	C	SNV	0.01
MT	5503	T	C	SNV	0.0058
MT	5505	A	G	SNV	0.0048
MT	5513	G	C	SNV	0.005
MT	5522	G	A	SNV	0.0063
MT	5523	T	C	SNV	0.0063
MT	5528	T	C	SNV	0.0055
MT	5538	G	A	SNV	0.0065
MT	5553	T	C	SNV	0.0107
MT	5556	G	A	SNV	0.0048
MT	5559	A	G	SNV	0.0035
MT	5561	T	C	SNV	0.005
MT	5563	G	A	SNV	0.0046
MT	5585	G	A	SNV	0.005
MT	5590	G	A	SNV	0.0041
MT	5634	A	G	SNV	0.005
MT	5638	T	C	SNV	0.0052
MT	5641	T	C	SNV	0.005
MT	5645	G	A	SNV	0.0037
MT	5647	T	C	SNV	0.005
MT	5650	G	A	SNV	0.004
MT	5661	A	G	SNV	0.005
MT	5667	G	A	SNV	0.0035
MT	5668	G	A	SNV	0.005
MT	5669	G	A	SNV	0.0073
MT	5672	T	C	SNV	0.0083
MT	5688	T	C	SNV	0.0089
MT	5692	T	C	SNV	0.0054
MT	5698	G	A	SNV	0.0045
MT	5700	TA	T	Indel	0.0025
MT	5703	G	A	SNV	0.004
MT	5705	A	C	SNV	0.02
MT	5709	T	C	SNV	0.0072
MT	5714	A	C	SNV	0.02
MT	5715	A	G	SNV	0.0113
MT	5726	T	C	SNV	0.0125
MT	5729	A	C	SNV	0.0234
MT	5731	T	C	SNV	0.01
MT	5741	G	A	SNV	0.0048
MT	5744	G	A	SNV	0.0044
MT	5746	GA	G	Indel	0.01
MT	5768	G	A	SNV	0.003
MT	5769	G	A	SNV	0.005
MT	5772	G	A	SNV	0.0044
MT	5773	G	A	SNV	0.0034
MT	5774	T	C	SNV	0.0078
MT	5786	T	C	SNV	0.006
MT	5789	T	C	SNV	0.0059
MT	5793	A	G	SNV	0.0075
MT	5793	A	AT	Indel	0.0025
MT	5809	G	A	SNV	0.0043
MT	5821	G	A	SNV	0.0038
MT	5822	G	A	SNV	0.004
MT	5823	A	G	SNV	0.0082
MT	5824	G	A	SNV	0.0035
MT	5829	TA	T	Indel	0.005
MT	5836	A	G	SNV	0.005
MT	5838	G	A	SNV	0.0034
MT	5849	G	A	SNV	0.0047
MT	5850	T	C	SNV	0.008
MT	5856	G	A	SNV	0.0042
MT	5858	T	C	SNV	0.0062
MT	5865	T	C	SNV	0.01
MT	5873	T	C	SNV	0.0065
MT	5881	G	A	SNV	0.0036
MT	5900	A	C	SNV	0.015
MT	5903	G	A	SNV	0.0028
MT	5905	T	C	SNV	0.0052
MT	5906	G	C	SNV	0.0055
MT	5910	G	A	SNV	0.0042
MT	5914	A	G	SNV	0.0056
MT	5917	G	A	SNV	0.0043
MT	5922	CTA	C	Indel	0.0025
MT	5925	T	C	SNV	0.0065
MT	5927	C	T	SNV	0.003
MT	5945	C	T	SNV	0.0033
MT	5949	G	A	SNV	0.0045
MT	5959	A	C	SNV	0.0148
MT	5959	A	G	SNV	0.007
MT	5968	T	C	SNV	0.007
MT	5970	G	A	SNV	0.0057
MT	5973	G	A	SNV	0.0039
MT	5978	A	G	SNV	0.0119
MT	5979	G	A	SNV	0.0074
MT	5986	T	C	SNV	0.011
MT	5991	G	A	SNV	0.0035
MT	5992	G	A	SNV	0.0045
MT	6003	A	G	SNV	0.005
MT	6007	T	C	SNV	0.0075
MT	6011	T	C	SNV	0.0063
MT	6018	G	A	SNV	0.0051
MT	6023	G	A	SNV	0.0027
MT	6025	T	C	SNV	0.005
MT	6028	G	A	SNV	0.0035
MT	6037	G	A	SNV	0.005
MT	6040	A	G	SNV	0.0064
MT	6046	T	C	SNV	0.0075
MT	6060	A	G	SNV	0.005
MT	6070	T	C	SNV	0.01
MT	6070	T	G	SNV	0.0062
MT	6071	T	C	SNV	0.0064
MT	6074	C	A	SNV	0.0073
MT	6086	T	C	SNV	0.01
MT	6092	T	C	SNV	0.008
MT	6093	G	A	SNV	0.0041
MT	6106	T	C	SNV	0.0056
MT	6109	T	C	SNV	0.0048
MT	6111	G	A	SNV	0.0039
MT	6120	A	C	SNV	0.0099
MT	6120	A	G	SNV	0.005
MT	6121	T	C	SNV	0.0071
MT	6125	A	G	SNV	0.0078
MT	6126	A	G	SNV	0.0045
MT	6127	T	C	SNV	0.005
MT	6129	G	A	SNV	0.0046
MT	6130	G	A	SNV	0.0037
MT	6139	G	A	SNV	0.0041
MT	6142	A	G	SNV	0.0035
MT	6144	T	C	SNV	0.0036
MT	6150	G	A	SNV	0.0046
MT	6151	T	C	SNV	0.0068
MT	6160	T	C	SNV	0.0065
MT	6165	G	A	SNV	0.005
MT	6166	G	A	SNV	0.004
MT	6168	G	A	SNV	0.0047
MT	6174	G	C	SNV	0.0063
MT	6174	G	T	SNV	0.005
MT	6177	A	G	SNV	0.005
MT	6179	G	A	SNV	0.004
MT	6183	T	C	SNV	0.015
MT	6204	A	C	SNV	0.0139
MT	6204	A	G	SNV	0.0053
MT	6206	C	T	SNV	0.0031
MT	6208	T	C	SNV	0.01
MT	6210	T	C	SNV	0.0043
MT	6211	G	A	SNV	0.0041
MT	6227	T	C	SNV	0.013
MT	6233	A	C	SNV	0.0382
MT	6235	T	C	SNV	0.01
MT	6243	G	A	SNV	0.004
MT	6249	G	A	SNV	0.0039
MT	6257	G	C	SNV	0.0065
MT	6259	A	G	SNV	0.0079
MT	6260	G	A	SNV	0.0051
MT	6261	G	A	SNV	0.0038
MT	6264	G	A	SNV	0.0045
MT	6265	G	A	SNV	0.0041
MT	6266	A	G	SNV	0.01
MT	6267	G	A	SNV	0.0037
MT	6272	A	G	SNV	0.006
MT	6277	G	A	SNV	0.0031
MT	6293	T	C	SNV	0.0144
MT	6303	G	A	SNV	0.0043
MT	6304	G	A	SNV	0.0045
MT	6305	G	A	SNV	0.003
MT	6315	C	T	SNV	0.0047
MT	6322	G	A	SNV	0.0054
MT	6323	A	G	SNV	0.0069
MT	6324	G	A	SNV	0.0033
MT	6330	G	A	SNV	0.0048
MT	6334	A	C	SNV	0.02
MT	6337	T	C	SNV	0.0079
MT	6343	T	C	SNV	0.0108
MT	6363	G	A	SNV	0.0037
MT	6366	G	A	SNV	0.0031
MT	6366	G	C	SNV	0.0054
MT	6378	T	C	SNV	0.004
MT	6381	G	A	SNV	0.0031
MT	6382	G	A	SNV	0.003
MT	6383	G	A	SNV	0.004
MT	6384	G	A	SNV	0.0038
MT	6393	T	C	SNV	0.0123
MT	6407	T	C	SNV	0.0085
MT	6415	TA	T	Indel	0.005
MT	6416	A	T	SNV	0.0039
MT	6419	A	C	SNV	0.0404
MT	6425	T	C	SNV	0.0075
MT	6426	G	A	SNV	0.0034
MT	6438	T	C	SNV	0.0068
MT	6444	A	C	SNV	0.025
MT	6447	C	T	SNV	0.0025
MT	6451	T	C	SNV	0.02
MT	6456	G	A	SNV	0.0034
MT	6457	T	C	SNV	0.005
MT	6465	G	A	SNV	0.0043
MT	6466	T	C	SNV	0.01
MT	6474	A	C	SNV	0.0121
MT	6477	G	A	SNV	0.0049
MT	6479	A	G	SNV	0.0049
MT	6493	T	C	SNV	0.0063
MT	6495	T	C	SNV	0.0112
MT	6499	T	C	SNV	0.0165
MT	6505	T	C	SNV	0.0145
MT	6513	G	A	SNV	0.0036
MT	6517	G	A	SNV	0.0025
MT	6520	T	C	SNV	0.0061
MT	6521	C	T	SNV	0.003
MT	6524	T	A	SNV	0.0047
MT	6537	G	A	SNV	0.0045
MT	6551	C	T	SNV	0.0029
MT	6555	A	C	SNV	0.025
MT	6555	A	G	SNV	0.0127
MT	6562	TCGA	T	Indel	0.0025
MT	6565	A	G	SNV	0.0141
MT	6570	G	A	SNV	0.0034
MT	6570	G	C	SNV	0.0078
MT	6570	G	T	SNV	0.0068
MT	6572	C	CGGA	Indel	0.0025
MT	6573	G	A	SNV	0.0035
MT	6574	G	A	SNV	0.0041
MT	6577	G	A	SNV	0.0033
MT	6582	G	A	SNV	0.004
MT	6587	C	T	SNV	0.0038
MT	6594	T	C	SNV	0.0047
MT	6605	A	G	SNV	0.0054
MT	6606	T	C	SNV	0.0062
MT	6609	T	C	SNV	0.0072
MT	6612	T	C	SNV	0.0085
MT	6618	G	A	SNV	0.0039
MT	6619	G	A	SNV	0.0025
MT	6620	T	C	SNV	0.0099
MT	6629	A	G	SNV	0.0078
MT	6633	T	C	SNV	0.0056
MT	6635	T	C	SNV	0.0042
MT	6638	T	C	SNV	0.0062
MT	6646	T	C	SNV	0.005
MT	6651	G	A	SNV	0.0047
MT	6657	G	A	SNV	0.0044
MT	6658	G	A	SNV	0.0057
MT	6659	AAT	A	Indel	0.0025
MT	6661	T	A	SNV	0.005
MT	6664	T	C	SNV	0.0065
MT	6675	G	A	SNV	0.0047
MT	6680	T	C	SNV	0.006
MT	6684	T	C	SNV	0.005
MT	6690	G	A	SNV	0.0052
MT	6691	G	GA	Indel	0.01
MT	6691	GA	G	Indel	0.005
MT	6703	C	T	SNV	0.0039
MT	6704	A	G	SNV	0.0055
MT	6708	G	A	SNV	0.0052
MT	6709	G	A	SNV	0.0055
MT	6712	A	G	SNV	0.005
MT	6717	G	A	SNV	0.0055
MT	6718	G	A	SNV	0.0049
MT	6718	G	C	SNV	0.0041
MT	6719	T	C	SNV	0.0077
MT	6720	A	G	SNV	0.005
MT	6722	G	A	SNV	0.0048
MT	6724	T	C	SNV	0.0069
MT	6735	A	C	SNV	0.0077
MT	6741	A	G	SNV	0.0066
MT	6744	G	A	SNV	0.0052
MT	6756	T	C	SNV	0.0068
MT	6757	T	C	SNV	0.0058
MT	6761	C	T	SNV	0.005
MT	6766	G	A	SNV	0.0042
MT	6768	G	A	SNV	0.0042
MT	6772	A	G	SNV	0.0055
MT	6774	CAT	C	Indel	0.0025
MT	6787	T	C	SNV	0.0075
MT	6790	G	A	SNV	0.0046
MT	6791	A	G	SNV	0.0079
MT	6792	A	G	SNV	0.0054
MT	6796	A	G	SNV	0.0085
MT	6798	G	A	SNV	0.0047
MT	6808	G	A	SNV	0.0069
MT	6815	T	C	SNV	0.008
MT	6819	A	C	SNV	0.025
MT	6825	G	A	SNV	0.0045
MT	6826	C	T	SNV	0.0031
MT	6827	T	A	SNV	0.0043
MT	6835	T	C	SNV	0.0076
MT	6840	G	A	SNV	0.0041
MT	6842	T	C	SNV	0.0078
MT	6849	A	G	SNV	0.0125
MT	6849	A	T	SNV	0.0054
MT	6852	G	A	SNV	0.0036
MT	6855	G	A	SNV	0.0036
MT	6856	T	C	SNV	0.0109
MT	6868	G	A	SNV	0.0038
MT	6872	A	G	SNV	0.0116
MT	6876	G	A	SNV	0.0071
MT	6892	G	A	SNV	0.0038
MT	6908	T	C	SNV	0.004
MT	6912	G	A	SNV	0.0086
MT	6915	G	A	SNV	0.004
MT	6919	T	C	SNV	0.0057
MT	6922	G	A	SNV	0.0038
MT	6924	G	A	SNV	0.0028
MT	6932	A	G	SNV	0.0059
MT	6933	T	C	SNV	0.0108
MT	6934	T	C	SNV	0.0073
MT	6945	T	C	SNV	0.0061
MT	6948	A	G	SNV	0.0078
MT	6951	G	A	SNV	0.0045
MT	6952	T	C	SNV	0.0057
MT	6954	G	A	SNV	0.0035
MT	6955	G	A	SNV	0.0048
MT	6956	T	C	SNV	0.0049
MT	6958	G	C	SNV	0.0051
MT	6963	A	G	SNV	0.0075
MT	6967	G	A	SNV	0.0075
MT	6982	A	G	SNV	0.0073
MT	6991	T	C	SNV	0.0051
MT	6996	A	G	SNV	0.0044
MT	6998	C	T	SNV	0.0049
MT	6999	G	A	SNV	0.0033
MT	7008	G	A	SNV	0.0035
MT	7020	G	A	SNV	0.0038
MT	7023	G	A	SNV	0.0025
MT	7024	T	C	SNV	0.005
MT	7026	G	A	SNV	0.0047
MT	7028	C	T	SNV	0.01
MT	7030	A	G	SNV	0.0063
MT	7032	T	C	SNV	0.01
MT	7033	T	C	SNV	0.0075
MT	7041	G	A	SNV	0.003
MT	7053	G	A	SNV	0.0043
MT	7055	A	G	SNV	0.0069
MT	7056	G	C	SNV	0.0056
MT	7074	G	A	SNV	0.0044
MT	7075	G	A	SNV	0.0038
MT	7078	G	A	SNV	0.0034
MT	7080	T	C	SNV	0.0059
MT	7089	T	C	SNV	0.005
MT	7090	G	A	SNV	0.005
MT	7091	A	G	SNV	0.0076
MT	7099	T	C	SNV	0.0084
MT	7106	A	G	SNV	0.0063
MT	7107	G	A	SNV	0.0046
MT	7108	G	A	SNV	0.003
MT	7128	T	C	SNV	0.0074
MT	7146	A	G	SNV	0.0054
MT	7147	CTA	C	Indel	0.0025
MT	7149	A	C	SNV	0.008
MT	7151	CAT	C	Indel	0.0025
MT	7153	T	C	SNV	0.005
MT	7155	T	C	SNV	0.0072
MT	7161	G	A	SNV	0.004
MT	7164	G	A	SNV	0.0047
MT	7171	T	C	SNV	0.005
MT	7180	T	C	SNV	0.015
MT	7189	A	G	SNV	0.0093
MT	7198	G	A	SNV	0.005
MT	7206	G	A	SNV	0.005
MT	7207	G	A	SNV	0.0037
MT	7209	A	G	SNV	0.0058
MT	7211	G	A	SNV	0.0034
MT	7216	G	A	SNV	0.0042
MT	7226	G	A	SNV	0.0054
MT	7236	G	A	SNV	0.0051
MT	7240	C	T	SNV	0.0036
MT	7242	T	C	SNV	0.0063
MT	7243	A	G	SNV	0.0048
MT	7245	A	G	SNV	0.0052
MT	7255	A	G	SNV	0.0063
MT	7263	T	C	SNV	0.0081
MT	7266	T	C	SNV	0.0065
MT	7270	T	C	SNV	0.0059
MT	7272	G	A	SNV	0.005
MT	7273	G	A	SNV	0.0079
MT	7275	T	C	SNV	0.0085
MT	7278	T	C	SNV	0.0064
MT	7291	C	T	SNV	0.005
MT	7292	A	G	SNV	0.0047
MT	7293	G	A	SNV	0.0051
MT	7293	G	C	SNV	0.0058
MT	7299	A	G	SNV	0.005
MT	7300	T	C	SNV	0.005
MT	7302	T	C	SNV	0.005
MT	7306	T	C	SNV	0.0047
MT	7310	T	C	SNV	0.0064
MT	7312	T	C	SNV	0.0049
MT	7317	A	C	SNV	0.01
MT	7318	T	C	SNV	0.008
MT	7325	A	G	SNV	0.0063
MT	7332	G	A	SNV	0.0052
MT	7337	G	A	SNV	0.0047
MT	7342	G	A	SNV	0.0048
MT	7356	G	A	SNV	0.0045
MT	7364	A	G	SNV	0.0069
MT	7368	T	C	SNV	0.01
MT	7381	A	G	SNV	0.0085
MT	7382	G	A	SNV	0.0039
MT	7383	T	G	SNV	0.0201
MT	7385	A	C	SNV	0.0101
MT	7392	G	A	SNV	0.0051
MT	7393	G	A	SNV	0.0041
MT	7395	T	C	SNV	0.01
MT	7396	G	GC	Indel	0.01
MT	7403	A	C	SNV	0.0251
MT	7403	A	G	SNV	0.011
MT	7416	T	C	SNV	0.015
MT	7417	T	C	SNV	0.0125
MT	7424	A	G	SNV	0.0119
MT	7429	T	C	SNV	0.015
MT	7435	T	TAAAATCTAGACAA	Indel	0.0025
MT	7440	T	C	SNV	0.0107
MT	7440	T	G	SNV	0.01
MT	7441	CTA	C	Indel	0.0025
MT	7444	G	A	SNV	0.0076
MT	7448	A	C	SNV	0.016
MT	7454	G	A	SNV	0.005
MT	7457	G	A	SNV	0.0076
MT	7463	G	A	SNV	0.0094
MT	7465	A	AC	Indel	0.005
MT	7465	AC	A	Indel	0.005
MT	7474	A	C	SNV	0.03
MT	7478	G	A	SNV	0.0069
MT	7480	T	C	SNV	0.0148
MT	7483	C	A	SNV	0.0072
MT	7496	T	C	SNV	0.0063
MT	7498	G	A	SNV	0.005
MT	7505	T	C	SNV	0.006
MT	7510	T	C	SNV	0.0078
MT	7511	T	C	SNV	0.0062
MT	7521	G	A	SNV	0.004
MT	7525	T	C	SNV	0.0048
MT	7534	C	T	SNV	0.0033
MT	7536	T	C	SNV	0.0063
MT	7537	T	C	SNV	0.0075
MT	7538	T	C	SNV	0.005
MT	7543	A	G	SNV	0.0058
MT	7544	C	T	SNV	0.0032
MT	7548	G	A	SNV	0.0036
MT	7549	T	A	SNV	0.0068
MT	7552	A	G	SNV	0.0042
MT	7560	T	C	SNV	0.0047
MT	7571	A	G	SNV	0.0063
MT	7572	T	C	SNV	0.0109
MT	7583	T	C	SNV	0.0047
MT	7586	A	G	SNV	0.005
MT	7587	T	C	SNV	0.0063
MT	7588	G	A	SNV	0.0061
MT	7598	G	A	SNV	0.0064
MT	7600	G	A	SNV	0.006
MT	7602	A	C	SNV	0.0081
MT	7605	T	C	SNV	0.0059
MT	7608	G	A	SNV	0.004
MT	7609	T	C	SNV	0.008
MT	7621	T	C	SNV	0.005
MT	7631	A	G	SNV	0.0038
MT	7633	C	T	SNV	0.003
MT	7635	T	C	SNV	0.0054
MT	7644	T	C	SNV	0.0084
MT	7647	T	C	SNV	0.0062
MT	7649	A	G	SNV	0.0066
MT	7652	T	C	SNV	0.0064
MT	7658	G	A	SNV	0.004
MT	7662	A	G	SNV	0.005
MT	7664	G	A	SNV	0.0049
MT	7668	T	C	SNV	0.01
MT	7669	CAT	C	Indel	0.0025
MT	7674	T	C	SNV	0.005
MT	7679	T	C	SNV	0.0081
MT	7683	T	C	SNV	0.005
MT	7689	G	A	SNV	0.004
MT	7697	G	A	SNV	0.0037
MT	7703	T	C	SNV	0.0075
MT	7704	A	G	SNV	0.0055
MT	7706	G	A	SNV	0.0066
MT	7709	C	T	SNV	0.0047
MT	7713	T	C	SNV	0.0075
MT	7722	T	C	SNV	0.015
MT	7732	A	G	SNV	0.0057
MT	7741	T	C	SNV	0.0086
MT	7744	T	C	SNV	0.0088
MT	7748	A	G	SNV	0.0075
MT	7755	A	G	SNV	0.0075
MT	7757	G	A	SNV	0.0046
MT	7764	A	G	SNV	0.0044
MT	7766	A	G	SNV	0.004
MT	7769	G	A	SNV	0.0053
MT	7775	G	A	SNV	0.0049
MT	7776	T	C	SNV	0.0096
MT	7778	T	C	SNV	0.0064
MT	7779	G	A	SNV	0.004
MT	7793	G	A	SNV	0.0048
MT	7797	T	C	SNV	0.01
MT	7803	T	C	SNV	0.0049
MT	7805	G	A	SNV	0.0054
MT	7809	T	C	SNV	0.0115
MT	7811	A	G	SNV	0.006
MT	7814	G	A	SNV	0.0048
MT	7814	G	GC	Indel	0.0025
MT	7822	A	G	SNV	0.0057
MT	7823	T	C	SNV	0.012
MT	7828	A	G	SNV	0.0064
MT	7837	T	C	SNV	0.01
MT	7844	A	AC	Indel	0.0025
MT	7847	G	A	SNV	0.0054
MT	7850	G	A	SNV	0.0046
MT	7851	A	G	SNV	0.0075
MT	7853	G	A	SNV	0.0039
MT	7859	G	A	SNV	0.0032
MT	7861	T	C	SNV	0.0153
MT	7885	T	C	SNV	0.0122
MT	7886	G	A	SNV	0.0054
MT	7887	G	A	SNV	0.0044
MT	7896	G	A	SNV	0.005
MT	7897	G	A	SNV	0.0036
MT	7898	T	C	SNV	0.01
MT	7901	T	C	SNV	0.004
MT	7910	G	A	SNV	0.0043
MT	7912	G	A	SNV	0.0035
MT	7919	G	A	SNV	0.0035
MT	7929	G	A	SNV	0.0045
MT	7938	T	C	SNV	0.0085
MT	7941	A	C	SNV	0.03
MT	7943	T	C	SNV	0.01
MT	7961	T	C	SNV	0.0075
MT	7970	G	A	SNV	0.005
MT	7976	G	A	SNV	0.0047
MT	7977	G	C	SNV	0.0089
MT	7986	G	A	SNV	0.0048
MT	7987	A	C	SNV	0.0303
MT	7987	A	G	SNV	0.0151
MT	7989	T	C	SNV	0.01
MT	7997	G	A	SNV	0.0025
MT	7998	T	C	SNV	0.005
MT	8010	T	C	SNV	0.01
MT	8014	A	G	SNV	0.0077
MT	8016	T	C	SNV	0.0085
MT	8020	G	A	SNV	0.005
MT	8024	G	A	SNV	0.004
MT	8027	G	A	SNV	0.0115
MT	8033	AT	A	Indel	0.0025
MT	8037	G	A	SNV	0.004
MT	8043	T	C	SNV	0.005
MT	8055	A	AC	Indel	0.0025
MT	8057	G	A	SNV	0.0043
MT	8064	T	C	SNV	0.006
MT	8065	G	A	SNV	0.0044
MT	8073	G	A	SNV	0.0042
MT	8075	G	A	SNV	0.0054
MT	8078	G	A	SNV	0.005
MT	8090	G	A	SNV	0.006
MT	8094	T	C	SNV	0.0076
MT	8096	A	G	SNV	0.0043
MT	8105	G	A	SNV	0.0049
MT	8110	T	C	SNV	0.0127
MT	8115	G	A	SNV	0.0038
MT	8118	G	A	SNV	0.0038
MT	8119	T	C	SNV	0.0149
MT	8124	A	G	SNV	0.0081
MT	8143	T	C	SNV	0.0084
MT	8148	G	A	SNV	0.0035
MT	8152	G	A	SNV	0.0061
MT	8153	G	A	SNV	0.0041
MT	8154	G	A	SNV	0.0039
MT	8156	G	A	SNV	0.005
MT	8163	A	G	SNV	0.0045
MT	8172	G	A	SNV	0.005
MT	8174	T	C	SNV	0.0063
MT	8176	T	C	SNV	0.0079
MT	8183	T	C	SNV	0.0047
MT	8187	G	A	SNV	0.0039
MT	8189	G	A	SNV	0.0038
MT	8200	T	C	SNV	0.0135
MT	8211	T	C	SNV	0.0089
MT	8217	T	C	SNV	0.0076
MT	8227	T	C	SNV	0.01
MT	8250	G	A	SNV	0.006
MT	8251	G	A	SNV	0.0044
MT	8255	G	A	SNV	0.0054
MT	8258	T	C	SNV	0.0105
MT	8260	T	C	SNV	0.0078
MT	8265	T	G	SNV	0.0152
MT	8267	T	C	SNV	0.005
MT	8269	G	C	SNV	0.009
MT	8270	CACCCCCTCT	C	Indel	0.005
MT	8271	A	C	SNV	0.035
MT	8277	T	C	SNV	0.025
MT	8277	T	G	SNV	0.0492
MT	8279	T	C	SNV	0.0348
MT	8279	T	G	SNV	0.08
MT	8280	A	C	SNV	0.0507
MT	8288	T	C	SNV	0.01
MT	8300	T	C	SNV	0.0061
MT	8304	G	A	SNV	0.007
MT	8308	A	G	SNV	0.005
MT	8325	T	C	SNV	0.0071
MT	8329	T	C	SNV	0.01
MT	8332	A	G	SNV	0.004
MT	8342	G	A	SNV	0.0072
MT	8348	A	G	SNV	0.0054
MT	8353	T	C	SNV	0.01
MT	8368	G	A	SNV	0.0071
MT	8376	T	C	SNV	0.0075
MT	8378	A	G	SNV	0.0055
MT	8388	T	A	SNV	0.009
MT	8388	T	C	SNV	0.006
MT	8391	G	A	SNV	0.0057
MT	8392	G	A	SNV	0.007
MT	8400	T	C	SNV	0.0117
MT	8407	C	T	SNV	0.0044
MT	8413	A	C	SNV	0.035
MT	8415	T	C	SNV	0.0187
MT	8416	C	T	SNV	0.003
MT	8424	T	C	SNV	0.0115
MT	8426	T	G	SNV	0.07
MT	8435	A	C	SNV	0.02
MT	8435	A	G	SNV	0.007
MT	8450	T	C	SNV	0.0079
MT	8459	A	C	SNV	0.04
MT	8464	C	T	SNV	0.003
MT	8472	C	T	SNV	0.005
MT	8473	T	C	SNV	0.0307
MT	8485	G	A	SNV	0.0061
MT	8503	T	C	SNV	0.0095
MT	8508	A	G	SNV	0.004
MT	8512	A	G	SNV	0.0097
MT	8516	T	C	SNV	0.0081
MT	8519	G	A	SNV	0.0092
MT	8527	A	G	SNV	0.005
MT	8537	A	G	SNV	0.0076
MT	8539	CTG	C	Indel	0.0025
MT	8548	T	C	SNV	0.0061
MT	8552	T	C	SNV	0.013
MT	8555	T	C	SNV	0.0136
MT	8564	C	CT	Indel	0.0025
MT	8567	T	C	SNV	0.025
MT	8573	G	A	SNV	0.005
MT	8577	A	G	SNV	0.0088
MT	8581	G	A	SNV	0.0051
MT	8584	G	A	SNV	0.0058
MT	8597	T	G	SNV	0.0344
MT	8600	T	C	SNV	0.008
MT	8603	T	G	SNV	0.0367
MT	8604	T	TC	Indel	0.0042
MT	8612	T	C	SNV	0.0096
MT	8613	A	C	SNV	0.0307
MT	8618	T	C	SNV	0.015
MT	8618	TC	T	Indel	0.0025
MT	8619	C	A	SNV	0.0104
MT	8623	A	G	SNV	0.0068
MT	8632	T	C	SNV	0.0165
MT	8634	T	C	SNV	0.0134
MT	8648	G	A	SNV	0.0058
MT	8651	T	C	SNV	0.009
MT	8654	T	C	SNV	0.0192
MT	8657	C	T	SNV	0.0043
MT	8659	A	G	SNV	0.0112
MT	8669	G	A	SNV	0.0063
MT	8683	A	G	SNV	0.007
MT	8701	A	G	SNV	0.0036
MT	8705	T	C	SNV	0.012
MT	8710	A	C	SNV	0.0111
MT	8711	A	C	SNV	0.0192
MT	8711	A	G	SNV	0.0059
MT	8729	G	A	SNV	0.0041
MT	8730	A	G	SNV	0.0046
MT	8743	G	A	SNV	0.0048
MT	8744	T	C	SNV	0.0098
MT	8746	T	C	SNV	0.0108
MT	8753	T	C	SNV	0.0059
MT	8755	AT	A	Indel	0.0025
MT	8756	T	C	SNV	0.005
MT	8772	T	C	SNV	0.007
MT	8774	A	G	SNV	0.0136
MT	8775	C	T	SNV	0.005
MT	8777	T	C	SNV	0.0163
MT	8780	T	C	SNV	0.0104
MT	8782	G	A	SNV	0.003
MT	8783	G	A	SNV	0.005
MT	8790	G	A	SNV	0.0041
MT	8793	T	C	SNV	0.0104
MT	8817	A	G	SNV	0.008
MT	8836	A	G	SNV	0.0075
MT	8837	T	C	SNV	0.0073
MT	8839	G	A	SNV	0.0051
[truncated: 1,692 more rows]
