# Supplementary material for: Mitochondrial DNA mosaicism in human normal somatic cells
Source: Research Square preprint supplement (doi:10.21203/rs.3.rs-3602675/v1), 2023-11-21
Supplement: Supplementary file 5 [file 53ea51c5f470bf423fba631c.xlsx]

## Sheet: SuppleTable_tumor_profiles
Supplementary Table 10. Demographic and mutational characteristics of adenomas and tumors
The following metadata is reported for each sample: patientID = patient identifier (PCAWG : donor_unique_id); sampleID = sample identifier (PCAWG : tumor_wgs_submitter_sample_id); sample type = adenoma/tumor; purity = purity of tumor sample; ploidy = ploidy of tumor sample; histology = histology; age = age; gender = gender (M for male, F for female); mtDNA_depth = average read-depth of the mitoch…
patientID	sampleID	sample type	purity	ploidy	histology	age	gender	mtDNA_depth	nDNA_depth	mtCN	varN	homoN	note
HC22	HC22-02	adenoma	NA	NA	MUTYH-associated familial adenomatous polyposis	38	F	3579.06	32.05	234.509	3	0	clone
HC22	HC22-03	adenoma	NA	NA	MUTYH-associated familial adenomatous polyposis	38	F	3550.09	32.27	220.024	2	0	clone
HC22	HC22-04	adenoma	NA	NA	MUTYH-associated familial adenomatous polyposis	38	F	5531.94	27.15	468.636	2	1	clone
HC22	HC22-01	adenoma	NA	NA	MUTYH-associated familial adenomatous polyposis	38	F	6506.59	45.53	300.106	5	0	clone
HC22	HC22-06	adenoma	NA	NA	MUTYH-associated familial adenomatous polyposis	38	F	3666.24	28.07	274.282	2	0	clone
HC22	HC22-07	adenoma	NA	NA	MUTYH-associated familial adenomatous polyposis	38	F	7316.86	32.61	471.187	3	0	clone
HC22	HC22-08	adenoma	NA	NA	MUTYH-associated familial adenomatous polyposis	38	F	6121.81	46.46	276.707	1	1	clone
HC22	HC22-05	adenoma	NA	NA	MUTYH-associated familial adenomatous polyposis	38	F	1758.53	29.85	117.824	6	0	clone
HC22	HC22-10	adenoma	NA	NA	MUTYH-associated familial adenomatous polyposis	38	F	5160.51	34.72	356.717	3	1	clone
HC22	HC22-11	adenoma	NA	NA	MUTYH-associated familial adenomatous polyposis	38	F	5987.01	38.28	312.801	2	0	clone
HC22	HC22-12	adenoma	NA	NA	MUTYH-associated familial adenomatous polyposis	38	F	3060.37	28.1	261.384	3	1	clone
HC22	HC22-09	adenoma	NA	NA	MUTYH-associated familial adenomatous polyposis	38	F	5914.49	32.34	365.769	1	0	clone
HC01	HC01_tumor	tumor	0.56	2.2	Colorectal cancer	61	M	10729.7	30.0568	753.943	3	0	bulk
HC02	HC02_tumor	tumor	0.14	2.6	Colorectal cancer	77	M	4233.74	28.8408	305.925	3	0	bulk
HC03	HC03_tumor	tumor	0.69	2.2	Colorectal cancer	88	M	12561.9	27.2027	987.304	8	0	bulk
HC04	HC04_tumor	tumor	0.15	2.6	Colorectal cancer	70	M	10642	34.1294	651.69	8	0	bulk
HC05	HC05_tumor	tumor	0.62	2.1	Colorectal cancer	62	F	23463.7	35.435	1365.38	6	0	bulk
HC06	HC06_tumor	tumor	0.53	3.8	Colorectal cancer	54	M	11686.8	27.7381	1244.6	1	0	bulk
HC08	HC08_tumor	tumor	0.7	2.6	Colorectal cancer	53	F	12085.7	27.8193	1051.33	15	2	bulk
HC09	HC09_tumor	tumor	0.23	2.7	Colorectal cancer	65	M	10522.4	30.5447	744.447	8	0	bulk
HC10	HC10_tumor	tumor	0.56	2.1	Colorectal cancer	37	M	19155.2	81.2033	484.994	1	0	bulk
HC12	HC12_tumor	tumor	0.27	2.2	Colorectal cancer	84	F	5326.8	31.3186	349.353	13	0	bulk
HC13	HC13_tumor	tumor	0.18	2.7	Colorectal cancer	71	M	3940.39	36.065	232.283	11	0	bulk
HC14	HC14_tumor	tumor	0.79	2.1	Colorectal cancer	46	F	17537.2	29.5318	1234.6	5	0	bulk
HC15	HC15_tumor	tumor	0.49	3.8	Colorectal cancer	56	F	19210.7	36.2818	1525.98	6	0	bulk
HC16	HC16_tumor	tumor	0.66	2.1	Colorectal cancer	63	F	11883.6	28.508	861.215	4	1	bulk
HC17	HC17_tumor	tumor	0.53	2.5	Colorectal cancer	64	F	22538.9	39.0768	1306.42	5	0	bulk
HC18	HC18_tumor	tumor	0.65	2.2	Colorectal cancer	66	F	10373.7	28.7365	768.917	7	0	bulk
HC19	HC19_tumor	tumor	0.68	3.2	Colorectal cancer	73	M	12717.4	34.2057	1046.97	5	0	bulk
HC20	HC20_tumor	tumor	0.64	3.1	Colorectal cancer	45	F	11021	28.7075	1038.08	3	0	bulk
HC21	HC21_tumor	tumor	0.33	3.1	Colorectal cancer	52	F	7702.51	34.4081	528.975	6	0	bulk
COAD-US::0cb0dac8-4ce2-444a-b1ae-1550e065b4d9	31f02f48-44a4-445e-ac3d-e9bf3d8d25a2	tumor	0.819	1.928	Colorectal cancer	59	M	3023.99	28.2134	208.045	8	2	bulk; PCAWG
COAD-US::268c01b3-d2ce-44c0-a2fe-ea846a1253cc	2df02f2b-9f1c-4249-b3b4-b03079cd97d9	tumor	0.438	1.929	Colorectal cancer	57	M	7059.3	67.669	205.398	6	0	bulk; PCAWG
COAD-US::2e386e48-b99b-4806-a3e3-081d72a606e7	b7f2e85a-3c6a-48b7-8a4f-2dec1d85359d	tumor	0.639	2.864	Colorectal cancer	80	F	18137.2	42.7866	1081.83	5	0	bulk; PCAWG
COAD-US::300fff5a-0f61-402d-b845-3938ba7b1294	10ad692b-4c3d-42de-9b5e-4968441388b3	tumor	0.844	2.144	Colorectal cancer	61	F	5209.52	72.2366	153	1	0	bulk; PCAWG
COAD-US::33e989b9-fac4-47d8-b429-269044ac772a	93ff786e-0165-4b02-8d27-806d422e93fc	tumor	0.723	1.929	Colorectal cancer	65	M	17745.7	60.6412	570.247	2	0	bulk; PCAWG
COAD-US::36eaf209-c332-4321-b6aa-51a3368ecd79	154f80bd-984c-4792-bb89-20c4da0c08e0	tumor	0.709	2	Colorectal cancer	81	F	6944.34	64.824	214.252	2	0	bulk; PCAWG
COAD-US::490eabca-4575-4bd6-9604-6b6e23d069ce	8a929c55-35a6-4645-bb70-4b85d281b139	tumor	0.725	4.022	Colorectal cancer	68	F	6707.87	70.0668	331.814	0	0	bulk; PCAWG
COAD-US::5116e3b4-2bac-40f5-8046-b9c1783faaa5	f38b5d2e-5cab-45c7-bb0a-38b2efc5c156	tumor	0.5	3.094	Colorectal cancer	53	F	23325.5	43.1096	1378.12	2	0	bulk; PCAWG
COAD-US::58facedb-fcb8-4ecf-8338-2bfa4947acef	00aa769d-622c-433e-8a8a-63fb5c41ea42	tumor	0.558	1.943	Colorectal cancer	31	M	9990.91	73.0163	269.31	3	0	bulk; PCAWG
COAD-US::5e7074a6-5011-4dc5-950c-41365dbc6d09	42d20028-0ddc-4dac-9f05-d674f8915f21	tumor	0.468	1.92	Colorectal cancer	58	M	6901.69	71.7953	188.661	5	0	bulk; PCAWG
COAD-US::74a0264d-1d31-430d-9a88-e7334c8aa96c	d3d65db3-36f9-41c7-8e5e-1683ce94dfcb	tumor	0.706	3.059	Colorectal cancer	57	M	4840.17	71.7579	185.333	1	0	bulk; PCAWG
COAD-US::750770db-53cf-4021-a8c2-5e0ddb97fef5	d9690a27-bb02-498e-b15c-ee76e31d16ee	tumor	0.765	2.123	Colorectal cancer	69	M	16684.5	31.3899	1113.06	10	0	bulk; PCAWG
COAD-US::790266bc-c252-43f4-85d1-1b06ee529cf8	492b4e58-12e2-47b2-bd47-28f8607072fa	tumor	0.39	2.097	Colorectal cancer	55	F	4979.25	71.9847	140.959	5	0	bulk; PCAWG
COAD-US::7b47489f-c3cc-4388-b5d7-c7c02790a5f6	3c019b2f-52ec-40a8-99b5-98c1423ce627	tumor	0.529	2.072	Colorectal cancer	65	M	21645.5	42.8787	1028.84	2	0	bulk; PCAWG
COAD-US::7d8eab0a-e6c8-4449-9ebf-50c41db94a06	d3daf373-1485-455e-a0a1-8e33d215d623	tumor	0.69	2.017	Colorectal cancer	73	F	21996.3	45.0733	981.748	2	0	bulk; PCAWG
COAD-US::84e34cf2-b3bb-4a1a-8fb7-6c2c604c4008	a64000df-16e5-4b88-865f-5c680adf60eb	tumor	0.876	2.09	Colorectal cancer	47	F	3466.26	36.2423	198.823	3	0	bulk; PCAWG
COAD-US::857a5889-19e7-4208-8362-f1377c408037	05486349-24a4-4931-bf5f-c9fefe369af2	tumor	0.72	1.749	Colorectal cancer	56	M	6121.73	72.4014	153.825	5	0	bulk; PCAWG
COAD-US::9f45a227-1fd5-478c-a194-4a5c61b68cc3	4cfb0aee-6661-478a-8694-9d8ba15e46b7	tumor	0.616	3.324	Colorectal cancer	55	F	8710.87	70.5692	347.548	4	1	bulk; PCAWG
COAD-US::a06c09a8-0951-49f4-a765-5147bbcae109	b6b6e1d3-c592-4836-bdad-d53af2dbcc9a	tumor	0.857	2.122	Colorectal cancer	74	M	13616.2	31.0254	923.631	8	0	bulk; PCAWG
COAD-US::a435fdf4-a89a-499e-9006-cbb5693eab26	b2afbcba-d67d-43f1-be3b-05f3a5836ec0	tumor	0.757	2.179	Colorectal cancer	73	M	3192.87	31.7536	214.728	13	0	bulk; PCAWG
COAD-US::a512701f-88bb-4b05-8c94-fd285b9dd13e	6051f40a-99e5-4461-9255-0e70d757b4d5	tumor	0.784	2.766	Colorectal cancer	68	M	13539.5	38.4743	915.158	8	1	bulk; PCAWG
COAD-US::bfb07784-693b-4c25-874e-4ad6e04a5d46	9e5f0a23-e184-4611-b42b-e882dcf23acd	tumor	0.581	2.207	Colorectal cancer	78	F	26884.6	43.7139	1303.99	6	0	bulk; PCAWG
COAD-US::c83d38fc-e011-4f75-a100-96513611f3e9	e3ef5cad-4d6e-4f04-babb-a908ee02644b	tumor	0.571	3.791	Colorectal cancer	64	F	6278.54	67.2482	282.207	5	0	bulk; PCAWG
COAD-US::ca22edd4-eb7c-4677-84aa-6f0354459a19	05780d48-80e7-4d70-b00c-081f8a9519f2	tumor	0.48	2.066	Colorectal cancer	64	F	1878.71	33.0713	115.415	3	0	bulk; PCAWG
COAD-US::d3b7ada6-5395-4212-a921-8e97c92b605d	55345803-83d4-4fdb-b0ee-328753801da1	tumor	0.609	1.853	Colorectal cancer	69	M	17057.4	70.4535	462.543	4	1	bulk; PCAWG
COAD-US::d8e9ea52-ff28-4626-baa3-71350fd53ddf	080ecc31-756a-4a1b-a51e-d632ac8219f7	tumor	0.54	3.72	Colorectal cancer	74	F	6336.24	69.6345	266.5	4	0	bulk; PCAWG
COAD-US::dca004bf-9c14-45a1-b186-ab3759f6c7fe	85e29049-a5e8-49fa-a576-e113c7b2c2e3	tumor	0.614	2.637	Colorectal cancer	69	M	17039.9	42.9916	947.73	9	0	bulk; PCAWG
COAD-US::dd7a53ee-cb08-40c4-9935-51d1ca17e9e8	63bc376e-5a3d-44fd-8d77-686dfc41e458	tumor	0.177	2.096	Colorectal cancer	34	F	6242.31	72.2186	174.341	0	0	bulk; PCAWG
COAD-US::ddf69ed9-4c53-48b8-9f01-495bd60c3425	a0f94565-9169-49ee-8e6a-21bdc43d9de6	tumor	0.766	2.063	Colorectal cancer	81	F	21975.9	38.5632	1167.23	12	0	bulk; PCAWG
COAD-US::df228c56-89ac-4122-93b3-6c0740c4ec09	66701395-5a53-41bb-866b-3bbf08bc33ab	tumor	0.77	2.422	Colorectal cancer	78	F	11744.9	35.9258	760.072	7	1	bulk; PCAWG
COAD-US::df5ab6cc-6f68-4b6b-95e2-954c6b57ba9c	0980e7fd-051d-45e9-9ca6-2baf073da4e8	tumor	0.48	2.016	Colorectal cancer	46	M	6751	74.8372	181.111	2	0	bulk; PCAWG
COAD-US::e457344d-76fb-46bf-b362-61a6e811d131	6ca5c1bb-275b-4d05-948a-3c6c7d03fab9	tumor	0.46	1.938	Colorectal cancer	75	M	5380.74	64.7245	163.895	11	0	bulk; PCAWG
COAD-US::e8ec26bd-c88d-42b9-ac8a-ab121b8140f8	d0a0d845-32e2-4590-b909-29bd27b92900	tumor	0.818	2.497	Colorectal cancer	51	M	7297.55	74.403	236.037	3	1	bulk; PCAWG
COAD-US::f87c6dcc-1a9e-4df5-962c-1f946e2611f8	75ad15b9-8f9c-40c1-9ca6-1e8454fbd310	tumor	0.703	3.688	Colorectal cancer	63	F	3788.14	39.1078	308.673	2	0	bulk; PCAWG
COAD-US::fafd4576-0709-49e1-926f-ad1ee09907ec	fc453f67-6623-4e8c-b519-0bd79e4d4651	tumor	0.878	3.928	Colorectal cancer	57	F	20795.1	38.6853	1985.04	0	0	bulk; PCAWG
COAD-US::ff1407c6-9174-4bae-a19b-d34ca71b898c	2cdc4cce-0877-4ec1-85f5-20c909912e65	tumor	0.616	3.12	Colorectal cancer	72	F	15729.7	47.6092	888.728	3	0	bulk; PCAWG
READ-US::0bb786ee-07cf-4853-9b49-ec95cd14e282	cd3d7559-b583-4474-81df-4bf9232de3c2	tumor	0.664	3.329	Colorectal cancer	68	M	3591.1	44.1397	234.51	2	0	bulk; PCAWG
READ-US::0eda7373-8335-455f-b90a-8c3540f28088	ecf4e05a-0912-4b93-ad66-323002f0c845	tumor	0.83	2.22	Colorectal cancer	89	F	26835.5	30.5199	1919.11	5	1	bulk; PCAWG
READ-US::10290e91-9784-4f94-8daa-b5d9a8b0efb9	faff4626-615b-416a-b7a6-9d177dcc94a9	tumor	0.689	3.581	Colorectal cancer	72	F	10967.3	35.8145	946.024	3	1	bulk; PCAWG
READ-US::1388bba1-02ba-40df-93e5-c3d58b7bbae0	aa06ae46-2336-4666-a3af-fc790daf8da4	tumor	0.805	2.94	Colorectal cancer	85	F	14887.3	42.7355	960.322	7	0	bulk; PCAWG
READ-US::1586cb0a-081a-4364-9470-46f9d0f0167d	7d59205a-65ec-4341-9748-28639d82ed29	tumor	0.458	1.941	Colorectal cancer	67	F	18446.1	50.2669	724.01	3	0	bulk; PCAWG
READ-US::335d0351-3740-4847-9ff4-be2f078c70f7	5b180356-cf58-4fad-a3d4-00fc12b43fcc	tumor	0.62	3.264	Colorectal cancer	41	F	15159.6	43.7984	963.494	6	0	bulk; PCAWG
READ-US::72802851-9340-4c5f-a90b-23b7afd7577a	428c100f-d7d0-4860-a8fc-2bae6a4bba95	tumor	0.538	4.06	Colorectal cancer	63	M	23995.9	44.866	1662.42	1	0	bulk; PCAWG
READ-US::830fd359-abd4-4c99-89e4-2d6bb9ce5637	81b1e78c-6032-4ff4-b52a-83456b9450ea	tumor	0.281	3.912	Colorectal cancer	48	F	25878.9	46.217	1420.73	6	0	bulk; PCAWG
READ-US::8e00e7e7-ffaf-44f0-91a7-172671f18e08	8da641e4-9b12-4163-bd1e-9d5af91e5186	tumor	0.689	3.489	Colorectal cancer	87	M	17366.7	48.8242	1076.32	4	0	bulk; PCAWG
READ-US::8feb0e8f-d09b-437d-8651-0cdecfe776bf	14c5b81d-da49-4db1-9834-77711c2b1d38	tumor	0.839	1.988	Colorectal cancer	57	M	16636.2	69.2401	478.118	13	0	bulk; PCAWG
READ-US::9af35239-ffb9-4d4f-889e-f743da271eef	14334aea-2dae-428c-9d4a-1a37878dfc3f	tumor	0.631	2.521	Colorectal cancer	85	F	20884.6	49.5047	982.433	8	0	bulk; PCAWG
READ-US::db1e3104-8bfd-4353-854a-c478ba1f7d07	d452293a-6148-4fcf-9fbc-446815016751	tumor	0.749	3.05	Colorectal cancer	75	M	17073.4	28.5831	1664.42	4	1	bulk; PCAWG
READ-US::e2d395f8-bf13-4fe4-8031-683b0eedd875	03cff38d-7e29-4409-a508-749bddb1b3df	tumor	0.538	3.119	Colorectal cancer	62	M	21701.6	48.6618	1160.42	4	0	bulk; PCAWG
READ-US::e5e4aa9f-6015-4d62-a088-69920d7f2500	bb6150f7-23e4-40f2-b466-6b6edd19c502	tumor	0.76	3.438	Colorectal cancer	71	F	11440.6	30.0791	1176.38	6	0	bulk; PCAWG
READ-US::e6827400-0d95-46b0-8874-6ce9e9d5011b	786fc3e4-e2bf-4914-9251-41c800ebb2fa	tumor	0.879	1.912	Colorectal cancer	78	F	9995.94	29.8192	644.507	5	1	bulk; PCAWG
