# Supplementary material for: Mitochondrial DNA mosaicism in human normal somatic cells
Source: Research Square preprint supplement (doi:10.21203/rs.3.rs-3602675/v1), 2023-11-21
Supplement: Supplementary file 6 [file 5ab0741374cc225f4f97ed70.xlsx]

## Sheet: Sheet1
Supplementary Table 5. Summary of mtDNA alteration classification
The following metadata is reported for each heteroplasmic mtDNA alteration: clone count = the number of clones for each tissue; total variant = total number of heteroplasmic mtDNA variants identified; shared variant = the number of heteroplasmic mtDNA variants shared between clones of an individual; HetFE = fertilized-egg originated variant; false-positive = false-positive of HetFE variant due to…
			Colorectal epithelium	Colorectal epithelium (abortus)	Fibroblast	HSC	Total
clone count			405	26	334	1331	2096
total variant		all	1665	48	1199	3539	6451
		collapsed	1625	10	1007	2982	5624
shared variant		all	76	42	302	916	1336
		collapsed	36	4	110	359	509
HetFE	ALL	all	58	42	78	231	409
		collapsed	34	4	28	87	153
	strong evidence (when collapsed)	1) found in blood	18	0	8	0	26
		2) found in an individual	10	4	7	58	79
		1 & 2	7	0	4	0	11
		total	21	4	11	58	94
	others		13	0	17	29	59
false-positive	phasing error		0	0	0	5	5
hotspot	ALL	all	62	0	142	186	390
		collapsed	54	0	68	74	196
	shared	all	16	0	100	163	279
		collapsed	8	0	26	51	85
coincidental		all	10	0	21	345	376
		collapsed	5	0	10	167	182
late-branching		all	6	0	107	177	290
		collapsed	3	0	50	54	107
sporadic		all	1545	6	979	3122	5652
		collapsed	1537	6	911	2821	5275
average variant count		total variant count/clone count	4.11111	1.84615	3.58982	2.6589	3.07681
		sporadic mutation count/clone count	3.81481	0.230769	2.93114	2.3456	2.69561
