# Supplementary material for: Mitochondrial DNA mosaicism in human normal somatic cells
Source: Research Square preprint supplement (doi:10.21203/rs.3.rs-3602675/v1), 2023-11-21
Supplement: Supplementary file 7 [file 868cd99f8c60e0a8a2da15ba.xlsx]

## Sheet: SuppleTable_fe_mutations
Supplementary Table 6. Fertilized egg originated variants classified in this study
The following metadata is reported for each HetFE variant: patientID = patient identifier; CHROM = chromosome; POS = position; REF = reference allele; ALT = alternative allele; caVAF = average VAF in whole clones of the individual (0-1); VAF list = a list of VAF (>0.003) in the individual (seperated by semicolon); cloneN = the number of clones with the identified HetFE variant in the individual; …
patientID	CHROM	POS	REF	ALT	caVAF	VAF list	cloneN	total_cloneN	consequence	region	tissue
HC01	MT	13916	G	A	0.0953652	0.9829 ; 0.1518 ; 0.9859	3	23	missense	MT-ND5	Colorectal epithelium
HC01	MT	15170	G	A	0.000904348	0.0086 ; 0.0122	2	23	truncating	MT-CYB	Colorectal epithelium
HC01	MT	1918	G	A	0.0017087	0.0183 ; 0.021	2	23	intergenic	MT-RNR2	Colorectal epithelium
HC01	MT	5262	G	A	0.000543478	0.0084 ; 0.0041	2	23	missense	MT-ND2	Colorectal epithelium
HC02	MT	15737	G	A	0.000472727	0.0104	1	22	missense	MT-CYB	Colorectal epithelium
HC02	MT	5162	T	C	0.0927682	0.9987 ; 0.9977	2	22	synonymous	MT-ND2	Colorectal epithelium
HC02	MT	9755	G	A	0.0277273	0.5964	1	22	synonymous	MT-CO3	Colorectal epithelium
HC04	MT	11729	T	C	0.00144783	0.0333	1	23	missense	MT-ND4	Colorectal epithelium
HC04	MT	2129	G	A	0.00436522	0.0157 ; 0.0847	2	23	intergenic	MT-RNR2	Colorectal epithelium
HC04	MT	2978	T	C	0.00076087	0.0175	1	23	intergenic	MT-RNR2	Colorectal epithelium
HC04	MT	8152	G	A	0.0324304	0.7459	1	23	synonymous	MT-CO2	Colorectal epithelium
HC05	MT	1362	G	A	0.00269583	0.0536	1	24	intergenic	MT-RNR1	Colorectal epithelium
HC05	MT	1748	G	A	0.00167083	0.0401	1	24	intergenic	MT-RNR2	Colorectal epithelium
HC05	MT	4412	G	A	0.00126667	0.0085 ; 0.0219	2	24	intergenic	MT-TM	Colorectal epithelium
HC06	MT	6712	A	G	0.0528	0.6858 ; 0.423	2	22	missense	MT-CO1	Colorectal epithelium
HC08	MT	4148	G	A	0.0406217	0.0229	1	23	missense	MT-ND1	Colorectal epithelium
HC08	MT	4201	G	A	0.00757826	0.0102 ; 0.1641	2	23	missense	MT-ND1	Colorectal epithelium
HC08	MT	6378	T	C	0.0718217	0.0042 ; 0.7021 ; 0.006 ; 0.9288	4	23	synonymous	MT-CO1	Colorectal epithelium
HC08	MT	7543	A	G	0.00538696	0.1239	1	23	intergenic	MT-TD	Colorectal epithelium
HC09	MT	236	T	C	0.0511524	0.9964	1	21	intergenic	D-loop	Colorectal epithelium
HC09	MT	3697	G	A	0.00239524	0.033 ; 0.0173	2	21	missense	MT-ND1	Colorectal epithelium
HC10	MT	15437	G	A	0.000935	0.0143 ; 0.0044	2	20	missense	MT-CYB	Colorectal epithelium
HC10	MT	183	A	G	0.007845	0.0328 ; 0.1241	2	20	intergenic	D-loop	Colorectal epithelium
HC10	MT	2377	G	A	0.005825	0.0108 ; 0.1057	2	20	intergenic	MT-RNR2	Colorectal epithelium
HC12	MT	966	A	C	0.0209273	0.3469 ; 0.1135	2	22	intergenic	MT-RNR1	Colorectal epithelium
HC15	MT	7382	G	A	0.00515217	0.0529	1	23	synonymous	MT-CO1	Colorectal epithelium
HC16	MT	5703	G	A	0.00131667	0.0237	1	18	intergenic	MT-TN	Colorectal epithelium
HC17	MT	4408	G	A	0.00147143	0.0084 ; 0.0122	2	14	intergenic	MT-TM	Colorectal epithelium
HC19	MT	5364	T	C	0.0229435	0.0284 ; 0.4993	2	23	missense	MT-ND2	Colorectal epithelium
HC19	MT	7496	T	C	0.138017	0.9997 ; 0.9996 ; 0.9992	3	23	intergenic	MT-TS1	Colorectal epithelium
HC21	MT	1206	G	A	0.000518182	0.0038 ; 0.0076	2	23	intergenic	MT-RNR1	Colorectal epithelium
HC21	MT	14904	T	C	0.00809545	0.1675	1	23	missense	MT-CYB	Colorectal epithelium
HC21	MT	4298	G	A	0.0201182	0.4196 ; 0.023	2	23	intergenic	MT-TI	Colorectal epithelium
HC21	MT	7292	A	G	0.0454455	0.9933	1	23	synonymous	MT-CO1	Colorectal epithelium
SA03	MT	248	A	G	0.0127154	0.1656 ; 0.165	2	26	intergenic	D-loop	Colorectal epithelium
SA03	MT	608	A	G	0.0102577	0.0201 ; 0.0155 ; 0.0129 ; 0.0935 ; 0.0173 ; 0.0146 ; 0.0134 ; 0.0182 ; 0.0253 ; 0.0359	10	26	intergenic	MT-TF	Colorectal epithelium
SA03	MT	6142	A	G	0.0106731	0.0246 ; 0.08 ; 0.0335 ; 0.0368 ; 0.0328 ; 0.0698	6	26	missense	MT-CO1	Colorectal epithelium
SA03	MT	8416	C	T	0.0632923	0.058 ; 0.1667 ; 0.0117 ; 0.0553 ; 0.0121 ; 0.0089 ; 0.2425 ; 0.0743 ; 0.0546 ; 0.0247 ; 0.0863 ; 0.0484 ; 0.0585 ; 0.0648 ; 0.0284 ; 0.0866 ; 0.0401 ; 0.1202 ; 0.108 ; 0.0479 ; 0.0606 ; 0.0686 ; 0.1127 ; 0.0057	24	26	synonymous	MT-ATP8	Colorectal epithelium
DB10	MT	150	C	T	0.000786842	0.0104 ; 0.0195	2	39	intergenic	D-loop	Fibroblast
DB10	MT	16256	C	T	0.320158	0.987 ; 0.9677 ; 0.9901 ; 0.9844 ; 0.9881 ; 0.9827 ; 0.9904 ; 0.99 ; 0.9746 ; 0.6107 ; 0.9864 ; 0.4906 ; 0.9862 ; 0.2371	14	39	intergenic	D-loop	Fibroblast
DB10	MT	9531	A	G	0.0278763	0.998 ; 0.0613	2	39	missense	MT-CO3	Fibroblast
DB10	MT	9756	T	C	0.00225789	0.0543 ; 0.0315	2	39	missense	MT-CO3	Fibroblast
DB2	MT	15880	A	G	0.0310864	0.6839	1	27	synonymous	MT-CYB	Fibroblast
DB2	MT	16400	C	T	0.428291	0.9925 ; 0.9886 ; 0.9603 ; 0.9897 ; 0.9911 ; 0.5221 ; 0.3557 ; 0.6492 ; 0.9928 ; 0.5167 ; 0.9931 ; 0.9952 ; 0.9943 ; 0.9915	14	27	intergenic	D-loop	Fibroblast
DB3	MT	15649	A	G	0.0599	0.9932 ; 0.9835	2	43	synonymous	MT-CYB	Fibroblast
DB3	MT	2876	G	A	0.00160303	0.0244 ; 0.0285	2	43	intergenic	MT-RNR2	Fibroblast
DB3	MT	9554	G	A	0.0011303	0.0103 ; 0.027	2	43	synonymous	MT-CO3	Fibroblast
DB6	MT	10161	A	G	0.0112464	0.9739 ; 0.2857	2	115	missense	MT-ND3	Fibroblast
DB6	MT	10393	A	G	0.00640089	0.1804 ; 0.5365	2	115	missense	MT-ND3	Fibroblast
DB6	MT	11380	A	G	0.000572321	0.0338 ; 0.0303	2	115	synonymous	MT-ND4	Fibroblast
DB6	MT	12889	G	A	0.000901786	0.0364 ; 0.0646	2	115	missense	MT-ND5	Fibroblast
DB6	MT	16327	C	T	0.00244732	0.0049 ; 0.2692	2	115	intergenic	D-loop	Fibroblast
DB6	MT	16384	G	A	0.000326786	0.0029 ; 0.0337	2	115	intergenic	D-loop	Fibroblast
DB6	MT	1750	G	A	0.000153571	0.0124 ; 0.0048	2	115	intergenic	MT-RNR2	Fibroblast
DB6	MT	3628	A	G	0.00832679	0.9326	1	115	missense	MT-ND1	Fibroblast
DB6	MT	7075	G	A	0.00362768	0.2647 ; 0.1416	2	115	missense	MT-CO1	Fibroblast
DB6	MT	9932	G	A	0.00548839	0.6147	1	115	synonymous	MT-CO3	Fibroblast
DB8	MT	16172	T	C	0.017225	0.6796 ; 0.0783	2	47	intergenic	D-loop	Fibroblast
DB8	MT	3565	A	AC	0.00720909	0.235 ; 0.0822	2	47	truncating	MT-ND1	Fibroblast
DB8	MT	5894	A	C	0.00979545	0.3364 ; 0.0946	2	47	intergenic	.	Fibroblast
DB8	MT	5894	A	G	0.0290727	0.1355 ; 0.987 ; 0.1567 ; 0.2708	4	47	intergenic	.	Fibroblast
DB9	MT	12359	C	T	0.0608552	0.9866 ; 0.7782	2	35	missense	MT-ND5	Fibroblast
DB9	MT	13434	A	G	0.0153	0.3995 ; 0.0442	2	35	synonymous	MT-ND5	Fibroblast
DB9	MT	64	C	T	0.0371345	0.0828 ; 0.9941	2	35	intergenic	D-loop	Fibroblast
DB9	MT	8251	G	A	0.0342724	0.9939	1	35	synonymous	MT-CO2	Fibroblast
DB9	MT	9531	A	G	0.0373207	0.7649 ; 0.3174	2	35	missense	MT-CO3	Fibroblast
BM	MT	10863	G	A	0.000181022	0.0135 ; 0.0113	2	137	missense	MT-ND4	HSC
BM	MT	10894	C	T	0.00499708	0.0049 ; 0.0049 ; 0.6748	3	137	synonymous	MT-ND4	HSC
BM	MT	11535	A	G	0.00162409	0.2147 ; 0.0078	2	137	missense	MT-ND4	HSC
BM	MT	11887	G	A	0.00734234	0.9808 ; 0.0251	2	137	synonymous	MT-ND4	HSC
BM	MT	12454	G	A	0.00711387	0.0085 ; 0.9568 ; 0.0093	3	137	missense	MT-ND5	HSC
BM	MT	13093	G	C	0.000612409	0.015 ; 0.0689	2	137	missense	MT-ND5	HSC
BM	MT	1338	A	G	0.00318686	0.4196 ; 0.017	2	137	intergenic	MT-RNR1	HSC
BM	MT	13726	G	A	0.000134307	0.0114 ; 0.007	2	137	missense	MT-ND5	HSC
BM	MT	14216	A	G	0.014881	0.2549 ; 0.7949 ; 0.0311 ; 0.9578	4	137	missense	MT-ND6	HSC
BM	MT	14324	T	C	0.00649416	0.0426 ; 0.0302 ; 0.8169	3	137	missense	MT-ND6	HSC
BM	MT	14790	A	G	0.00729489	0.9801 ; 0.0193	2	137	missense	MT-CYB	HSC
BM	MT	14847	G	A	9.92701e-05	0.0078 ; 0.0058	2	137	missense	MT-CYB	HSC
BM	MT	14894	T	C	0.00772263	0.037 ; 0.0287 ; 0.9923	3	137	missense	MT-CYB	HSC
BM	MT	14968	T	C	0.00758905	0.0231 ; 0.0296 ; 0.987	3	137	synonymous	MT-CYB	HSC
BM	MT	15966	A	AG	0.000257664	0.0168 ; 0.0185	2	137	intergenic	MT-TP	HSC
BM	MT	16048	G	A	0.00727372	0.0144 ; 0.9821	2	137	intergenic	D-loop	HSC
BM	MT	16081	A	G	0.00704307	0.9522 ; 0.0127	2	137	intergenic	D-loop	HSC
BM	MT	16126	T	C	0.00761168	0.0504 ; 0.9924	2	137	intergenic	D-loop	HSC
BM	MT	16130	G	A	0.00517007	0.0136 ; 0.0105 ; 0.6842	3	137	intergenic	D-loop	HSC
BM	MT	16131	T	C	0.00438759	0.463 ; 0.1381	2	137	intergenic	D-loop	HSC
BM	MT	16269	A	G	0.00707591	0.0122 ; 0.9572	2	137	intergenic	D-loop	HSC
BM	MT	16379	C	T	0.000405109	0.0083 ; 0.0472	2	137	intergenic	D-loop	HSC
BM	MT	1900	A	G	0.00404599	0.0093 ; 0.5349 ; 0.0101	3	137	intergenic	MT-RNR2	HSC
BM	MT	5585	G	A	0.00124818	0.0335 ; 0.1375	2	137	intergenic	.	HSC
BM	MT	5645	G	A	0.00194526	0.0114 ; 0.2551	2	137	intergenic	MT-TA	HSC
BM	MT	6121	T	C	0.000127737	0.0076 ; 0.0099	2	137	missense	MT-CO1	HSC
BM	MT	6150	G	A	0.00383504	0.02 ; 0.4989 ; 0.0065	3	137	missense	MT-CO1	HSC
BM	MT	6915	G	A	0.000656934	0.0042 ; 0.0858	2	137	missense	MT-CO1	HSC
BM	MT	6998	C	T	0.00412555	0.5411 ; 0.0107 ; 0.0134	3	137	synonymous	MT-CO1	HSC
BM	MT	7209	A	G	0.000654015	0.0424 ; 0.0472	2	137	missense	MT-CO1	HSC
BM	MT	7776	T	C	0.00727372	0.0122 ; 0.9719 ; 0.0124	3	137	missense	MT-CO2	HSC
BM	MT	8183	T	C	0.00330657	0.0054 ; 0.4476	2	137	missense	MT-CO2	HSC
BM	MT	8618	T	C	0.00029562	0.0198 ; 0.0207	2	137	missense	MT-ATP6	HSC
BM	MT	8618	TC	T	0.00120219	0.1553 ; 0.0094	2	137	truncating	MT-ATP6	HSC
BM	MT	9055	G	A	0.00719197	0.0116 ; 0.9737	2	137	missense	MT-ATP6	HSC
BM	MT	9443	T	C	0.00701314	0.0126 ; 0.9482	2	137	synonymous	MT-CO3	HSC
BM	MT	9468	A	G	0.00099635	0.0843 ; 0.0522	2	137	missense	MT-CO3	HSC
BM	MT	9750	T	C	0.00609124	0.8261 ; 0.0084	2	137	missense	MT-CO3	HSC
BM	MT	9799	T	C	0.0011708	0.1525 ; 0.0079	2	137	missense	MT-CO3	HSC
BM	MT	9966	G	A	0.0145693	0.0282 ; 0.9693 ; 0.0226 ; 0.9759	4	137	missense	MT-CO3	HSC
KX001	MT	12879	T	C	0.00175603	0.6168 ; 0.0821	2	398	synonymous	MT-ND5	HSC
KX001	MT	13471	G	A	0.000977387	0.2534 ; 0.0129 ; 0.1227	3	398	missense	MT-ND5	HSC
KX001	MT	13781	T	C	0.00164322	0.4142 ; 0.1651 ; 0.0747	3	398	missense	MT-ND5	HSC
KX001	MT	1544	A	G	0.00325854	0.166 ; 0.291 ; 0.8399	3	398	intergenic	MT-RNR1	HSC
KX001	MT	16325	T	C	0.00266985	0.0707 ; 0.9919	2	398	intergenic	D-loop	HSC
KX001	MT	4238	T	C	0.000747236	0.2613 ; 0.0361	2	398	missense	MT-ND1	HSC
KX001	MT	7548	G	A	0.000203518	0.0195 ; 0.0615	2	398	intergenic	MT-TD	HSC
KX004	MT	10589	G	A	0.00156806	0.0075 ; 0.3327 ; 0.3372	3	432	synonymous	MT-ND4L	HSC
KX004	MT	10860	T	C	0.000318287	0.1222 ; 0.0153	2	432	missense	MT-ND4	HSC
KX004	MT	12242	A	G	0.00066412	0.0146 ; 0.088 ; 0.1843	3	432	intergenic	MT-TS2	HSC
KX004	MT	12705	C	T	0.000206713	0.0583 ; 0.031	2	432	synonymous	MT-ND5	HSC
KX004	MT	13153	A	G	0.00103241	0.0088 ; 0.4276 ; 0.0096	3	432	missense	MT-ND5	HSC
KX004	MT	1346	A	G	0.00100949	0.0762 ; 0.3599	2	432	intergenic	MT-RNR1	HSC
KX004	MT	14035	T	C	0.0239576	0.8508 ; 0.8743 ; 0.9983 ; 0.996 ; 0.9985 ; 0.9952 ; 0.9972 ; 0.995 ; 0.9961 ; 0.9961 ; 0.5633 ; 0.063 ; 0.0259	13	432	missense	MT-ND5	HSC
KX004	MT	14587	A	G	0.000253704	0.0243 ; 0.0853	2	432	synonymous	MT-ND6	HSC
KX004	MT	14641	A	G	0.000371759	0.0574 ; 0.053 ; 0.0502	3	432	synonymous	MT-ND6	HSC
KX004	MT	14647	A	G	0.000146528	0.0363 ; 0.027	2	432	synonymous	MT-ND6	HSC
KX004	MT	14722	T	C	0.0011419	0.1719 ; 0.1786 ; 0.1428	3	432	intergenic	MT-TE	HSC
KX004	MT	15831	T	C	0.000534259	0.0568 ; 0.1253 ; 0.0487	3	432	missense	MT-CYB	HSC
KX004	MT	2792	A	G	0.000676852	0.2803 ; 0.0121	2	432	intergenic	MT-RNR2	HSC
KX004	MT	2905	A	G	0.00197361	0.016 ; 0.7724 ; 0.0642	3	432	intergenic	MT-RNR2	HSC
KX004	MT	311	CCCCCGCTT	C	9.23611e-05	0.0166 ; 0.0233	2	432	intergenic	D-loop	HSC
KX004	MT	3153	T	C	0.00119005	0.0241 ; 0.49	2	432	intergenic	MT-RNR2	HSC
KX004	MT	3343	A	G	0.00259167	0.1206 ; 0.999	2	432	missense	MT-ND1	HSC
KX004	MT	3373	A	G	0.000233333	0.0515 ; 0.0493	2	432	missense	MT-ND1	HSC
KX004	MT	3824	G	A	0.00127431	0.4814 ; 0.0691	2	432	truncating	MT-ND1	HSC
KX004	MT	4824	A	G	0.000202778	0.0105 ; 0.0771	2	432	missense	MT-ND2	HSC
KX004	MT	6366	G	A	0.00129931	0.0761 ; 0.4852	2	432	missense	MT-CO1	HSC
KX004	MT	6457	T	C	0.00970301	0.9989 ; 0.9986 ; 0.9962 ; 0.2012 ; 0.9968	5	432	missense	MT-CO1	HSC
KX004	MT	6756	T	C	0.00110764	0.3635 ; 0.115	2	432	missense	MT-CO1	HSC
KX004	MT	704	T	C	0.000871528	0.1263 ; 0.0513 ; 0.1989	3	432	intergenic	MT-RNR1	HSC
KX004	MT	8774	A	G	0.000933796	0.0182 ; 0.3852	2	432	missense	MT-ATP6	HSC
KX004	MT	9379	G	A	0.00184051	0.005 ; 0.7901	2	432	truncating	MT-CO3	HSC
KX008	MT	115	T	C	6.64835e-05	0.0115 ; 0.0127	2	364	intergenic	D-loop	HSC
KX008	MT	11935	T	C	0.000798352	0.0281 ; 0.2625	2	364	synonymous	MT-ND4	HSC
KX008	MT	13635	T	C	0.000159341	0.022 ; 0.0192 ; 0.0168	3	364	synonymous	MT-ND5	HSC
KX008	MT	14071	A	G	0.00182995	0.2951 ; 0.216 ; 0.155	3	364	missense	MT-ND5	HSC
KX008	MT	15887	T	C	0.00208901	0.4084 ; 0.0334 ; 0.3186	3	364	intergenic	MT-CYB	HSC
KX008	MT	16537	C	T	0.0109615	0.9978 ; 0.998 ; 0.9976 ; 0.9966	4	364	intergenic	D-loop	HSC
KX008	MT	1697	A	G	0.00312473	0.0767 ; 0.9995 ; 0.0612	3	364	intergenic	MT-RNR2	HSC
KX008	MT	3413	G	C	0.000571978	0.0557 ; 0.1525	2	364	missense	MT-ND1	HSC
KX008	MT	3773	T	C	0.000504945	0.169 ; 0.0148	2	364	missense	MT-ND1	HSC
KX008	MT	5849	G	A	0.000159615	0.0223 ; 0.0358	2	364	intergenic	MT_TY	HSC
KX008	MT	593	T	C	0.000938187	0.1232 ; 0.2183	2	364	intergenic	MT-TF	HSC
KX008	MT	6606	T	C	0.00247967	0.8761 ; 0.0265	2	364	missense	MT-CO1	HSC
KX008	MT	8837	T	C	0.0338027	0.9145 ; 0.9979 ; 0.9985 ; 0.9989 ; 0.3072 ; 0.9974 ; 0.9986 ; 0.9966 ; 0.9961 ; 0.9975 ; 0.9981 ; 0.9925 ; 0.1153 ; 0.9951	14	364	missense	MT-ATP6	HSC
KX008	MT	9058	A	G	0.00133132	0.0094 ; 0.4752	2	364	missense	MT-ATP6	HSC
