# Supplementary material for: Mitochondrial DNA mosaicism in human normal somatic cells
Source: Research Square preprint supplement (doi:10.21203/rs.3.rs-3602675/v1), 2023-11-21
Supplement: Supplementary file 8 [file 974995a8b8a5405802405d17.xlsx]

## Sheet: SuppleTable1_sample_profiles
Supplementary Table 2. Demographic and mutational characteristics of normal clones
The following metadata is reported for each sample: patientID = patient identifier; sampleID = sample identifier; tissue = tissue; age = age; gender = gender (M for male, F for female); mtDNA_depth = average read-depth of the mitochondrial DNA; nDNA_depth = average read-depth of the nuclear DNA; mtCN = mitochondrial copy number; varN = number of mtDNA mutations; homo N = number of mtDNA mutations…
patientID	sampleID	tissue	age	gender	mtDNA_depth	nDNA_depth	mtCN	varN	homoN	RNAseq	Bulkblood
HC01	HC01-01	Colorectal epithelium	61	M	8754.87	24.5579	712.998	2	0	NA	Available
HC01	HC01-02	Colorectal epithelium	61	M	10935.1	23.8556	916.774	6	0	Available	Available
HC01	HC01-03	Colorectal epithelium	61	M	9380.25	24.5549	764.023	6	0	Available	Available
HC01	HC01-04	Colorectal epithelium	61	M	7765.41	24.7824	626.687	1	0	Available	Available
HC01	HC01-05	Colorectal epithelium	61	M	6419.96	25.4346	504.821	5	0	Available	Available
HC01	HC01-06	Colorectal epithelium	61	M	5929.45	25.2879	468.956	4	0	Available	Available
HC01	HC01-07	Colorectal epithelium	61	M	6940.23	24.2541	572.293	3	0	Available	Available
HC01	HC01-08	Colorectal epithelium	61	M	8068.03	23.8158	677.536	3	0	Available	Available
HC01	HC01-09	Colorectal epithelium	61	M	6081.41	21.9118	555.081	5	0	Available	Available
HC01	HC01-10	Colorectal epithelium	61	M	6401.69	21.9775	582.568	6	1	Available	Available
HC01	HC01-11	Colorectal epithelium	61	M	7557.66	24.9989	604.639	11	0	Available	Available
HC01	HC01-12	Colorectal epithelium	61	M	6957.55	25.0198	556.164	1	0	Available	Available
HC01	HC01-13	Colorectal epithelium	61	M	7565.25	24.3617	621.077	1	0	Available	Available
HC01	HC01-14	Colorectal epithelium	61	M	8357.71	25.2214	662.748	6	1	Available	Available
HC01	HC01-15	Colorectal epithelium	61	M	8635.7	24.9743	691.567	5	0	Available	Available
HC01	HC01-16	Colorectal epithelium	61	M	8467.5	25.7748	657.037	2	0	Available	Available
HC01	HC01-17	Colorectal epithelium	61	M	7151.83	24.9803	572.598	5	0	Available	Available
HC01	HC01-18	Colorectal epithelium	61	M	8063.04	25.6001	629.923	5	1	Available	Available
HC01	HC01-19	Colorectal epithelium	61	M	9461.15	24.822	762.32	2	0	Available	Available
HC01	HC01-20	Colorectal epithelium	61	M	9103.18	25.2201	721.899	2	0	Available	Available
HC01	HC01-21	Colorectal epithelium	61	M	8318.58	25.9621	640.825	3	0	Available	Available
HC01	HC01-22	Colorectal epithelium	61	M	9263.77	26.1853	707.555	6	0	NA	Available
HC01	HC01-23	Colorectal epithelium	61	M	8263.49	25.5061	647.962	4	0	NA	Available
HC02	HC02-01	Colorectal epithelium	77	M	6559.36	19.1027	686.747	7	0	Available	Available
HC02	HC02-02	Colorectal epithelium	77	M	4829.38	18.8653	511.985	2	0	Available	Available
HC02	HC02-03	Colorectal epithelium	77	M	5878.69	18.8741	622.937	2	0	Available	Available
HC02	HC02-04	Colorectal epithelium	77	M	5294.8	13.5188	783.324	3	0	Available	Available
HC02	HC02-05	Colorectal epithelium	77	M	5807	18.7758	618.562	7	1	Available	Available
HC02	HC02-06	Colorectal epithelium	77	M	6398.56	15.4262	829.57	2	1	Available	Available
HC02	HC02-07	Colorectal epithelium	77	M	6510.42	12.8549	1012.91	2	0	Available	Available
HC02	HC02-08	Colorectal epithelium	77	M	4939.78	13.3551	739.759	2	0	Available	Available
HC02	HC02-09	Colorectal epithelium	77	M	4877.72	13.4341	726.17	4	1	Available	Available
HC02	HC02-10	Colorectal epithelium	77	M	4632.24	13.4457	689.029	6	0	Available	Available
HC02	HC02-11	Colorectal epithelium	77	M	2712.04	13.5831	399.326	4	0	Available	Available
HC02	HC02-12	Colorectal epithelium	77	M	3815.63	13.4631	566.828	2	0	Available	Available
HC02	HC02-13	Colorectal epithelium	77	M	3518.4	14.7327	477.631	1	0	Available	Available
HC02	HC02-14	Colorectal epithelium	77	M	4381.69	13.5286	647.767	0	0	Available	Available
HC02	HC02-15	Colorectal epithelium	77	M	6425.24	18.699	687.228	3	0	Available	Available
HC02	HC02-16	Colorectal epithelium	77	M	4899.83	13.5025	725.766	4	0	Available	Available
HC02	HC02-17	Colorectal epithelium	77	M	3872.37	14.2501	543.487	4	2	Available	Available
HC02	HC02-18	Colorectal epithelium	77	M	3466.5	15.2436	454.814	8	0	Available	Available
HC02	HC02-19	Colorectal epithelium	77	M	7283	15.3293	950.206	2	0	Available	Available
HC02	HC02-20	Colorectal epithelium	77	M	3449.34	14.0863	489.744	4	1	Available	Available
HC02	HC02-21	Colorectal epithelium	77	M	4413.9	14.423	612.064	2	0	Available	Available
HC02	HC02-22	Colorectal epithelium	77	M	2851.73	14.6877	388.315	1	0	Available	Available
HC03	HC03-01	Colorectal epithelium	88	M	11515.1	26.0044	885.627	0	0	NA	Available
HC03	HC03-02	Colorectal epithelium	88	M	10073.7	24.8431	810.986	5	0	NA	Available
HC03	HC03-03	Colorectal epithelium	88	M	10360.5	24.4471	847.585	4	0	NA	Available
HC03	HC03-04	Colorectal epithelium	88	M	11050	24.2665	910.721	6	0	NA	Available
HC03	HC03-05	Colorectal epithelium	88	M	11868.2	25.5086	930.525	7	0	NA	Available
HC03	HC03-06	Colorectal epithelium	88	M	10812.6	25.8114	837.816	7	1	NA	Available
HC03	HC03-07	Colorectal epithelium	88	M	11854.2	25.4217	932.605	6	0	NA	Available
HC03	HC03-08	Colorectal epithelium	88	M	11749	25.4568	923.054	7	0	NA	Available
HC03	HC03-09	Colorectal epithelium	88	M	11151.3	25.509	874.303	3	0	NA	Available
HC03	HC03-10	Colorectal epithelium	88	M	11459	25.1125	912.613	4	0	NA	Available
HC03	HC03-11	Colorectal epithelium	88	M	10615.1	24.7527	857.692	6	0	NA	Available
HC03	HC03-12	Colorectal epithelium	88	M	11200.5	24.6614	908.343	5	0	NA	Available
HC03	HC03-13	Colorectal epithelium	88	M	12416.7	26.8584	924.605	3	0	NA	Available
HC03	HC03-14	Colorectal epithelium	88	M	10312.5	25.5197	808.199	6	0	NA	Available
HC03	HC03-15	Colorectal epithelium	88	M	10721.4	25.4625	842.133	4	0	NA	Available
HC03	HC03-16	Colorectal epithelium	88	M	10405.3	25.4335	818.236	6	0	NA	Available
HC03	HC03-17	Colorectal epithelium	88	M	11126.1	25.1101	886.185	2	0	NA	Available
HC03	HC03-18	Colorectal epithelium	88	M	10635.3	25.2093	843.76	0	0	NA	Available
HC03	HC03-19	Colorectal epithelium	88	M	13263.4	24.8131	1069.06	1	0	NA	Available
HC03	HC03-20	Colorectal epithelium	88	M	11848.5	24.5092	966.861	4	0	NA	Available
HC03	HC03-21	Colorectal epithelium	88	M	10214.6	25.0973	814	9	0	NA	Available
HC03	HC03-22	Colorectal epithelium	88	M	10134.7	25.665	789.768	4	1	NA	Available
HC03	HC03-23	Colorectal epithelium	88	M	11886.1	26.4456	898.909	3	0	NA	Available
HC03	HC03-24	Colorectal epithelium	88	M	9598.2	25.0829	765.318	4	0	NA	Available
HC04	HC04-01	Colorectal epithelium	70	M	5783.22	17.4829	661.586	3	0	NA	Available
HC04	HC04-02	Colorectal epithelium	70	M	4439.97	15.2775	581.243	6	0	NA	Available
HC04	HC04-03	Colorectal epithelium	70	M	4399.85	18.8972	465.662	0	0	NA	Available
HC04	HC04-04	Colorectal epithelium	70	M	3964.35	16.1264	491.66	6	0	NA	Available
HC04	HC04-05	Colorectal epithelium	70	M	4975.21	14.1446	703.478	4	0	NA	Available
HC04	HC04-06	Colorectal epithelium	70	M	4501.56	15.0612	597.769	2	0	NA	Available
HC04	HC04-07	Colorectal epithelium	70	M	5477.16	16.6394	658.336	4	0	NA	Available
HC04	HC04-08	Colorectal epithelium	70	M	3722.17	13.3209	558.847	3	0	NA	Available
HC04	HC04-09	Colorectal epithelium	70	M	5260.69	16.4731	638.701	6	0	NA	Available
HC04	HC04-10	Colorectal epithelium	70	M	3538.78	13.8421	511.307	8	0	NA	Available
HC04	HC04-11	Colorectal epithelium	70	M	5078.72	16.7625	605.962	5	1	NA	Available
HC04	HC04-12	Colorectal epithelium	70	M	4254.03	14.5963	582.892	6	2	NA	Available
HC04	HC04-13	Colorectal epithelium	70	M	4589.55	14.399	637.482	2	0	NA	Available
HC04	HC04-14	Colorectal epithelium	70	M	4164.97	15.1039	551.509	5	0	NA	Available
HC04	HC04-15	Colorectal epithelium	70	M	4049.52	13.5969	595.653	10	0	NA	Available
HC04	HC04-16	Colorectal epithelium	70	M	4185.86	13.6882	611.601	3	0	NA	Available
HC04	HC04-17	Colorectal epithelium	70	M	4609.8	13.8024	667.971	4	1	NA	Available
HC04	HC04-18	Colorectal epithelium	70	M	4252.23	15.0124	566.496	5	0	NA	Available
HC04	HC04-19	Colorectal epithelium	70	M	4466.96	16.5848	538.681	6	0	NA	Available
HC04	HC04-20	Colorectal epithelium	70	M	6856.19	15.0418	911.618	0	0	NA	Available
HC04	HC04-21	Colorectal epithelium	70	M	3952.24	14.209	556.301	1	0	NA	Available
HC04	HC04-22	Colorectal epithelium	70	M	4549.24	14.4207	630.932	8	0	NA	Available
HC04	HC04-23	Colorectal epithelium	70	M	4165.09	13.3544	623.778	2	0	NA	Available
HC05	HC05-01	Colorectal epithelium	62	F	14455.4	26.0249	1110.89	6	0	NA	Available
HC05	HC05-02	Colorectal epithelium	62	F	11762.9	25.6714	916.421	12	0	NA	Available
HC05	HC05-03	Colorectal epithelium	62	F	11053.8	25.5993	863.602	3	0	NA	Available
HC05	HC05-04	Colorectal epithelium	62	F	13530.5	26.0269	1039.73	2	0	NA	Available
HC05	HC05-05	Colorectal epithelium	62	F	11721.3	25.9655	902.836	2	0	NA	Available
HC05	HC05-06	Colorectal epithelium	62	F	11124.6	24.8738	894.483	3	0	NA	Available
HC05	HC05-07	Colorectal epithelium	62	F	12794.1	26.3377	971.543	3	0	NA	Available
HC05	HC05-08	Colorectal epithelium	62	F	11845.9	26.1995	904.284	3	0	NA	Available
HC05	HC05-09	Colorectal epithelium	62	F	12643.7	26.1698	966.282	5	1	NA	Available
HC05	HC05-10	Colorectal epithelium	62	F	7879.44	18.7873	838.805	2	0	NA	Available
HC05	HC05-11	Colorectal epithelium	62	F	6621.58	12.8628	1029.57	2	0	NA	Available
HC05	HC05-12	Colorectal epithelium	62	F	8617.13	16.438	1048.44	5	2	NA	Available
HC05	HC05-13	Colorectal epithelium	62	F	7585.41	13.2284	1146.84	2	0	NA	Available
HC05	HC05-14	Colorectal epithelium	62	F	6744.22	13.8254	975.627	2	0	NA	Available
HC05	HC05-15	Colorectal epithelium	62	F	6935.45	13.3196	1041.39	2	0	NA	Available
HC05	HC05-16	Colorectal epithelium	62	F	5399.07	13.5963	794.197	7	0	NA	Available
HC05	HC05-17	Colorectal epithelium	62	F	6926.24	13.2295	1047.09	2	0	NA	Available
HC05	HC05-18	Colorectal epithelium	62	F	7799.52	17.1551	909.295	6	0	NA	Available
HC05	HC05-19	Colorectal epithelium	62	F	6161.79	13.652	902.694	1	0	NA	Available
HC05	HC05-20	Colorectal epithelium	62	F	7169.56	16.6283	862.332	8	0	NA	Available
HC05	HC05-21	Colorectal epithelium	62	F	7927.03	15.1548	1046.14	6	0	NA	Available
HC05	HC05-22	Colorectal epithelium	62	F	6489.21	13.6495	950.835	5	0	NA	Available
HC05	HC05-23	Colorectal epithelium	62	F	6965.47	13.3585	1042.85	2	0	NA	Available
HC05	HC05-24	Colorectal epithelium	62	F	7516.41	16.6663	901.989	4	0	NA	Available
HC06	HC06-01	Colorectal epithelium	54	M	4216.23	13.7546	613.065	4	0	NA	Available
HC06	HC06-02	Colorectal epithelium	54	M	3687.29	15.1391	487.121	2	0	NA	Available
HC06	HC06-03	Colorectal epithelium	54	M	3704.59	13.8931	533.299	9	0	NA	Available
HC06	HC06-04	Colorectal epithelium	54	M	3648.66	14.5812	500.461	3	0	NA	Available
HC06	HC06-05	Colorectal epithelium	54	M	5375.07	16.4114	655.041	6	0	NA	Available
HC06	HC06-06	Colorectal epithelium	54	M	4172.46	16.4899	506.062	4	0	NA	Available
HC06	HC06-07	Colorectal epithelium	54	M	4423.26	14.8502	595.717	0	0	NA	Available
HC06	HC06-08	Colorectal epithelium	54	M	4023.25	13.5806	592.5	4	0	NA	Available
HC06	HC06-09	Colorectal epithelium	54	M	4608.68	14.2681	646.012	7	0	NA	Available
HC06	HC06-10	Colorectal epithelium	54	M	3966.05	14.5544	544.997	4	0	Available	Available
HC06	HC06-11	Colorectal epithelium	54	M	5018.12	15.8842	631.838	3	0	Available	Available
HC06	HC06-12	Colorectal epithelium	54	M	4820.28	15.2689	631.385	1	0	Available	Available
HC06	HC06-13	Colorectal epithelium	54	M	4267.87	16.0372	532.246	5	0	Available	Available
HC06	HC06-14	Colorectal epithelium	54	M	5264.19	15.117	696.46	4	1	NA	Available
HC06	HC06-15	Colorectal epithelium	54	M	4771.17	16.9185	564.018	5	0	NA	Available
HC06	HC06-16	Colorectal epithelium	54	M	4434.44	13.923	636.995	3	1	Available	Available
HC06	HC06-17	Colorectal epithelium	54	M	4174.16	13.8765	601.616	3	0	Available	Available
HC06	HC06-18	Colorectal epithelium	54	M	4925.8	18.3551	536.723	8	0	Available	Available
HC06	HC06-19	Colorectal epithelium	54	M	3877.88	14.6061	530.995	3	0	Available	Available
HC06	HC06-20	Colorectal epithelium	54	M	4648.95	13.2459	701.946	2	0	Available	Available
HC06	HC06-21	Colorectal epithelium	54	M	3831.83	13.4339	570.472	3	0	Available	Available
HC06	HC06-22	Colorectal epithelium	54	M	5205.02	13.1373	792.403	4	1	Available	Available
HC08	HC08-01	Colorectal epithelium	53	F	5851.93	13.4563	869.768	7	0	Available	Available
HC08	HC08-02	Colorectal epithelium	53	F	3517.57	13.2561	530.71	8	0	NA	Available
HC08	HC08-03	Colorectal epithelium	53	F	5644	14.3029	789.211	10	1	Available	Available
HC08	HC08-04	Colorectal epithelium	53	F	7810.11	19.2896	809.774	3	0	Available	Available
HC08	HC08-05	Colorectal epithelium	53	F	5672.53	13.87	817.957	3	0	Available	Available
HC08	HC08-06	Colorectal epithelium	53	F	5325.01	16.5395	643.914	4	0	Available	Available
HC08	HC08-07	Colorectal epithelium	53	F	7986.05	18.1208	881.424	4	0	Available	Available
HC08	HC08-08	Colorectal epithelium	53	F	5232.42	14.6342	715.095	4	0	Available	Available
HC08	HC08-09	Colorectal epithelium	53	F	5121.65	15.6546	654.332	4	0	Available	Available
HC08	HC08-10	Colorectal epithelium	53	F	5280.78	15.9662	661.495	3	0	Available	Available
HC08	HC08-11	Colorectal epithelium	53	F	8201.27	19.095	858.997	1	0	Available	Available
HC08	HC08-12	Colorectal epithelium	53	F	5107.35	19.1151	534.379	5	0	Available	Available
HC08	HC08-13	Colorectal epithelium	53	F	7894.45	17.6733	893.376	10	0	Available	Available
HC08	HC08-14	Colorectal epithelium	53	F	4221.09	15.0896	559.47	4	0	Available	Available
HC08	HC08-15	Colorectal epithelium	53	F	6918.64	15.9942	865.144	6	0	Available	Available
HC08	HC08-16	Colorectal epithelium	53	F	6307.71	16.8801	747.355	4	0	Available	Available
HC08	HC08-17	Colorectal epithelium	53	F	6803.35	17.0959	795.904	2	0	Available	Available
HC08	HC08-18	Colorectal epithelium	53	F	5201.31	14.8014	702.813	7	1	Available	Available
HC08	HC08-19	Colorectal epithelium	53	F	5018.66	14.8444	676.169	4	0	Available	Available
HC08	HC08-20	Colorectal epithelium	53	F	6974.09	16.9263	824.054	8	0	Available	Available
HC08	HC08-21	Colorectal epithelium	53	F	7331.62	18.7721	781.119	9	0	Available	Available
HC08	HC08-22	Colorectal epithelium	53	F	9704.48	19.1181	1015.21	6	0	Available	Available
HC08	HC08-23	Colorectal epithelium	53	F	6592.59	18.9035	697.499	7	1	Available	Available
HC09	HC09-01	Colorectal epithelium	65	M	4034.38	14.84	543.717	4	1	Available	Available
HC09	HC09-02	Colorectal epithelium	65	M	4388.5	15.0016	585.071	6	0	Available	Available
HC09	HC09-03	Colorectal epithelium	65	M	3660.46	14.8124	494.243	10	1	Available	Available
HC09	HC09-04	Colorectal epithelium	65	M	3361.23	15.3051	439.23	3	0	Available	Available
HC09	HC09-05	Colorectal epithelium	65	M	3650.62	14.8094	493.014	5	0	Available	Available
HC09	HC09-06	Colorectal epithelium	65	M	4332.01	14.9552	579.332	0	0	Available	Available
HC09	HC09-07	Colorectal epithelium	65	M	4384.84	13.833	633.968	2	0	Available	Available
HC09	HC09-08	Colorectal epithelium	65	M	4420.65	13.9664	633.041	3	0	Available	Available
HC09	HC09-09	Colorectal epithelium	65	M	3422.09	13.9582	490.334	0	0	Available	Available
HC09	HC09-10	Colorectal epithelium	65	M	3527.25	13.7176	514.266	4	0	Available	Available
HC09	HC09-11	Colorectal epithelium	65	M	3880.94	15.6226	496.837	6	0	Available	Available
HC09	HC09-12	Colorectal epithelium	65	M	4296.68	14.6622	586.089	6	0	Available	Available
HC09	HC09-13	Colorectal epithelium	65	M	5456.53	15.0513	725.058	0	0	Available	Available
HC09	HC09-14	Colorectal epithelium	65	M	3781.81	14.5836	518.639	3	1	Available	Available
HC09	HC09-15	Colorectal epithelium	65	M	5064.58	14.7392	687.226	2	0	Available	Available
HC09	HC09-16	Colorectal epithelium	65	M	3564.42	14.3277	497.556	5	0	Available	Available
HC09	HC09-17	Colorectal epithelium	65	M	4001.93	14.4387	554.334	4	0	Available	Available
HC09	HC09-18	Colorectal epithelium	65	M	2993.8	14.1584	422.901	2	0	Available	Available
HC09	HC09-19	Colorectal epithelium	65	M	3038.9	14.03	433.2	3	0	Available	Available
HC09	HC09-20	Colorectal epithelium	65	M	4199.32	16.3921	512.359	3	0	Available	Available
HC09	HC09-21	Colorectal epithelium	65	M	2773.17	13.7726	402.708	5	0	Available	Available
HC10	HC10-01	Colorectal epithelium	37	M	4672.94	13.9585	669.548	7	0	Available	Available
HC10	HC10-02	Colorectal epithelium	37	M	4923.74	13.4916	729.897	3	0	Available	Available
HC10	HC10-03	Colorectal epithelium	37	M	5348.04	13.4072	797.786	7	0	Available	Available
HC10	HC10-04	Colorectal epithelium	37	M	4403.71	13.3235	661.044	5	0	Available	Available
HC10	HC10-05	Colorectal epithelium	37	M	3841.04	11.4192	672.734	6	0	Available	Available
HC10	HC10-06	Colorectal epithelium	37	M	5250.33	12.9661	809.855	4	0	Available	Available
HC10	HC10-07	Colorectal epithelium	37	M	4307.93	12.4453	692.298	3	0	Available	Available
HC10	HC10-08	Colorectal epithelium	37	M	4635.96	13.7278	675.412	4	0	Available	Available
HC10	HC10-09	Colorectal epithelium	37	M	6203.96	15.0923	822.136	5	0	Available	Available
HC10	HC10-10	Colorectal epithelium	37	M	4557.21	13.9589	652.947	6	0	Available	Available
HC10	HC10-11	Colorectal epithelium	37	M	5166.46	18.8088	549.366	3	0	Available	Available
HC10	HC10-12	Colorectal epithelium	37	M	5983.08	16.908	707.722	3	0	Available	Available
HC10	HC10-13	Colorectal epithelium	37	M	4423.01	12.1045	730.804	2	0	Available	Available
HC10	HC10-14	Colorectal epithelium	37	M	4569.37	12.9822	703.944	6	0	Available	Available
HC10	HC10-15	Colorectal epithelium	37	M	4616.42	12.3996	744.608	5	0	Available	Available
HC10	HC10-16	Colorectal epithelium	37	M	4869.15	13.163	739.824	2	0	Available	Available
HC10	HC10-17	Colorectal epithelium	37	M	5262.57	13.5397	777.354	6	0	Available	Available
HC10	HC10-18	Colorectal epithelium	37	M	4832.22	12.8852	750.042	4	0	Available	Available
HC10	HC10-19	Colorectal epithelium	37	M	8059.59	18.7868	858.006	2	0	Available	Available
HC10	HC10-20	Colorectal epithelium	37	M	4782.86	13.7432	696.033	4	0	Available	Available
HC12	HC12-03	Colorectal epithelium	84	F	4560.18	13.5145	674.857	4	0	Available	Available
HC12	HC12-04	Colorectal epithelium	84	F	5650.93	14.998	753.558	4	1	Available	Available
HC12	HC12-05	Colorectal epithelium	84	F	4812.2	13.805	697.168	4	0	Available	Available
HC12	HC12-06	Colorectal epithelium	84	F	4528.13	15.1812	596.544	1	0	NA	Available
HC12	HC12-07	Colorectal epithelium	84	F	7389.35	14.734	1003.03	7	0	Available	Available
HC12	HC12-08	Colorectal epithelium	84	F	4298.65	14.0552	611.681	3	0	Available	Available
HC12	HC12-09	Colorectal epithelium	84	F	5477.75	14.3996	760.82	3	1	Available	Available
HC12	HC12-10	Colorectal epithelium	84	F	6744.09	14.8921	905.727	5	0	Available	Available
HC12	HC12-11	Colorectal epithelium	84	F	4410.23	14.976	588.973	4	1	Available	Available
HC12	HC12-12	Colorectal epithelium	84	F	5423.79	15.0117	722.608	7	0	Available	Available
HC12	HC12-13	Colorectal epithelium	84	F	6666.88	14.4015	925.859	2	0	NA	Available
HC12	HC12-14	Colorectal epithelium	84	F	8173.58	14.161	1154.38	4	1	Available	Available
HC12	HC12-15	Colorectal epithelium	84	F	5383.42	14.9237	721.459	6	0	Available	Available
HC12	HC12-16	Colorectal epithelium	84	F	6239.08	13.7848	905.212	5	0	Available	Available
HC12	HC12-17	Colorectal epithelium	84	F	5789.93	15.6785	738.582	5	1	Available	Available
HC12	HC12-18	Colorectal epithelium	84	F	3370.14	15.0744	447.134	4	0	Available	Available
HC12	HC12-19	Colorectal epithelium	84	F	3426.07	13.8644	494.225	5	0	Available	Available
HC12	HC12-20	Colorectal epithelium	84	F	4767.99	14.9795	636.602	6	0	Available	Available
HC12	HC12-21	Colorectal epithelium	84	F	5265.4	14.5915	721.708	2	0	Available	Available
HC12	HC12-22	Colorectal epithelium	84	F	7730.07	15.151	1020.4	1	0	Available	Available
HC12	HC12-23	Colorectal epithelium	84	F	7828.23	14.894	1051.19	2	0	Available	Available
HC12	HC12-24	Colorectal epithelium	84	F	1997.5	15.0526	265.403	7	0	Available	Available
HC13	HC13-01	Colorectal epithelium	71	M	5746.29	14.185	810.192	7	0	Available	Available
HC13	HC13-02	Colorectal epithelium	71	M	6854.81	13.8824	987.554	2	0	Available	Available
HC13	HC13-03	Colorectal epithelium	71	M	7323.7	14.0897	1039.58	3	0	Available	Available
HC13	HC13-04	Colorectal epithelium	71	M	5751.51	14.6847	783.334	5	0	Available	Available
HC13	HC13-05	Colorectal epithelium	71	M	6053.78	15.3687	787.806	3	1	Available	Available
HC13	HC13-06	Colorectal epithelium	71	M	5786.33	15.1174	765.519	6	0	Available	Available
HC13	HC13-07	Colorectal epithelium	71	M	5220.39	14.5691	716.639	6	2	Available	Available
HC13	HC13-08	Colorectal epithelium	71	M	5234.34	14.6758	713.329	5	0	Available	Available
HC13	HC13-09	Colorectal epithelium	71	M	7017.32	14.6562	957.591	9	0	Available	Available
HC13	HC13-10	Colorectal epithelium	71	M	5857.48	14.6771	798.179	6	0	Available	Available
HC13	HC13-11	Colorectal epithelium	71	M	6023.23	14.776	815.272	1	0	Available	Available
HC13	HC13-12	Colorectal epithelium	71	M	6749.29	14.1548	953.64	6	0	Available	Available
HC13	HC13-13	Colorectal epithelium	71	M	7048.63	13.9664	1009.37	10	0	Available	Available
HC13	HC13-14	Colorectal epithelium	71	M	6204.99	14.2491	870.931	2	0	Available	Available
HC13	HC13-15	Colorectal epithelium	71	M	6150.66	14.2242	864.816	3	0	Available	Available
HC13	HC13-16	Colorectal epithelium	71	M	7326.8	15.446	948.699	6	0	Available	Available
HC13	HC13-17	Colorectal epithelium	71	M	6380.82	14.8481	859.48	5	0	Available	Available
HC13	HC13-18	Colorectal epithelium	71	M	6143.39	14.4718	849.015	1	0	Available	Available
HC13	HC13-19	Colorectal epithelium	71	M	6352.52	14.2007	894.677	3	0	Available	Available
HC13	HC13-20	Colorectal epithelium	71	M	6054.44	13.6741	885.534	2	0	Available	Available
HC13	HC13-21	Colorectal epithelium	71	M	6117.82	14.1653	863.776	5	0	Available	Available
HC13	HC13-22	Colorectal epithelium	71	M	5393.84	14.7237	732.675	2	0	Available	Available
HC14	HC14-01	Colorectal epithelium	46	F	8547.12	14.4048	1186.7	5	0	Available	Available
HC14	HC14-02	Colorectal epithelium	46	F	6100.16	14.4978	841.529	6	0	NA	Available
HC14	HC14-03	Colorectal epithelium	46	F	7246.48	15.3455	944.444	4	0	Available	Available
HC14	HC14-04	Colorectal epithelium	46	F	8148.21	15.5758	1046.27	8	0	Available	Available
HC14	HC14-05	Colorectal epithelium	46	F	4993.33	15.417	647.769	1	0	Available	Available
HC14	HC14-06	Colorectal epithelium	46	F	4820.45	15.12	637.626	7	0	NA	Available
HC14	HC14-07	Colorectal epithelium	46	F	6517.56	16.1515	807.053	6	0	NA	Available
HC14	HC14-08	Colorectal epithelium	46	F	6043.82	14.6926	822.703	2	0	NA	Available
HC14	HC14-09	Colorectal epithelium	46	F	5846.27	13.6619	855.85	4	0	NA	Available
HC14	HC14-10	Colorectal epithelium	46	F	3437.28	13.5053	509.027	2	0	NA	Available
HC14	HC14-11	Colorectal epithelium	46	F	5669.58	15.1527	748.326	4	0	Available	Available
HC14	HC14-12	Colorectal epithelium	46	F	5317.45	14.5772	729.557	0	0	Available	Available
HC14	HC14-13	Colorectal epithelium	46	F	5784.38	14.5566	794.743	3	0	Available	Available
HC14	HC14-14	Colorectal epithelium	46	F	7352.54	15.4441	952.149	4	0	Available	Available
HC14	HC14-15	Colorectal epithelium	46	F	6020.53	14.2454	845.26	4	0	NA	Available
HC14	HC14-16	Colorectal epithelium	46	F	7357.14	14.4458	1018.59	8	1	Available	Available
HC14	HC14-17	Colorectal epithelium	46	F	6552.52	14.1566	925.719	7	0	Available	Available
HC14	HC14-18	Colorectal epithelium	46	F	7101.87	13.3954	1060.34	3	0	NA	Available
HC14	HC14-19	Colorectal epithelium	46	F	7888.33	14.9809	1053.12	4	0	NA	Available
HC15	HC15-01	Colorectal epithelium	56	F	5641.47	15.1576	744.375	3	0	Available	Available
HC15	HC15-02	Colorectal epithelium	56	F	6021.26	15.0759	798.793	4	0	Available	Available
HC15	HC15-03	Colorectal epithelium	56	F	5829.19	13.9673	834.691	2	1	Available	Available
HC15	HC15-04	Colorectal epithelium	56	F	4919.13	15.4616	636.303	4	0	Available	Available
HC15	HC15-05	Colorectal epithelium	56	F	4131.29	14.4582	571.481	5	0	Available	Available
HC15	HC15-06	Colorectal epithelium	56	F	5899.14	16.3842	720.101	5	1	Available	Available
HC15	HC15-07	Colorectal epithelium	56	F	5163.52	13.9601	739.754	4	0	Available	Available
HC15	HC15-08	Colorectal epithelium	56	F	5356.37	14.7836	724.637	5	0	Available	Available
HC15	HC15-09	Colorectal epithelium	56	F	5417.22	14.2304	761.359	6	0	Available	Available
HC15	HC15-10	Colorectal epithelium	56	F	5905	14.9826	788.248	2	0	Available	Available
HC15	HC15-11	Colorectal epithelium	56	F	5337.64	14.7295	724.755	7	0	Available	Available
HC15	HC15-12	Colorectal epithelium	56	F	7076.45	15.7231	900.134	1	0	Available	Available
HC15	HC15-13	Colorectal epithelium	56	F	5269.89	14.4451	729.644	4	0	Available	Available
HC15	HC15-14	Colorectal epithelium	56	F	5805.86	15.1279	767.57	7	0	Available	Available
HC15	HC15-15	Colorectal epithelium	56	F	5246.05	14.4164	727.789	12	1	Available	Available
HC15	HC15-16	Colorectal epithelium	56	F	6480.18	15.849	817.74	2	1	Available	Available
HC15	HC15-17	Colorectal epithelium	56	F	5781.49	14.8202	780.218	5	0	Available	Available
HC15	HC15-18	Colorectal epithelium	56	F	5108.39	15.0312	679.705	5	0	Available	Available
HC15	HC15-19	Colorectal epithelium	56	F	5634.94	15.7806	714.16	6	0	Available	Available
HC15	HC15-20	Colorectal epithelium	56	F	7050.55	16.2037	870.24	5	0	Available	Available
HC15	HC15-21	Colorectal epithelium	56	F	7653.88	16.439	931.186	4	1	Available	Available
HC15	HC15-22	Colorectal epithelium	56	F	5404.31	15.5467	695.236	3	0	Available	Available
HC15	HC15-23	Colorectal epithelium	56	F	5328.27	15.0252	709.244	2	0	Available	Available
HC16	HC16-01	Colorectal epithelium	63	F	14538.8	22.6272	1285.07	2	0	Available	Available
HC16	HC16-02	Colorectal epithelium	63	F	4177.72	14.5265	575.186	7	0	Available	Available
HC16	HC16-03	Colorectal epithelium	63	F	3283.04	12.0436	545.192	5	0	Available	Available
HC16	HC16-04	Colorectal epithelium	63	F	6592.43	18.8145	700.782	7	0	Available	Available
HC16	HC16-05	Colorectal epithelium	63	F	3925.42	13.4459	583.884	7	1	Available	Available
HC16	HC16-06	Colorectal epithelium	63	F	4816.35	16.692	577.085	3	0	Available	Available
HC16	HC16-07	Colorectal epithelium	63	F	3279.53	12.9091	508.096	4	0	Available	Available
HC16	HC16-08	Colorectal epithelium	63	F	2860.09	13.3839	427.393	5	0	Available	Available
HC16	HC16-09	Colorectal epithelium	63	F	2951.47	15.0051	393.396	5	0	Available	Available
HC16	HC16-11	Colorectal epithelium	63	F	5960.19	15.0927	789.811	4	0	Available	Available
HC16	HC16-12	Colorectal epithelium	63	F	6206.4	18.5416	669.457	5	0	Available	Available
HC16	HC16-13	Colorectal epithelium	63	F	6582.75	13.6939	961.413	6	0	Available	Available
HC16	HC16-14	Colorectal epithelium	63	F	4205.08	15.363	547.43	1	0	Available	Available
HC16	HC16-15	Colorectal epithelium	63	F	6090.2	17.8166	683.655	5	0	Available	Available
HC16	HC16-16	Colorectal epithelium	63	F	6551.8	17.1594	763.64	4	1	Available	Available
HC16	HC16-17	Colorectal epithelium	63	F	5035.87	16.3658	615.414	0	0	Available	Available
HC16	HC16-18	Colorectal epithelium	63	F	5069.63	16.9116	599.545	1	0	Available	Available
HC16	HC16-19	Colorectal epithelium	63	F	3353.23	16.6923	401.77	1	0	Available	Available
HC17	HC17-01	Colorectal epithelium	64	F	5569.11	13.5352	822.908	4	0	Available	Available
HC17	HC17-02	Colorectal epithelium	64	F	11491.1	16.6916	1376.87	11	0	Available	Available
HC17	HC17-03	Colorectal epithelium	64	F	6380.2	14.4887	880.714	2	0	Available	Available
HC17	HC17-04	Colorectal epithelium	64	F	6826.35	16.4686	829.014	4	1	Available	Available
HC17	HC17-05	Colorectal epithelium	64	F	9433.46	20.7871	907.626	4	0	Available	Available
HC17	HC17-07	Colorectal epithelium	64	F	9090.14	19.2722	943.342	6	0	Available	Available
HC17	HC17-08	Colorectal epithelium	64	F	12833.9	14.4132	1780.85	2	1	Available	Available
HC17	HC17-12	Colorectal epithelium	64	F	13598.6	13.6345	1994.73	1	0	Available	Available
HC17	HC17-13	Colorectal epithelium	64	F	5474.28	13.404	816.813	4	0	Available	Available
HC17	HC17-15	Colorectal epithelium	64	F	8072.81	17.3296	931.679	1	0	Available	Available
HC17	HC17-16	Colorectal epithelium	64	F	6696.13	13.5449	988.731	4	0	Available	Available
HC17	HC17-17	Colorectal epithelium	64	F	13901	15.3623	1809.76	8	0	Available	Available
HC17	HC17-18	Colorectal epithelium	64	F	13892.7	12.9704	2142.22	4	0	Available	Available
HC17	HC17-19	Colorectal epithelium	64	F	6395.19	13.99	914.252	2	1	Available	Available
HC18	HC18-01	Colorectal epithelium	66	F	10647.8	16.4823	1292.03	1	0	Available	Available
HC18	HC18-03	Colorectal epithelium	66	F	6077.96	13.1274	925.996	2	1	Available	Available
HC18	HC18-05	Colorectal epithelium	66	F	13604.5	15.0513	1807.75	5	0	Available	Available
HC18	HC18-07	Colorectal epithelium	66	F	8088.24	17.0088	951.065	4	1	Available	Available
HC18	HC18-08	Colorectal epithelium	66	F	8569.54	14.2175	1205.49	7	1	NA	Available
HC18	HC18-09	Colorectal epithelium	66	F	5988.56	13.0712	916.298	6	0	Available	Available
HC18	HC18-10	Colorectal epithelium	66	F	8230.28	13.8931	1184.8	4	0	Available	Available
HC18	HC18-11	Colorectal epithelium	66	F	9469.41	19.8407	954.544	3	0	Available	Available
HC18	HC18-12	Colorectal epithelium	66	F	7297.6	18.2688	798.914	3	0	Available	Available
HC18	HC18-13	Colorectal epithelium	66	F	6797.52	16.2565	836.283	5	0	Available	Available
HC18	HC18-14	Colorectal epithelium	66	F	9839.49	13.5634	1450.89	3	0	Available	Available
HC18	HC18-15	Colorectal epithelium	66	F	11647.1	20.0588	1161.3	1	0	Available	Available
HC18	HC18-16	Colorectal epithelium	66	F	10115.1	16.2649	1243.79	5	0	Available	Available
HC18	HC18-17	Colorectal epithelium	66	F	10414.3	12.9562	1607.62	6	0	Available	Available
HC18	HC18-18	Colorectal epithelium	66	F	9740.03	19.3894	1004.68	5	0	Available	Available
HC18	HC18-19	Colorectal epithelium	66	F	6251.84	12.9538	965.252	4	0	Available	Available
HC18	HC18-20	Colorectal epithelium	66	F	5489.01	13.2864	826.26	3	0	Available	Available
HC19	HC19-01	Colorectal epithelium	73	M	3681.64	15.0549	489.095	2	0	Available	Available
HC19	HC19-02	Colorectal epithelium	73	M	3490.46	17.9435	389.05	7	0	Available	Available
HC19	HC19-03	Colorectal epithelium	73	M	4051.82	13.1297	617.199	1	1	Available	Available
HC19	HC19-04	Colorectal epithelium	73	M	10492.1	23.1967	904.62	2	0	Available	Available
HC19	HC19-05	Colorectal epithelium	73	M	6288.74	13.3565	941.675	7	1	Available	Available
HC19	HC19-06	Colorectal epithelium	73	M	8845.56	16.4562	1075.04	6	1	Available	Available
HC19	HC19-07	Colorectal epithelium	73	M	4903.04	15.4809	633.431	5	0	Available	Available
HC19	HC19-08	Colorectal epithelium	73	M	5433.33	15.9115	682.944	9	1	Available	Available
HC19	HC19-09	Colorectal epithelium	73	M	5645.35	13.6837	825.12	3	0	Available	Available
HC19	HC19-10	Colorectal epithelium	73	M	7100.49	25.1985	563.564	5	1	Available	Available
HC19	HC19-11	Colorectal epithelium	73	M	5466.55	13.8211	791.044	6	0	Available	Available
HC19	HC19-12	Colorectal epithelium	73	M	8186.09	15.9234	1028.18	2	1	NA	Available
HC19	HC19-13	Colorectal epithelium	73	M	6215.79	15.9343	780.177	2	0	Available	Available
HC19	HC19-14	Colorectal epithelium	73	M	7910.57	18.7897	842.011	8	0	Available	Available
HC19	HC19-15	Colorectal epithelium	73	M	3763.32	15.9965	470.518	4	0	Available	Available
HC19	HC19-16	Colorectal epithelium	73	M	4408.43	21.3434	413.095	6	0	Available	Available
HC19	HC19-17	Colorectal epithelium	73	M	4883	14.5579	670.839	2	0	Available	Available
HC19	HC19-18	Colorectal epithelium	73	M	12610	17.1137	1473.67	5	1	Available	Available
HC19	HC19-19	Colorectal epithelium	73	M	3255.04	12.8764	505.582	1	1	Available	Available
HC19	HC19-20	Colorectal epithelium	73	M	3258.75	14.8956	437.545	4	0	Available	Available
HC19	HC19-21	Colorectal epithelium	73	M	4785.18	13.1129	729.843	7	1	NA	Available
HC19	HC19-22	Colorectal epithelium	73	M	6314.23	16.0173	788.426	5	0	NA	Available
HC19	HC19-23	Colorectal epithelium	73	M	5975.73	14.0173	852.622	2	1	NA	Available
HC20	HC20-01	Colorectal epithelium	45	F	10244.8	23.3456	877.664	10	0	Available	Available
HC20	HC20-02	Colorectal epithelium	45	F	6245.3	15.3886	811.679	6	2	Available	Available
HC20	HC20-03	Colorectal epithelium	45	F	7156.13	15.2187	940.439	1	0	Available	Available
HC20	HC20-04	Colorectal epithelium	45	F	8444.42	21.2701	794.018	4	1	Available	Available
HC20	HC20-05	Colorectal epithelium	45	F	5416.42	13.2322	818.673	0	0	Available	Available
HC20	HC20-06	Colorectal epithelium	45	F	8173.86	18.7637	871.242	2	0	Available	Available
HC20	HC20-07	Colorectal epithelium	45	F	6467.06	14.7212	878.605	1	0	Available	Available
HC20	HC20-08	Colorectal epithelium	45	F	4128.03	13.491	611.968	0	0	Available	Available
HC20	HC20-09	Colorectal epithelium	45	F	5876.81	16.6026	707.939	1	0	Available	Available
HC20	HC20-10	Colorectal epithelium	45	F	5979.3	15.8863	752.762	3	0	Available	Available
HC20	HC20-11	Colorectal epithelium	45	F	8034.7	18.9641	847.359	4	0	Available	Available
HC20	HC20-12	Colorectal epithelium	45	F	6400.38	13.1746	971.624	1	0	Available	Available
HC20	HC20-13	Colorectal epithelium	45	F	6974.15	13.9842	997.433	7	0	Available	Available
HC20	HC20-14	Colorectal epithelium	45	F	5906.8	15.4189	766.177	3	0	Available	Available
HC20	HC20-15	Colorectal epithelium	45	F	7374.57	18.232	808.97	1	0	Available	Available
HC20	HC20-16	Colorectal epithelium	45	F	7199.54	17.0546	844.293	1	0	Available	Available
HC20	HC20-17	Colorectal epithelium	45	F	6553.61	15.2991	856.731	5	0	Available	Available
HC20	HC20-18	Colorectal epithelium	45	F	8460.13	16.8056	1006.82	2	0	Available	Available
HC20	HC20-19	Colorectal epithelium	45	F	4986.91	14.2501	699.912	1	0	Available	Available
HC20	HC20-20	Colorectal epithelium	45	F	9118.73	21.22	859.447	3	0	Available	Available
HC20	HC20-21	Colorectal epithelium	45	F	7497.67	15.0441	996.759	2	0	Available	Available
HC20	HC20-22	Colorectal epithelium	45	F	8196.7	19.0788	859.247	2	0	Available	Available
HC21	HC21-01	Colorectal epithelium	52	F	9425.8	19.2958	976.979	8	0	Available	Available
HC21	HC21-02	Colorectal epithelium	52	F	16657.5	39.5034	843.345	1	0	Available	Available
HC21	HC21-03	Colorectal epithelium	52	F	5956.93	17.4057	684.48	3	1	Available	Available
HC21	HC21-04	Colorectal epithelium	52	F	4612.06	13.7085	672.876	6	0	Available	Available
HC21	HC21-05	Colorectal epithelium	52	F	4599.08	14.2193	646.879	5	0	Available	Available
HC21	HC21-06	Colorectal epithelium	52	F	5605.47	14.0474	798.079	2	0	Available	Available
HC21	HC21-07	Colorectal epithelium	52	F	5132.52	13.4804	761.479	1	0	Available	Available
HC21	HC21-08	Colorectal epithelium	52	F	5508.6	13.6803	805.333	5	0	Available	Available
HC21	HC21-09	Colorectal epithelium	52	F	5372.36	13.5396	793.577	3	0	Available	Available
HC21	HC21-10	Colorectal epithelium	52	F	4331.15	13.5203	640.688	3	0	Available	Available
HC21	HC21-11	Colorectal epithelium	52	F	6270.35	16.1138	778.258	4	0	Available	Available
HC21	HC21-12	Colorectal epithelium	52	F	6721.08	19.4698	690.411	2	0	Available	Available
HC21	HC21-13	Colorectal epithelium	52	F	7163.68	19.0392	752.519	7	1	Available	Available
HC21	HC21-14	Colorectal epithelium	52	F	5126.51	18.6747	549.033	6	0	Available	Available
HC21	HC21-15	Colorectal epithelium	52	F	6835.94	20.0327	682.478	5	0	Available	Available
HC21	HC21-16	Colorectal epithelium	52	F	9106.44	25.1956	722.86	0	0	Available	Available
HC21	HC21-17	Colorectal epithelium	52	F	3019.9	14.8349	407.135	3	0	Available	Available
HC21	HC21-18	Colorectal epithelium	52	F	6282.27	13.9169	902.826	5	0	Available	Available
HC21	HC21-19	Colorectal epithelium	52	F	5376.81	18.2977	587.703	10	0	Available	Available
HC21	HC21-20	Colorectal epithelium	52	F	6927.82	19.3592	715.713	2	0	Available	Available
HC21	HC21-21	Colorectal epithelium	52	F	10257.5	18.2759	1122.52	2	0	Available	Available
HC21	HC21-22	Colorectal epithelium	52	F	6655.09	15.1996	875.693	5	0	Available	Available
HC21	HC21-23	Colorectal epithelium	52	F	7607.18	23.209	655.537	7	0	Available	Available
SA03	SA03-02	Colorectal epithelium	0	F	4142.38	17.76	466.484	2	0	Available	Available
SA03	SA03-03	Colorectal epithelium	0	F	2950.81	15.43	382.477	2	0	Available	Available
SA03	SA03-04	Colorectal epithelium	0	F	2148.87	12.78	336.286	0	0	Available	Available
SA03	SA03-05	Colorectal epithelium	0	F	5423.68	19.18	565.556	2	0	Available	Available
SA03	SA03-06	Colorectal epithelium	0	F	3253.22	16.73	388.909	2	0	Available	Available
SA03	SA03-07	Colorectal epithelium	0	F	2441.41	13.4	364.39	1	0	Available	Available
SA03	SA03-08	Colorectal epithelium	0	F	4209.57	15.2	553.891	2	0	Available	Available
SA03	SA03-09	Colorectal epithelium	0	F	3842.48	15.21	505.257	3	0	Available	Available
SA03	SA03-10	Colorectal epithelium	0	F	3615.95	16.45	439.629	1	0	Available	Available
SA03	SA03-11	Colorectal epithelium	0	F	4946.68	22.67	436.408	2	0	Available	Available
SA03	SA03-12	Colorectal epithelium	0	F	2831.27	16.1	351.711	1	0	Available	Available
SA03	SA03-13	Colorectal epithelium	0	F	3506.95	15.49	452.802	1	0	Available	Available
SA03	SA03-14	Colorectal epithelium	0	F	2913.69	16.54	352.32	2	0	Available	Available
SA03	SA03-15	Colorectal epithelium	0	F	3073.41	17.27	355.925	2	0	Available	Available
SA03	SA03-16	Colorectal epithelium	0	F	3570.82	19.96	357.798	3	0	Available	Available
SA03	SA03-17	Colorectal epithelium	0	F	4163.92	23.59	353.024	1	0	Available	Available
SA03	SA03-18	Colorectal epithelium	0	F	2890.41	15.83	365.181	3	0	Available	Available
SA03	SA03-19	Colorectal epithelium	0	F	3355.27	19.33	347.157	2	0	Available	Available
SA03	SA03-20	Colorectal epithelium	0	F	3346.2	20.88	320.517	3	0	Available	Available
SA03	SA03-21	Colorectal epithelium	0	F	3086.16	17.71	348.522	1	0	Available	Available
SA03	SA03-22	Colorectal epithelium	0	F	3651.16	23.76	307.337	4	0	Available	Available
SA03	SA03-23	Colorectal epithelium	0	F	2847.29	16.75	339.975	3	0	Available	Available
SA03	SA03-24	Colorectal epithelium	0	F	3755.57	18.6	403.825	2	0	NA	Available
SA03	SA03-25	Colorectal epithelium	0	F	4599.37	19.58	469.803	1	0	Available	Available
SA03	SA03-26	Colorectal epithelium	0	F	3083.8	20.69	298.096	1	0	Available	Available
SA03	SA03-27	Colorectal epithelium	0	F	3446.08	17.78	387.636	1	0	Available	Available
DB10	10_ALL17-3_001D3	Fibroblast	57	F	15383.5	33.0177	931.834	1	1	NA	Available
DB10	10_ALL17-5_002B3	Fibroblast	57	F	19811.9	31.6133	1253.39	2	0	NA	Available
DB10	10_ALL19-2_001B5	Fibroblast	57	F	11013.4	30.6663	718.274	1	0	NA	Available
DB10	10_ARL1-3_003G11	Fibroblast	57	F	17913.1	33.2831	1076.41	3	1	NA	Available
DB10	10_ARL10-4_001D4	Fibroblast	57	F	14941.7	31.83	938.844	13	1	NA	Available
DB10	10_ARL12-1_001B3	Fibroblast	57	F	11385.2	32.7526	695.224	7	0	NA	Available
DB10	10_ARL12-2_001C12	Fibroblast	57	F	9807.41	33.9659	577.486	2	0	NA	Available
DB10	10_ARL12-4_001H11	Fibroblast	57	F	15480.8	30.0157	1031.51	1	0	NA	Available
DB10	10_ARL13-1_001G8	Fibroblast	57	F	12617.5	32.6207	773.589	5	0	NA	Available
DB10	10_ARL23-6_002E11	Fibroblast	57	F	12380.4	33.9843	728.595	4	1	NA	Available
DB10	10_ARL3-2_006B8	Fibroblast	57	F	19018.6	32.6594	1164.66	5	0	NA	Available
DB10	10_ARL6-1_001A9	Fibroblast	57	F	15279.4	31.1338	981.531	5	0	NA	Available
DB10	10_ARL6-2_001E7	Fibroblast	57	F	8487.4	32.4936	522.404	3	1	NA	Available
DB10	10_ARL8-4_001D12	Fibroblast	57	F	5454.07	31.1968	349.656	6	1	NA	Available
DB10	10_ARL9-2_005G8	Fibroblast	57	F	15466.9	31.3892	985.492	2	0	NA	Available
DB10	10_ARL9-3_001D5	Fibroblast	57	F	9111.37	32.4517	561.534	2	0	NA	Available
DB10	10_LA14-2_001E7	Fibroblast	57	F	7872.78	32.8779	478.91	5	1	NA	Available
DB10	10_LA14-2_002D1	Fibroblast	57	F	15209.6	29.2369	1040.44	7	3	NA	Available
DB10	10_LA15-2_001D7	Fibroblast	57	F	14226.2	31.5953	900.526	3	2	NA	Available
DB10	10_LAFb11-3_001G8	Fibroblast	57	F	14320.8	29.9431	956.534	3	3	NA	Available
DB10	10_LAFb16-2_001D8	Fibroblast	57	F	8656.77	34.6549	499.599	1	0	NA	Available
DB10	10_LAFb8-2_001D4	Fibroblast	57	F	10629.5	34.7235	612.237	3	1	NA	Available
DB10	10_PLL2-2_001F4	Fibroblast	57	F	13443	31.6842	848.562	4	0	NA	Available
DB10	10_PLL4-4_003F8	Fibroblast	57	F	17635.2	34.3491	1026.82	1	1	NA	Available
DB10	10_PLL6-3_002D6	Fibroblast	57	F	13252.8	31.9158	830.485	5	3	NA	Available
DB10	10_PRL10-2_001G10	Fibroblast	57	F	15299.2	34.0426	898.827	6	1	NA	Available
DB10	10_PRL10-3_001G7	Fibroblast	57	F	8486.38	32.412	523.657	3	2	NA	Available
DB10	10_PRL10-5_001E2	Fibroblast	57	F	19219.5	28.1455	1365.72	3	0	NA	Available
DB10	10_PRL12-5_001C5	Fibroblast	57	F	7316.53	34.069	429.512	4	1	NA	Available
DB10	10_PRL16-1_001E6	Fibroblast	57	F	12042.4	30.5305	788.877	3	1	NA	Available
DB10	10_PRL2-4_002C4	Fibroblast	57	F	11633.5	32.2089	722.378	1	0	NA	Available
DB10	10_PRL3-1_001B8	Fibroblast	57	F	9156.15	30.4899	600.602	1	1	NA	Available
DB10	10_PRL3-1_001E4	Fibroblast	57	F	11163.3	31.8067	701.946	4	3	NA	Available
DB10	10_PRL3-2_002E11	Fibroblast	57	F	16414.7	32.4518	1011.64	1	1	NA	Available
DB10	10_PRL3-3_001B11	Fibroblast	57	F	7197.39	29.4519	488.756	6	1	NA	Available
DB10	10_PRL4-4_001E8	Fibroblast	57	F	9970.28	32.8006	607.933	1	0	NA	Available
DB10	10_RA9-3_005G11	Fibroblast	57	F	10130.1	24.6632	821.475	4	4	NA	Available
DB10	10_RA9-4_005B8	Fibroblast	57	F	9150.18	34.0411	537.596	3	1	NA	Available
DB10	10_UO3-2_001C6	Fibroblast	57	F	9580.57	24.213	791.358	2	1	NA	Available
DB2	2_DS5_001E1	Fibroblast	93	F	16903.3	31.3414	1078.66	1	0	NA	Available
DB2	2_Fb1_001E1	Fibroblast	93	F	14216.9	30.3355	937.311	0	0	NA	Available
DB2	2_Fb1_001G8	Fibroblast	93	F	21236.1	17.2701	2459.29	4	0	NA	Available
DB2	2_Fb11_001G2	Fibroblast	93	F	11887.8	31.0371	766.038	9	3	NA	Available
DB2	2_Fb12_001G10	Fibroblast	93	F	11175.1	32.692	683.66	11	0	NA	Available
DB2	2_Fb2_001F7	Fibroblast	93	F	20964.3	19.9883	2097.66	3	0	NA	Available
DB2	2_Fb9_001B5	Fibroblast	93	F	10725.8	31.3279	684.744	5	2	NA	Available
DB2	2_LM_001A2	Fibroblast	93	F	14343.1	36.7852	779.83	3	0	NA	Available
DB2	2_LM_001E12	Fibroblast	93	F	5932.6	24.0957	492.42	0	0	NA	Available
DB2	2_LT_Fb-12_001H9	Fibroblast	93	F	7691.81	15.4411	996.277	9	0	NA	Available
DB2	2_LT_Fb-9_001D3	Fibroblast	93	F	7202.14	26.5663	542.201	3	1	NA	Available
DB2	2_LT3Fb11_001B2	Fibroblast	93	F	17657.1	31.5809	1118.21	11	3	NA	Available
DB2	2_LT3Fb11_001C12	Fibroblast	93	F	12823.7	32.317	793.619	8	3	NA	Available
DB2	2_LTM_001C11	Fibroblast	93	F	16415.4	35.1939	932.855	3	1	NA	Available
DB2	2_LTM_001H11	Fibroblast	93	F	10774	33.3707	645.716	3	1	NA	Available
DB2	2_RM_001D1	Fibroblast	93	F	14970.5	22.0193	1359.76	1	1	NA	Available
DB2	2_RM_001F9	Fibroblast	93	F	5405.37	19.611	551.259	6	2	NA	Available
DB2	2_RT1Fb1_001B7	Fibroblast	93	F	19220.6	34.4142	1117.02	0	0	NA	Available
DB2	2_RT1Fb1_001H11	Fibroblast	93	F	26314.8	33.5964	1566.52	4	0	NA	Available
DB2	2_RT2Fb2_001A12	Fibroblast	93	F	25020.1	32.1217	1557.83	11	0	NA	Available
DB2	2_RT2Fb2_001D5	Fibroblast	93	F	15809.6	32.2345	980.912	3	2	NA	Available
DB2	2_RT2Fb2_001F11	Fibroblast	93	F	18611.1	34.2575	1086.54	3	1	NA	Available
DB2	2_RT3Fb3_001D11	Fibroblast	93	F	20269.6	33.8913	1196.15	6	1	NA	Available
DB2	2_RT3Fb3_001E9	Fibroblast	93	F	16031.6	34.8214	920.79	6	0	NA	Available
DB2	2_RT3Fb3_001G8	Fibroblast	93	F	22972.9	35.2323	1304.08	4	2	NA	Available
DB2	2_RT3Fb3_001H3a	Fibroblast	93	F	15006.7	34.8957	860.089	4	1	NA	Available
DB2	2_RTM_001C4	Fibroblast	93	F	10746.7	34.2169	628.152	1	0	NA	Available
DB3	3_LLL-1_Fb_001C3	Fibroblast	49	M	26630.4	38.3775	1387.81	3	0	NA	Available
DB3	3_LLL-1_Fb_001G4	Fibroblast	49	M	14975.5	32.9829	908.077	1	0	NA	Available
DB3	3_LLL-1_Fb_001G5	Fibroblast	49	M	20584.5	42.3924	971.141	3	0	NA	Available
DB3	3_LLL-2_Fb_001A7	Fibroblast	49	M	12215.7	23.0213	1061.25	2	1	NA	Available
DB3	3_LLL-2_Fb_001G3	Fibroblast	49	M	20552.8	42.16	974.991	4	0	NA	Available
DB3	3_LLL-2_Fb_002C5	Fibroblast	49	M	16760.6	39.1164	856.96	2	0	NA	Available
DB3	3_LLM_001B7	Fibroblast	49	M	17198.4	41.584	827.164	0	0	NA	Available
DB3	3_LLM_001C1	Fibroblast	49	M	23641.2	38.2561	1235.94	4	1	NA	Available
DB3	3_LLM_001G10	Fibroblast	49	M	18340.6	26.5552	1381.32	2	0	NA	Available
DB3	3_LP_Fb_001B12a	Fibroblast	49	M	20536.9	38.1444	1076.8	0	0	NA	Available
DB3	3_LP_Fb_001B3a	Fibroblast	49	M	9450.07	35.0888	538.637	0	0	NA	Available
DB3	3_LP_Fb_001F12	Fibroblast	49	M	23263.9	39.3076	1183.68	4	2	NA	Available
DB3	3_LP_Fb_001G9	Fibroblast	49	M	8415.19	37.3393	450.742	1	0	NA	Available
DB3	3_LSM_001B10	Fibroblast	49	M	11980.3	21.0591	1137.78	2	0	NA	Available
DB3	3_LSM_001D3	Fibroblast	49	M	21849.6	24.3042	1798.01	2	1	NA	Available
DB3	3_LT_Fb_001H11	Fibroblast	49	M	17853	39.0448	914.488	3	0	NA	Available
DB3	3_LT_Fb_001H3	Fibroblast	49	M	10495.5	28.9317	725.536	1	0	NA	Available
DB3	3_LT_Fb_001H6	Fibroblast	49	M	17876.7	40.8732	874.739	3	0	NA	Available
DB3	3_MP_Fb_001G8	Fibroblast	49	M	28427.8	40.4712	1404.84	1	0	NA	Available
DB3	3_MP_Fb_001H5	Fibroblast	49	M	14035.5	28.0107	1002.15	1	0	NA	Available
DB3	3_MP_Fb_002H12	Fibroblast	49	M	18629.2	39.0724	953.573	2	0	NA	Available
DB3	3_RCS_001D9	Fibroblast	49	M	22718.6	25.5498	1778.38	6	0	NA	Available
DB3	3_RCS_002A2	Fibroblast	49	M	21435.4	40.6626	1054.31	2	0	NA	Available
DB3	3_RCS_002H3	Fibroblast	49	M	30721.9	38.2274	1607.32	2	0	NA	Available
DB3	3_RCS_002H5	Fibroblast	49	M	19040.6	31.7252	1200.35	1	0	NA	Available
DB3	3_REM_001C3	Fibroblast	49	M	34442.2	33.6738	2045.64	1	0	NA	Available
DB3	3_REM_001H4	Fibroblast	49	M	23782.2	32.5563	1460.99	3	2	NA	Available
DB3	3_RIM_001A3	Fibroblast	49	M	21830.1	30.5218	1430.46	1	1	NA	Available
DB3	3_RIM_001B2	Fibroblast	49	M	32065.5	39.3794	1628.54	1	1	NA	Available
DB3	3_RK_001B4	Fibroblast	49	M	34555.7	36.0293	1918.2	6	4	NA	Available
DB3	3_RK_002D4	Fibroblast	49	M	30967.3	32.5344	1903.67	5	2	NA	Available
DB3	3_RLL-1_Fb_001C10	Fibroblast	49	M	16247.6	41.2532	787.701	0	0	NA	Available
DB3	3_RLL-1_Fb_001D2	Fibroblast	49	M	7925.92	35.5592	445.787	2	0	NA	Available
DB3	3_RLL-2_Fb_001F5	Fibroblast	49	M	15274.2	30.6402	997.004	4	0	NA	Available
DB3	3_RLL-2_Fb_001FG1	Fibroblast	49	M	22237.5	41.3231	1076.27	2	0	NA	Available
DB3	3_RLL-2_Fb_002B1	Fibroblast	49	M	17308.1	39.2881	881.086	3	0	NA	Available
DB3	3_RLM_001E10	Fibroblast	49	M	17207.5	39.2048	877.826	2	0	NA	Available
DB3	3_RLM_001F11	Fibroblast	49	M	12241.9	35.9679	680.713	3	0	NA	Available
DB3	3_RLM_001G7	Fibroblast	49	M	28906.2	37.3085	1549.58	1	0	NA	Available
DB3	3_RSM_001A3	Fibroblast	49	M	40420.6	39.5158	2045.79	3	0	NA	Available
DB3	3_RSM_001C12	Fibroblast	49	M	19568	37.0311	1056.84	3	0	NA	Available
DB3	3_RT_Fb_001B1	Fibroblast	49	M	17514.6	36.4583	960.802	6	0	NA	Available
DB3	3_RT_Fb_001B12	Fibroblast	49	M	22779.1	42.1815	1080.05	3	0	NA	Available
DB5	5_CT-1_Fb-1_001H3	Fibroblast	55	M	14171.8	20.737	1366.81	1	0	NA	Available
DB5	5_CT-3_Fb-1_001B3	Fibroblast	55	M	14617.5	26.0689	1121.45	4	0	NA	Available
DB5	5_CT1Fb1_002F11	Fibroblast	55	M	10928.1	17.2572	1266.5	1	1	NA	Available
DB5	5_CT3Fb1_001E3	Fibroblast	55	M	8069.71	26.814	601.903	10	0	NA	Available
DB5	5_LT-1_Fb-1_001H7	Fibroblast	55	M	18024.6	24.7454	1456.8	7	0	NA	Available
DB5	5_LT-2_DP-3_001B9	Fibroblast	55	M	17424.7	22.0838	1578.05	1	0	NA	Available
DB5	5_LT-3_DP-3_002B4	Fibroblast	55	M	13392.7	21.3964	1251.86	2	1	NA	Available
DB5	5_LT-3_Fb-1_001A9	Fibroblast	55	M	17611.2	33.6078	1048.04	0	0	NA	Available
DB5	5_LT-3_Fb-2_001B4	Fibroblast	55	M	19338.1	25.3952	1522.97	0	0	NA	Available
DB5	5_LT-4_DP-2_001G2	Fibroblast	55	M	18979.8	33.8735	1120.63	2	0	NA	Available
DB5	5_LT-4_DS-1_001B10	Fibroblast	55	M	17283.1	29.8798	1156.84	2	0	NA	Available
DB5	5_LT-4_Fb-2_001A10	Fibroblast	55	M	17979.7	35.0162	1026.94	1	0	NA	Available
DB5	5_LT1Fb1_002D2	Fibroblast	55	M	6190.64	28.4236	435.599	2	0	NA	Available
DB5	5_LT2DP3_001H12	Fibroblast	55	M	14023.4	33.3047	842.127	0	0	NA	Available
DB5	5_LT3DP1_001C8	Fibroblast	55	M	12433.2	31.6368	785.996	1	0	NA	Available
DB5	5_LT3Fb2_001G3	Fibroblast	55	M	9262.16	33.5938	551.421	0	0	NA	Available
DB5	5_LTM-1_001F12	Fibroblast	55	M	11003	30.6238	718.591	1	0	NA	Available
DB5	5_LTM-2_001E9	Fibroblast	55	M	11352.6	27.4466	827.25	1	1	NA	Available
DB5	5_LTM-5_001C8	Fibroblast	55	M	18325.2	33.4667	1095.13	0	0	NA	Available
DB5	5_LTM2_001B5	Fibroblast	55	M	10821.6	34.0216	636.161	3	0	NA	Available
DB5	5_RT-1_Fb-1_001A9	Fibroblast	55	M	24335.1	35.8116	1359.06	1	0	NA	Available
DB5	5_RT-2_Fb-1_001B12	Fibroblast	55	M	17483.9	24.9745	1400.14	1	0	NA	Available
DB5	5_RT-3_Fb-3_002E12	Fibroblast	55	M	13123.8	25.7513	1019.27	4	0	NA	Available
DB5	5_RT3Fb2_001A5	Fibroblast	55	M	4407.8	31.8896	276.441	1	0	NA	Available
DB5	5_RT3Fb2_001B1	Fibroblast	55	M	16128.8	33.346	967.36	2	0	NA	Available
DB5	5_RTM_004D8	Fibroblast	55	M	10165.8	18.6191	1091.98	2	0	NA	Available
DB5	5_RTM-2_001A12	Fibroblast	55	M	14260.9	31.4166	907.858	1	0	NA	Available
DB5	5_RTM-4_001H5	Fibroblast	55	M	23235.5	35.5984	1305.42	1	0	NA	Available
DB6	6_LAF-4_001H9	Fibroblast	70	F	14550.5	29.1732	997.525	3	1	NA	Available
DB6	6_LDA-5_001D1	Fibroblast	70	F	9447.52	21.5543	876.625	5	0	NA	Available
DB6	6_LEA-2_001E9	Fibroblast	70	F	10822	28.6863	754.507	3	2	NA	Available
DB6	6_LEBFb-1_001B11	Fibroblast	70	F	18252.6	27.4501	1329.87	0	0	NA	Available
DB6	6_LEBFb-2_002F5	Fibroblast	70	F	14623.6	23.914	1223.02	5	0	NA	Available
DB6	6_LEBM-1_001C11	Fibroblast	70	F	13885.9	26.0285	1066.98	0	0	NA	Available
DB6	6_LEBMFb-2_001H7	Fibroblast	70	F	10805.9	27.0657	798.494	5	1	NA	Available
DB6	6_LELLFb-4_001C4	Fibroblast	70	F	8813.75	18.6758	943.869	1	0	NA	Available
DB6	6_LELMUFb-1_001G2	Fibroblast	70	F	13194.6	19.4164	1359.12	1	1	NA	Available
DB6	6_LELU-2_001B2	Fibroblast	70	F	15586	16.827	1852.5	0	0	NA	Available
DB6	6_LEP-10_001E12	Fibroblast	70	F	15467	30.4672	1015.32	2	0	NA	Available
DB6	6_LEP-11_001E6	Fibroblast	70	F	9252.93	26.2647	704.591	3	0	NA	Available
DB6	6_LFA-1_001D12	Fibroblast	70	F	16447.9	23.8828	1377.38	3	0	NA	Available
DB6	6_LFA-6_001D2	Fibroblast	70	F	18334.6	32.7055	1121.19	0	0	NA	Available
DB6	6_LFA-8_001D10	Fibroblast	70	F	11252	23.517	956.925	3	0	NA	Available
DB6	6_LFAFb-4_001H12	Fibroblast	70	F	24183.7	28.1164	1720.26	7	0	NA	Available
DB6	6_LINFb-1_001B12	Fibroblast	70	F	15146.7	29.2055	1037.25	1	0	NA	Available
DB6	6_LLAA-4_001F1	Fibroblast	70	F	7853.55	27.3265	574.794	2	0	NA	Available
DB6	6_LLAAFb-5_001E8	Fibroblast	70	F	7458.46	19.359	770.542	5	0	NA	Available
DB6	6_LLAP-11_001G12	Fibroblast	70	F	19800.6	26.3406	1503.43	1	0	NA	Available
DB6	6_LLCFb-3_001A12	Fibroblast	70	F	11456	15.8452	1445.99	0	0	NA	Available
DB6	6_LLCH-2_002E5	Fibroblast	70	F	12755.6	22.5604	1130.8	9	0	NA	Available
DB6	6_LLCS-3_001E10	Fibroblast	70	F	24274.5	20.3479	2385.95	3	0	NA	Available
DB6	6_LLLA-14_001B9	Fibroblast	70	F	14905.9	30.7403	969.795	1	0	NA	Available
DB6	6_LLLA-16_001G8	Fibroblast	70	F	21665.1	18.3741	2358.22	1	0	NA	Available
DB6	6_LLLA-17_001G11	Fibroblast	70	F	14082.6	27.3995	1027.95	5	0	NA	Available
DB6	6_LLLA-22_001C6	Fibroblast	70	F	12794.8	21.3303	1199.68	3	0	NA	Available
DB6	6_LLLA-23_001B2	Fibroblast	70	F	19474.9	24.0384	1620.32	2	1	NA	Available
DB6	6_LLLA-25_001G2	Fibroblast	70	F	18968.3	25.5273	1486.12	2	0	NA	Available
DB6	6_LLLA-27_001A8	Fibroblast	70	F	8510.41	26.4328	643.928	3	0	NA	Available
DB6	6_LLLL-13_001B10	Fibroblast	70	F	21234.2	20.9239	2029.66	3	0	NA	Available
DB6	6_LLLL-16_001A3	Fibroblast	70	F	15896.6	24.4158	1302.16	5	2	NA	Available
DB6	6_LLLL-22_001H1	Fibroblast	70	F	22848.8	26.5634	1720.32	4	0	NA	Available
DB6	6_LLLL-23_001B6	Fibroblast	70	F	22410.2	24.0957	1860.1	4	0	NA	Available
DB6	6_LLLL-24_001F5	Fibroblast	70	F	15237.2	25.5266	1193.83	5	0	NA	Available
DB6	6_LMCS-10_001G11	Fibroblast	70	F	19067.4	24.0163	1587.87	1	1	NA	Available
DB6	6_LMCS-2_001F6	Fibroblast	70	F	15217.6	30.1013	1011.09	3	0	NA	Available
DB6	6_LMCS-7_001B12	Fibroblast	70	F	18242.8	20.5257	1777.56	2	0	NA	Available
DB6	6_LOF-2_002E12	Fibroblast	70	F	17432.9	27.6908	1259.11	2	0	NA	Available
DB6	6_LtHand-10_001D3	Fibroblast	70	F	8934.61	22.2458	803.263	6	0	NA	Available
DB6	6_LtHand-11_001G4	Fibroblast	70	F	9370.59	25.3007	740.738	9	0	NA	Available
DB6	6_LtHand-5_001H3	Fibroblast	70	F	11452.6	22.9235	999.202	1	0	NA	Available
DB6	6_LUAA-3_001C6	Fibroblast	70	F	14091.7	21.9334	1284.95	4	0	NA	Available
DB6	6_LUAA-4_001B11	Fibroblast	70	F	18732.4	26.7415	1401	3	2	NA	Available
DB6	6_LUAP-5_001A9	Fibroblast	70	F	15124.4	23.2301	1302.14	2	0	NA	Available
DB6	6_LUAP-6_001F5	Fibroblast	70	F	8946.62	21.4976	832.337	5	0	NA	Available
DB6	6_LUAP-8_001D2	Fibroblast	70	F	12306.7	32.1801	764.864	8	0	NA	Available
DB6	6_LUCFb-3_001H6	Fibroblast	70	F	12961.8	23.7533	1091.37	2	0	NA	Available
DB6	6_LULA-13_002A2	Fibroblast	70	F	5450.72	23.8958	456.207	3	0	NA	Available
DB6	6_LULA-26_001C12	Fibroblast	70	F	14002.5	24.7638	1130.88	1	0	NA	Available
DB6	6_LULA-28_001B3	Fibroblast	70	F	11380.8	30.2405	752.686	5	0	NA	Available
DB6	6_LULL-13_001G12	Fibroblast	70	F	10255.1	20.9433	979.32	1	0	NA	Available
DB6	6_LULP-13_001G3	Fibroblast	70	F	10410.9	25.5893	813.692	2	0	NA	Available
DB6	6_MS-10_001G6	Fibroblast	70	F	15281	20.5441	1487.63	1	1	NA	Available
DB6	6_MS-11_001B3	Fibroblast	70	F	21663.4	25.4821	1700.28	2	0	NA	Available
DB6	6_MS-13_001C5	Fibroblast	70	F	24463.1	31.3031	1562.98	1	0	NA	Available
DB6	6_MS-15_001G11	Fibroblast	70	F	19340.1	22.583	1712.8	1	1	NA	Available
DB6	6_MS-16_001F6	Fibroblast	70	F	14758.3	19.0892	1546.25	1	1	NA	Available
DB6	6_MS-17_001A10	Fibroblast	70	F	9795.52	21.9847	891.122	3	1	NA	Available
DB6	6_MS-2_001C5	Fibroblast	70	F	23852.8	22.2283	2146.17	1	0	NA	Available
DB6	6_MS-3_001F3	Fibroblast	70	F	20134.3	17.4966	2301.51	0	0	NA	Available
DB6	6_RCM-1_001C1	Fibroblast	70	F	12678.6	24.8004	1022.45	3	0	NA	Available
DB6	6_RCMFb-2_001C12	Fibroblast	70	F	16481	24.9845	1319.3	1	0	NA	Available
DB6	6_RDA-10_001H11	Fibroblast	70	F	21904	25.2482	1735.09	8	0	NA	Available
DB6	6_RDA-11_002B7	Fibroblast	70	F	24546.5	28.0704	1748.92	1	0	NA	Available
DB6	6_RDA-3_001C1	Fibroblast	70	F	18021.5	25.5222	1412.22	3	1	NA	Available
DB6	6_RDA-4_001D7	Fibroblast	70	F	10622.4	22.3529	950.427	2	0	NA	Available
DB6	6_REA-11_001B10	Fibroblast	70	F	12620.3	25.0249	1008.62	2	0	NA	Available
DB6	6_REA-4_001F7	Fibroblast	70	F	14452.1	19.6896	1467.99	2	1	NA	Available
DB6	6_REAFb-1_001D10	Fibroblast	70	F	14005.7	20.6803	1354.5	1	0	NA	Available
DB6	6_REAFb-2_001F9	Fibroblast	70	F	9796.26	27.9065	702.077	4	0	NA	Available
DB6	6_REAFb-3_001B1	Fibroblast	70	F	9947.07	22.3873	888.635	4	0	NA	Available
DB6	6_REP-1_001A5	Fibroblast	70	F	14474.6	24.7254	1170.83	5	1	NA	Available
DB6	6_REP-10_001F11	Fibroblast	70	F	11304.6	22.4067	1009.04	4	0	NA	Available
DB6	6_RFHFb-4_001B1	Fibroblast	70	F	21633.4	25.9758	1665.66	6	0	NA	Available
DB6	6_RHP-3_001B8	Fibroblast	70	F	10823.4	27.0927	798.99	2	0	NA	Available
DB6	6_RINFb-1_001B2	Fibroblast	70	F	35372.8	20.176	3506.42	4	1	NA	Available
DB6	6_RLAA-1_001B8	Fibroblast	70	F	19134.4	24.2725	1576.63	4	0	NA	Available
DB6	6_RLAA-31_001H5	Fibroblast	70	F	8421.39	26.2615	641.349	0	0	NA	Available
DB6	6_RLAAFb-2_001H8	Fibroblast	70	F	8194.16	19.5423	838.608	10	0	NA	Available
DB6	6_RLAAFb-3_001C9	Fibroblast	70	F	8452.32	17.31	976.582	8	0	NA	Available
DB6	6_RLAP-10_001H11	Fibroblast	70	F	15225.7	24.3046	1252.91	9	0	NA	Available
DB6	6_RLCFb-3_001H7	Fibroblast	70	F	12459	24.5375	1015.51	14	0	NA	Available
DB6	6_RLCH-1_001C7	Fibroblast	70	F	8573.45	22.2436	770.869	6	0	NA	Available
DB6	6_RLCH-2_001E8	Fibroblast	70	F	17290	18.9788	1822.03	8	1	NA	Available
DB6	6_RLCS-14_001H9	Fibroblast	70	F	18823.4	24.4119	1542.15	2	0	NA	Available
DB6	6_RLCS-21_001B12	Fibroblast	70	F	17811.6	28.7905	1237.32	4	0	NA	Available
DB6	6_RLCS-23_001H9	Fibroblast	70	F	20795	22.193	1874.01	2	1	NA	Available
DB6	6_RLCS-9_001D12	Fibroblast	70	F	8336.89	19.3001	863.922	1	0	NA	Available
DB6	6_RLLA-12_001E1	Fibroblast	70	F	19699.9	28.8447	1365.93	2	0	NA	Available
DB6	6_RLLP-121_001E10	Fibroblast	70	F	16579.1	25.608	1294.84	1	0	NA	Available
DB6	6_RLLP-17_001A2	Fibroblast	70	F	9805.52	24.9861	784.878	2	1	NA	Available
DB6	6_RLLP-213_001G9	Fibroblast	70	F	15769.1	24.1899	1303.78	3	0	NA	Available
DB6	6_RMCS-22_001B2	Fibroblast	70	F	20998.6	17.9456	2340.25	3	1	NA	Available
DB6	6_RMCS-34_001F2	Fibroblast	70	F	16118.9	23.8652	1350.83	1	1	NA	Available
DB6	6_RMCS-4_001A9	Fibroblast	70	F	7893.24	25.9535	608.26	1	1	NA	Available
DB6	6_RNFb-3_001F11	Fibroblast	70	F	12967.1	23.8392	1087.88	3	0	NA	Available
DB6	6_RNIFb-2_001B8	Fibroblast	70	F	36486.2	22.5869	3230.74	1	1	NA	Available
DB6	6_RtHand-1_001C3	Fibroblast	70	F	19959.6	28.2878	1411.18	7	0	NA	Available
DB6	6_RtHand-2_001A1	Fibroblast	70	F	13960	21.3326	1308.79	2	0	NA	Available
DB6	6_RtHand-4_001F8	Fibroblast	70	F	15321.9	23.7637	1289.52	3	1	NA	Available
DB6	6_RtNipple-2_001D3	Fibroblast	70	F	9507.91	24.953	762.065	1	0	NA	Available
DB6	6_RtNipple-3_001G3	Fibroblast	70	F	13023.3	26.0818	998.65	2	0	NA	Available
DB6	6_RUAA-11_001B11	Fibroblast	70	F	16609.2	28.3083	1173.45	6	0	NA	Available
DB6	6_RUAA-31_001G4	Fibroblast	70	F	11392.2	22.0485	1033.38	2	0	NA	Available
DB6	6_RUAA-4_001F3	Fibroblast	70	F	15331.7	27.9148	1098.46	5	0	NA	Available
DB6	6_RUAP-12_001C2	Fibroblast	70	F	11810.7	22.575	1046.35	8	0	NA	Available
DB6	6_RUAP-32_001D11	Fibroblast	70	F	16571.9	26.9588	1229.42	3	0	NA	Available
DB6	6_RUAP-9_001A10	Fibroblast	70	F	13327.2	22.3343	1193.43	6	0	NA	Available
DB6	6_RUC-2_001D12	Fibroblast	70	F	8679.66	17.9615	966.474	3	0	NA	Available
DB6	6_RUC-4_001D12	Fibroblast	70	F	11283.5	23.6984	952.258	8	2	NA	Available
DB6	6_RUCH-4_001E8	Fibroblast	70	F	25300	31.1994	1621.83	6	2	NA	Available
DB6	6_RULL-113_001F2	Fibroblast	70	F	16605.1	22.102	1502.59	2	0	NA	Available
DB6	6_RULL-211_001A5	Fibroblast	70	F	11954.3	21.5526	1109.31	6	0	NA	Available
DB6	6_RULP-322_001H8	Fibroblast	70	F	12755.3	24.8719	1025.68	2	0	NA	Available
DB8	8_ALLL2-2_001D7	Fibroblast	93	F	20349.2	31.4718	1293.17	6	2	NA	Available
DB8	8_ALUL1-1_001B8	Fibroblast	93	F	13026.1	36.4836	714.08	6	0	NA	Available
DB8	8_ALUL1-2_001B9	Fibroblast	93	F	13321.2	31.9262	834.5	3	0	NA	Available
DB8	8_ALUL1-3_001D11	Fibroblast	93	F	14673.9	32.2882	908.933	6	0	NA	Available
DB8	8_ARFLL1-5_001F10	Fibroblast	93	F	6993.41	26.496	527.884	3	1	NA	Available
DB8	8_ARLL1-2_001D5	Fibroblast	93	F	19453.9	33.6996	1154.55	8	1	NA	Available
DB8	8_ARLL1-7_001B10	Fibroblast	93	F	13307.6	25.7261	1034.56	4	0	NA	Available
DB8	8_ARLL2-3_001E8	Fibroblast	93	F	13555	26.122	1037.82	3	2	NA	Available
DB8	8_ARUL1-1_002G7	Fibroblast	93	F	15959.6	32.9918	967.489	5	0	NA	Available
DB8	8_LBM2_001C2	Fibroblast	93	F	10455	23.66	883.77	2	0	NA	Available
DB8	8_LBM3_001H1	Fibroblast	93	F	10084.6	32.9743	611.664	5	0	NA	Available
DB8	8_LCS3_001A11	Fibroblast	93	F	20590.8	28.6516	1437.32	1	0	NA	Available
DB8	8_LCS9_001E2	Fibroblast	93	F	23142.2	28.7575	1609.47	0	0	NA	Available
DB8	8_LLLL1-5_001B11	Fibroblast	93	F	20363.7	31.9239	1275.77	9	1	NA	Available
DB8	8_LLLL1-5_001C10	Fibroblast	93	F	13802	24.4708	1128.04	12	1	NA	Available
DB8	8_LLLL2-6_001D7	Fibroblast	93	F	26270.1	33.2624	1579.57	9	1	NA	Available
DB8	8_LLLL2-7_001B7	Fibroblast	93	F	14727.6	32.6428	902.349	6	4	NA	Available
DB8	8_LLUL2-3_001F8	Fibroblast	93	F	16837.4	34.7123	970.111	3	0	NA	Available
DB8	8_LLUL2-3_001G11	Fibroblast	93	F	17509.3	34.4431	1016.71	4	0	NA	Available
DB8	8_LRLL2-6_001F4	Fibroblast	93	F	14174.7	35.6554	795.094	3	2	NA	Available
DB8	8_LtChest1_001B10	Fibroblast	93	F	24337.3	28.5429	1705.31	3	0	NA	Available
DB8	8_LtChest4_001F5	Fibroblast	93	F	16816.6	31.6962	1061.11	5	0	NA	Available
DB8	8_LtElbow2_001G2	Fibroblast	93	F	11364.7	34.5311	658.23	15	0	NA	Available
DB8	8_LtElbow3_002E7	Fibroblast	93	F	12218.3	36.3881	671.555	15	0	NA	Available
DB8	8_LtFoot2_001G7	Fibroblast	93	F	20323.8	57.9054	701.966	7	0	NA	Available
DB8	8_LtKnee2_001B7	Fibroblast	93	F	10590.5	35.9525	589.138	4	2	NA	Available
DB8	8_LtShoulder3_001G5	Fibroblast	93	F	18608.3	27.2948	1363.51	11	1	NA	Available
DB8	8_PLFLU1-4_001A9	Fibroblast	93	F	21399.9	31.1942	1372.04	4	1	NA	Available
DB8	8_PLH4_001E2	Fibroblast	93	F	19620.1	36.1353	1085.92	8	2	NA	Available
DB8	8_PLH7_001E2	Fibroblast	93	F	22908.1	43.3927	1055.85	3	1	NA	Available
DB8	8_PLLL1-2_001F11	Fibroblast	93	F	20199.1	30.0226	1345.59	11	0	NA	Available
DB8	8_PLUL1-2_001D3	Fibroblast	93	F	10676.7	31.3746	680.595	7	0	NA	Available
DB8	8_PRFLL1-5_001G8	Fibroblast	93	F	10591.6	26.4338	801.368	1	0	NA	Available
DB8	8_PRFLU2-5_001B11	Fibroblast	93	F	9616.67	27.761	692.819	2	0	NA	Available
DB8	8_PRLL1-4_001C3	Fibroblast	93	F	16974.1	34.493	984.205	6	3	NA	Available
DB8	8_PRUL1-6_001G11	Fibroblast	93	F	13719.3	35.8475	765.426	4	1	NA	Available
DB8	8_RBM1_001G11	Fibroblast	93	F	24227.2	32.2487	1502.52	3	0	NA	Available
DB8	8_RtFoot1_001F2	Fibroblast	93	F	18139.2	31.6842	1145	6	0	NA	Available
DB8	8_RtFoot1_001F3	Fibroblast	93	F	13083	26.7162	979.406	3	1	NA	Available
DB8	8_RtFoot3_001E2	Fibroblast	93	F	6007.84	18.3453	654.973	8	1	NA	Available
DB8	8_RtFoot3_001G9	Fibroblast	93	F	14710.8	40.6151	724.401	5	2	NA	Available
DB8	8_RtHand3_001E2	Fibroblast	93	F	11863	27.3459	867.625	4	0	NA	Available
DB8	8_RtHand4_002C9	Fibroblast	93	F	7494.27	25.8564	579.684	1	0	NA	Available
DB8	8_RtKnee3_001C7	Fibroblast	93	F	20179.3	37.0246	1090.05	5	2	NA	Available
DB8	8_RTM3_001G11	Fibroblast	93	F	10031.7	23.135	867.231	3	0	NA	Available
DB8	8_UP2_003E3	Fibroblast	93	F	13226.5	37.5347	704.761	7	1	NA	Available
DB8	8_UP3_001H10	Fibroblast	93	F	15897.4	23.9973	1324.93	3	1	NA	Available
DB9	9_ALLL1-3_001B3	Fibroblast	82	M	11251	30.9611	726.783	4	3	NA	Available
DB9	9_ALLL1-4_001H8	Fibroblast	82	M	15844.7	24.4459	1296.31	5	3	NA	Available
DB9	9_ALLL1-4_001H9	Fibroblast	82	M	14862.5	27.1752	1093.83	6	3	NA	Available
DB9	9_ALUL2-4_001F2	Fibroblast	82	M	16728.1	23.6364	1415.45	4	1	NA	Available
DB9	9_ARAL1-2_001E6	Fibroblast	82	M	17059.1	36.0648	946.025	5	1	NA	Available
DB9	9_ARAL1-4_001B11	Fibroblast	82	M	7084.58	29.0379	487.954	5	0	NA	Available
DB9	9_ARAL2-2_001H2	Fibroblast	82	M	16718	33.2954	1004.22	9	1	NA	Available
DB9	9_ARLL2-2_001E2	Fibroblast	82	M	12639.6	26.2967	961.307	3	0	NA	Available
DB9	9_ARLL2-2_001G8	Fibroblast	82	M	17008.8	31.2741	1087.72	4	0	NA	Available
DB9	9_ARUL1-2_001B5	Fibroblast	82	M	10820.8	14.9227	1450.25	5	1	NA	Available
DB9	9_ARUL1-2_001G3	Fibroblast	82	M	9083.43	28.9038	628.528	6	0	NA	Available
DB9	9_ARUL1-3_001D5	Fibroblast	82	M	10296	32.6063	631.534	3	0	NA	Available
DB9	9_ARUL1-3_001F3	Fibroblast	82	M	7261.89	29.3136	495.462	5	0	NA	Available
DB9	9_ARUL1-4_001F8	Fibroblast	82	M	11114.5	48.5445	457.91	3	0	NA	Available
DB9	9_ARUL1-4_001G3	Fibroblast	82	M	6071.59	28.5195	425.785	4	0	NA	Available
DB9	9_LtFoot3_001C2	Fibroblast	82	M	27878.5	36.8473	1513.19	2	0	NA	Available
DB9	9_LtFoot3_002C11	Fibroblast	82	M	13565.3	28.7423	943.926	8	2	NA	Available
DB9	9_LtFoot4_001B4	Fibroblast	82	M	11169	32.2582	692.475	1	0	NA	Available
DB9	9_PLAL2-2_001F10	Fibroblast	82	M	9811.79	28.2258	695.236	6	3	NA	Available
DB9	9_PLAL2-2_001G5	Fibroblast	82	M	7107.8	27.5511	515.972	5	3	NA	Available
DB9	9_PLLA2-1_001C6	Fibroblast	82	M	12121.3	33.0738	732.985	3	1	NA	Available
DB9	9_PLUL1-4_001E6	Fibroblast	82	M	19751.2	29.4992	1339.1	5	0	NA	Available
DB9	9_PLUL2-1_001F11	Fibroblast	82	M	16851.5	28.6295	1177.21	2	0	NA	Available
DB9	9_PLUL2-1_002E3	Fibroblast	82	M	16750.3	30.1189	1112.28	1	0	NA	Available
DB9	9_PLUL2-3_001F8	Fibroblast	82	M	18529.7	29.6389	1250.36	3	0	NA	Available
DB9	9_PRAL1-3_001F11	Fibroblast	82	M	25274	28.7722	1756.83	7	1	NA	Available
DB9	9_PRLA1-2_001B11	Fibroblast	82	M	9383.01	31.4805	596.116	5	1	NA	Available
DB9	9_PRLA1-2_001C6	Fibroblast	82	M	5029.77	29.1418	345.193	9	3	NA	Available
DB9	9_RLA1_001B8	Fibroblast	82	M	9727.73	32.0918	606.244	4	2	NA	Available
DB9	9_RLA2_001C6	Fibroblast	82	M	8290.87	28.4819	582.185	6	1	NA	Available
DB9	9_RM_DP1_001D6	Fibroblast	82	M	4429.64	21.4425	413.165	1	0	NA	Available
DB9	9_RtKnee2_001G5	Fibroblast	82	M	20466.7	41.3568	989.762	3	1	NA	Available
DB9	9_RtKnee3_001D5	Fibroblast	82	M	8669.47	32.5014	533.483	0	0	NA	Available
DB9	9_RtKnee3_002E8	Fibroblast	82	M	14975.3	28.1263	1064.86	7	0	NA	Available
DB9	9_RUC2_001C5	Fibroblast	82	M	10554.4	27.7858	759.697	6	2	NA	Available
BM	BMH10	HSC	59	M	3623.11	12.09	599.356	5	1	NA	NA
BM	BMH100	HSC	59	M	5335.51	22.5	474.268	5	0	NA	NA
BM	BMH11	HSC	59	M	5915.81	18.69	633.045	6	1	NA	NA
BM	BMH12	HSC	59	M	16392.8	22.32	1468.89	5	1	NA	NA
BM	BMH13	HSC	59	M	3716.19	16.89	440.046	2	0	NA	NA
BM	BMH15	HSC	59	M	3649.59	11.91	612.861	1	0	NA	NA
BM	BMH17	HSC	59	M	6379.86	21.55	592.098	3	0	NA	NA
BM	BMH18	HSC	59	M	4252.08	15.71	541.321	5	1	NA	NA
BM	BMH19	HSC	59	M	5806	13.76	843.895	0	0	NA	NA
BM	BMH2	HSC	59	M	2338.38	11.01	424.774	5	1	NA	NA
BM	BMH22	HSC	59	M	8994.29	18.03	997.703	5	0	NA	NA
BM	BMH23	HSC	59	M	4883.89	17.03	573.563	2	0	NA	NA
BM	BMH25	HSC	59	M	2409.76	13.75	350.511	1	0	NA	NA
BM	BMH26	HSC	59	M	3748.84	16.49	454.68	5	0	NA	NA
BM	BMH27	HSC	59	M	2951.38	15.05	392.21	4	0	NA	NA
BM	BMH28	HSC	59	M	6931.92	13.12	1056.7	2	0	NA	NA
BM	BMH29	HSC	59	M	5204.96	9.83	1058.99	2	0	NA	NA
BM	BMH3	HSC	59	M	3594.67	10.77	667.534	3	0	NA	NA
BM	BMH30	HSC	59	M	3669.3	9.47	774.931	1	0	NA	NA
BM	BMH31	HSC	59	M	3657.09	17.87	409.299	3	0	NA	NA
BM	BMH32	HSC	59	M	2588.7	10.87	476.302	5	0	NA	NA
BM	BMH33	HSC	59	M	2540.79	14.21	357.606	0	0	NA	NA
BM	BMH34	HSC	59	M	2400.48	15.02	319.638	3	0	NA	NA
BM	BMH35	HSC	59	M	1949.87	11.59	336.475	4	0	NA	NA
BM	BMH37	HSC	59	M	1857.99	14.29	260.041	5	0	NA	NA
BM	BMH38	HSC	59	M	1487.25	7.56	393.452	1	0	NA	NA
BM	BMH39	HSC	59	M	1982.14	15.29	259.273	3	0	NA	NA
BM	BMH41	HSC	59	M	5826.63	20.21	576.609	9	0	NA	NA
BM	BMH42	HSC	59	M	5587.6	15.73	710.439	2	0	NA	NA
BM	BMH44	HSC	59	M	15804.7	23.71	1333.17	3	0	NA	NA
BM	BMH49	HSC	59	M	5306.36	18.58	571.191	3	0	NA	NA
BM	BMH5	HSC	59	M	1674.35	11.33	295.56	3	0	NA	NA
BM	BMH50	HSC	59	M	6871.99	18.11	758.917	0	0	NA	NA
BM	BMH51	HSC	59	M	4310.26	17.34	497.146	3	0	NA	NA
BM	BMH52	HSC	59	M	5717.83	21.85	523.371	4	0	NA	NA
BM	BMH55	HSC	59	M	3554.69	12.72	558.914	5	1	NA	NA
BM	BMH56	HSC	59	M	4093.15	21.03	389.268	3	1	NA	NA
BM	BMH57	HSC	59	M	3907.45	13.31	587.145	5	0	NA	NA
BM	BMH58	HSC	59	M	2224.14	12.07	368.54	7	0	NA	NA
BM	BMH59	HSC	59	M	2990.3	18.19	328.785	5	0	NA	NA
BM	BMH60	HSC	59	M	4451.92	15.71	566.763	4	0	NA	NA
BM	BMH62	HSC	59	M	3933.37	16.98	463.294	1	0	NA	NA
BM	BMH63	HSC	59	M	5867.07	21.25	552.195	3	0	NA	NA
BM	BMH65	HSC	59	M	5197.77	15.87	655.043	2	0	NA	NA
BM	BMH66	HSC	59	M	7556.75	19.32	782.272	3	0	NA	NA
BM	BMH67	HSC	59	M	5866.81	12.46	941.703	6	1	NA	NA
BM	BMH7	HSC	59	M	3861.38	16.26	474.954	1	0	NA	NA
BM	BMH71	HSC	59	M	8423.74	17.4	968.246	4	1	NA	NA
BM	BMH72	HSC	59	M	2654.51	16.21	327.515	6	1	NA	NA
BM	BMH73	HSC	59	M	5987.65	18.85	635.294	3	0	NA	NA
BM	BMH76	HSC	59	M	4961.66	24.01	413.299	9	0	NA	NA
BM	BMH77	HSC	59	M	7157.26	18.37	779.234	2	0	NA	NA
BM	BMH78	HSC	59	M	2310.48	14.09	327.96	3	0	NA	NA
BM	BMH79	HSC	59	M	2943.43	9.95	591.644	4	0	NA	NA
BM	BMH8	HSC	59	M	2309.85	11.34	407.381	3	0	NA	NA
BM	BMH80	HSC	59	M	5961.56	14.42	826.846	5	0	NA	NA
BM	BMH81	HSC	59	M	5906.55	15.98	739.243	3	1	NA	NA
BM	BMH83	HSC	59	M	5153.39	19.39	531.551	5	1	NA	NA
BM	BMH84	HSC	59	M	2812.16	14.47	388.688	5	0	NA	NA
BM	BMH85	HSC	59	M	5080.24	18.51	548.918	4	0	NA	NA
BM	BMH86	HSC	59	M	4289.08	16.23	528.537	2	0	NA	NA
BM	BMH87	HSC	59	M	3839.72	17.79	431.672	3	0	NA	NA
BM	BMH88	HSC	59	M	3458.64	21.55	320.987	3	0	NA	NA
BM	BMH89	HSC	59	M	3108.4	16.6	374.506	4	0	NA	NA
BM	BMH90	HSC	59	M	5912.26	18.15	651.489	4	0	NA	NA
BM	BMH91	HSC	59	M	2774.31	20.06	276.601	3	0	NA	NA
BM	BMH92	HSC	59	M	2407.64	16.04	300.204	4	0	NA	NA
BM	BMH93	HSC	59	M	2475.64	11.49	430.921	4	0	NA	NA
BM	BMH94	HSC	59	M	2916.94	14.34	406.826	3	1	NA	NA
BM	BMH96	HSC	59	M	4331.92	19	455.992	3	0	NA	NA
BM	BMH97	HSC	59	M	10503.9	14.7	1429.1	2	0	NA	NA
BM	BMH98	HSC	59	M	2860.91	15.72	363.983	10	2	NA	NA
BM	BMH99	HSC	59	M	3634.85	14.96	485.943	1	1	NA	NA
BM	BMP14	HSC	59	M	7423.59	19.27	770.482	2	1	NA	NA
BM	BMP15	HSC	59	M	2108.84	16.26	259.39	3	0	NA	NA
BM	BMP184	HSC	59	M	5814.3	15.75	738.324	3	1	NA	NA
BM	BMP186	HSC	59	M	7990.68	16.93	943.967	1	0	NA	NA
BM	BMP19	HSC	59	M	10714.8	18.87	1135.64	6	0	NA	NA
BM	BMP194	HSC	59	M	1234.41	15.34	160.94	3	0	NA	NA
BM	BMP2	HSC	59	M	3642.18	16.99	428.744	4	0	NA	NA
BM	BMP20	HSC	59	M	3254.42	18.18	358.022	1	0	NA	NA
BM	BMP213	HSC	59	M	4765.16	17.2	554.088	7	0	NA	NA
BM	BMP214	HSC	59	M	9837.57	16.81	1170.44	3	0	NA	NA
BM	BMP218	HSC	59	M	3893.57	15.86	490.992	1	0	NA	NA
BM	BMP234	HSC	59	M	4617.99	16.81	549.434	5	0	NA	NA
BM	BMP245	HSC	59	M	5109.68	14.9	685.863	2	0	NA	NA
BM	BMP251	HSC	59	M	2793.6	9.96	560.964	8	0	NA	NA
BM	BMP256	HSC	59	M	8620.17	24.24	711.235	2	0	NA	NA
BM	BMP262	HSC	59	M	8046.42	14.57	1104.52	10	0	NA	NA
BM	BMP265	HSC	59	M	5247.99	16.91	620.697	1	0	NA	NA
BM	BMP270	HSC	59	M	3060.35	10.81	566.207	5	0	NA	NA
BM	BMP291	HSC	59	M	2370.84	19.15	247.607	8	0	NA	NA
BM	BMP292	HSC	59	M	7521.78	11.37	1323.09	4	0	NA	NA
BM	BMP30	HSC	59	M	2962.56	17.84	332.126	2	0	NA	NA
BM	BMP305	HSC	59	M	4276.88	18.03	474.418	6	0	NA	NA
BM	BMP308	HSC	59	M	3407.61	18.59	366.607	3	1	NA	NA
BM	BMP310	HSC	59	M	1274.4	15.8	161.316	5	0	NA	NA
BM	BMP312a	HSC	59	M	5509.56	16.01	688.265	3	2	NA	NA
BM	BMP314	HSC	59	M	2281.6	17.5	260.754	5	0	NA	NA
BM	BMP316	HSC	59	M	6929.55	19.61	706.736	4	0	NA	NA
BM	BMP324	HSC	59	M	1667.56	13.76	242.378	4	0	NA	NA
BM	BMP327	HSC	59	M	3505.6	18.32	382.707	1	1	NA	NA
BM	BMP329	HSC	59	M	3614.51	18.19	397.417	4	0	NA	NA
BM	BMP330	HSC	59	M	4249.42	21.27	399.569	4	0	NA	NA
BM	BMP336	HSC	59	M	1560.13	14.1	221.295	3	0	NA	NA
BM	BMP337	HSC	59	M	2552.48	16.47	309.955	5	1	NA	NA
BM	BMP343	HSC	59	M	3292.89	18.58	354.455	10	0	NA	NA
BM	BMP344	HSC	59	M	3999.56	14	571.366	6	0	NA	NA
BM	BMP356	HSC	59	M	1462.22	17.02	171.824	2	0	NA	NA
BM	BMP362	HSC	59	M	1929.36	14.26	270.597	3	1	NA	NA
BM	BMP378	HSC	59	M	1866.95	15.64	238.74	5	0	NA	NA
BM	BMP43	HSC	59	M	2348.13	15.18	309.372	9	0	NA	NA
BM	BMP58	HSC	59	M	4300.98	18.62	461.974	3	0	NA	NA
BM	BMP67	HSC	59	M	3901.83	17.55	444.653	2	0	NA	NA
BM	BMP74	HSC	59	M	4426.27	17.07	518.602	4	0	NA	NA
BM	BMP75	HSC	59	M	2677.06	13.57	394.556	10	0	NA	NA
BM	BMP76	HSC	59	M	2947.23	14.9	395.601	1	0	NA	NA
BM	BMP83	HSC	59	M	2867.9	18.72	306.4	3	1	NA	NA
BM	BMP86	HSC	59	M	2998.72	16.92	354.459	4	0	NA	NA
BM	BMP9	HSC	59	M	2027.93	13.79	294.116	5	1	NA	NA
BM	BMP99	HSC	59	M	2514.72	11.98	419.82	3	0	NA	NA
BM	BMPBHC1	HSC	59	M	5002.55	16.29	614.187	4	0	NA	NA
BM	BMPBHC12	HSC	59	M	3653.1	15.29	477.842	3	0	NA	NA
BM	BMPBHC14	HSC	59	M	15000.8	15.11	1985.55	2	2	NA	NA
BM	BMPBHC17	HSC	59	M	5040.84	17.69	569.908	6	0	NA	NA
BM	BMPBHC18	HSC	59	M	4005.03	16.6	482.534	3	0	NA	NA
BM	BMPBHC2	HSC	59	M	16953.5	16.66	2035.23	3	1	NA	NA
BM	BMPBHC21	HSC	59	M	4520.54	17.48	517.224	5	3	NA	NA
BM	BMPBHC23	HSC	59	M	8569.16	15.2	1127.52	5	0	NA	NA
BM	BMPBHC26	HSC	59	M	4996.53	15.84	630.875	9	0	NA	NA
BM	BMPBHC28	HSC	59	M	3270.38	15.79	414.234	5	0	NA	NA
BM	BMPBHC31	HSC	59	M	2559.06	14.06	364.02	7	0	NA	NA
BM	BMPBHC33	HSC	59	M	2292.23	17.89	256.258	14	0	NA	NA
BM	BMPBHC35	HSC	59	M	3284.46	17.08	384.597	7	0	NA	NA
BM	BMPBHC36	HSC	59	M	2619.93	16.46	318.339	4	1	NA	NA
BM	BMPBHC4	HSC	59	M	3084.75	14.19	434.778	4	0	NA	NA
BM	BMPBHC40	HSC	59	M	3585.34	16.24	441.544	6	0	NA	NA
KX001	PD40521aa	HSC	29	M	4505.58	11.79	764.305	2	0	NA	NA
KX001	PD40521ab	HSC	29	M	4793.9	11.45	837.362	3	0	NA	NA
KX001	PD40521ac	HSC	29	M	4343.78	11.03	787.63	1	0	NA	NA
KX001	PD40521ad	HSC	29	M	4656.26	12.47	746.794	0	0	NA	NA
KX001	PD40521ae	HSC	29	M	3427.92	12.26	559.204	1	0	NA	NA
KX001	PD40521af	HSC	29	M	4948.05	12.77	774.949	3	0	NA	NA
KX001	PD40521ag	HSC	29	M	3682.41	11.75	626.793	0	0	NA	NA
KX001	PD40521ah	HSC	29	M	4956.33	11.98	827.434	0	0	NA	NA
KX001	PD40521ai	HSC	29	M	3444.97	11.73	587.378	3	0	NA	NA
KX001	PD40521aj	HSC	29	M	5493.18	12.76	861	0	0	NA	NA
KX001	PD40521ak	HSC	29	M	4753.82	12.98	732.484	1	0	NA	NA
KX001	PD40521al	HSC	29	M	5139.84	11.81	870.422	2	0	NA	NA
KX001	PD40521am	HSC	29	M	3954.72	12.26	645.142	4	0	NA	NA
KX001	PD40521an	HSC	29	M	3786.49	12.13	624.318	1	0	NA	NA
KX001	PD40521ao	HSC	29	M	3809.17	12.98	586.929	1	0	NA	NA
KX001	PD40521ap	HSC	29	M	4220.74	13.54	623.448	3	0	NA	NA
KX001	PD40521aq	HSC	29	M	3600.53	11.96	602.095	0	0	NA	NA
KX001	PD40521ar	HSC	29	M	4643.86	12.96	716.645	2	0	NA	NA
KX001	PD40521as	HSC	29	M	5685.48	11.96	950.749	1	0	NA	NA
KX001	PD40521at	HSC	29	M	5720.79	11.35	1008.07	2	0	NA	NA
KX001	PD40521au	HSC	29	M	3498.58	13.41	521.787	2	0	NA	NA
KX001	PD40521av	HSC	29	M	4135.6	12.46	663.82	5	0	NA	NA
KX001	PD40521aw	HSC	29	M	4289.62	13.17	651.423	3	0	NA	NA
KX001	PD40521ax	HSC	29	M	4147.16	11.92	695.832	1	0	NA	NA
KX001	PD40521ay	HSC	29	M	3983.32	12.88	618.528	3	0	NA	NA
KX001	PD40521az	HSC	29	M	7940.61	11.81	1344.73	3	0	NA	NA
KX001	PD40521ba	HSC	29	M	3915.91	12.46	628.557	1	0	NA	NA
KX001	PD40521bb	HSC	29	M	3852.94	11.37	677.738	3	0	NA	NA
KX001	PD40521bc	HSC	29	M	2886.61	11.68	494.283	2	0	NA	NA
KX001	PD40521bd	HSC	29	M	3936.73	11.63	676.996	0	0	NA	NA
KX001	PD40521be	HSC	29	M	3702.17	11.44	647.233	3	0	NA	NA
KX001	PD40521bf	HSC	29	M	3937.61	11.92	660.673	1	0	NA	NA
KX001	PD40521bg	HSC	29	M	3821.94	12.23	625.011	3	0	NA	NA
KX001	PD40521bh	HSC	29	M	5131.02	13.46	762.41	2	0	NA	NA
KX001	PD40521bi	HSC	29	M	4988.19	11.59	860.775	3	0	NA	NA
KX001	PD40521bj	HSC	29	M	2971.59	11.32	525.016	1	0	NA	NA
KX001	PD40521bk	HSC	29	M	3600.51	11.89	605.637	2	0	NA	NA
KX001	PD40521bl	HSC	29	M	3362.24	12.19	551.639	1	0	NA	NA
KX001	PD40521bm	HSC	29	M	3746.41	12.12	618.219	1	0	NA	NA
KX001	PD40521bn	HSC	29	M	4830.58	11.78	820.132	1	0	NA	NA
KX001	PD40521bo	HSC	29	M	3187.68	11.38	560.225	1	0	NA	NA
KX001	PD40521bp	HSC	29	M	5701.05	11.89	958.966	1	1	NA	NA
KX001	PD40521bq	HSC	29	M	5460.13	12.28	889.272	0	0	NA	NA
KX001	PD40521br	HSC	29	M	5392.41	12.08	892.783	2	0	NA	NA
KX001	PD40521bs	HSC	29	M	3418	11.9	574.454	0	0	NA	NA
KX001	PD40521bt	HSC	29	M	3531.42	10.88	649.158	2	0	NA	NA
KX001	PD40521bu	HSC	29	M	2886.74	11.38	507.336	2	0	NA	NA
KX001	PD40521bv	HSC	29	M	5307.18	12.5	849.149	3	0	NA	NA
KX001	PD40521bw	HSC	29	M	3214.67	11.43	562.497	1	0	NA	NA
KX001	PD40521bx	HSC	29	M	5512.26	11.31	974.759	1	0	NA	NA
KX001	PD40521by	HSC	29	M	3550.81	11.84	599.799	1	0	NA	NA
KX001	PD40521bz	HSC	29	M	3338.91	11.78	566.878	1	0	NA	NA
KX001	PD40521ca	HSC	29	M	3059.09	10.56	579.373	2	0	NA	NA
KX001	PD40521cb	HSC	29	M	3847.07	13.16	584.661	0	0	NA	NA
KX001	PD40521cc	HSC	29	M	3144.01	11.85	530.635	0	0	NA	NA
KX001	PD40521cd	HSC	29	M	4465.72	12.05	741.198	0	0	NA	NA
KX001	PD40521ce	HSC	29	M	4781.7	13.25	721.766	1	0	NA	NA
KX001	PD40521cf	HSC	29	M	4424.6	11.29	783.809	2	0	NA	NA
KX001	PD40521cg	HSC	29	M	4690.84	13.55	692.375	2	0	NA	NA
KX001	PD40521ch	HSC	29	M	4862.74	11.11	875.381	1	0	NA	NA
KX001	PD40521ci	HSC	29	M	3702.53	11.99	617.603	1	0	NA	NA
KX001	PD40521cj	HSC	29	M	3337.6	11.46	582.478	2	0	NA	NA
KX001	PD40521ck	HSC	29	M	3760.47	13.07	575.435	0	0	NA	NA
KX001	PD40521cl	HSC	29	M	3467.27	13.84	501.051	1	0	NA	NA
KX001	PD40521cm	HSC	29	M	3812.38	15.02	507.64	1	0	NA	NA
KX001	PD40521cn	HSC	29	M	2817.37	10.23	550.805	1	0	NA	NA
KX001	PD40521co	HSC	29	M	5709.01	11.89	960.304	2	0	NA	NA
KX001	PD40521cp	HSC	29	M	5241.68	21.11	496.606	4	0	NA	NA
KX001	PD40521cq	HSC	29	M	5722.18	17.55	652.1	3	0	NA	NA
KX001	PD40521cr	HSC	29	M	4309.15	16.55	520.743	2	0	NA	NA
KX001	PD40521cs	HSC	29	M	6440.85	20.67	623.208	2	0	NA	NA
KX001	PD40521ct	HSC	29	M	4368.63	16.38	533.41	0	0	NA	NA
KX001	PD40521cu	HSC	29	M	2583.65	10.78	479.341	2	0	NA	NA
KX001	PD40521cv	HSC	29	M	6659.04	11.19	1190.18	2	0	NA	NA
KX001	PD40521cw	HSC	29	M	10335.9	12.25	1687.49	1	0	NA	NA
KX001	PD40521cx	HSC	29	M	5936.01	11.73	1012.11	2	0	NA	NA
KX001	PD40521cy	HSC	29	M	4351.18	12.19	713.893	0	0	NA	NA
KX001	PD40521cz	HSC	29	M	5069.84	11.32	895.731	2	0	NA	NA
KX001	PD40521da	HSC	29	M	5150.03	12.4	830.65	1	0	NA	NA
KX001	PD40521db	HSC	29	M	3360.02	10.94	614.263	2	0	NA	NA
KX001	PD40521dc	HSC	29	M	4055.93	11.33	715.963	1	0	NA	NA
KX001	PD40521dd	HSC	29	M	4510.75	11.71	770.41	4	0	NA	NA
KX001	PD40521de	HSC	29	M	4357.71	11.14	782.354	1	0	NA	NA
KX001	PD40521df	HSC	29	M	5197.44	10.72	969.672	2	0	NA	NA
KX001	PD40521dg	HSC	29	M	5847.72	12.73	918.731	3	0	NA	NA
KX001	PD40521dh	HSC	29	M	6880.27	12.23	1125.15	4	0	NA	NA
KX001	PD40521di	HSC	29	M	5723.92	13.58	842.993	1	0	NA	NA
KX001	PD40521dj	HSC	29	M	3351.33	12.78	524.465	0	0	NA	NA
KX001	PD40521dk	HSC	29	M	3700.17	13.09	565.343	5	0	NA	NA
KX001	PD40521dl	HSC	29	M	9079.87	11.75	1545.51	1	0	NA	NA
KX001	PD40521dm	HSC	29	M	8074.5	12.26	1317.21	2	0	NA	NA
KX001	PD40521dn	HSC	29	M	6078.27	11.17	1088.32	2	0	NA	NA
KX001	PD40521do	HSC	29	M	8752	11.72	1493.52	1	0	NA	NA
KX001	PD40521dp	HSC	29	M	4180.86	12.44	672.164	1	0	NA	NA
KX001	PD40521dq	HSC	29	M	5754.32	12.22	941.787	2	0	NA	NA
KX001	PD40521dr	HSC	29	M	4037.46	12.37	652.783	1	0	NA	NA
KX001	PD40521ds	HSC	29	M	3911.97	10.95	714.515	3	0	NA	NA
KX001	PD40521dt	HSC	29	M	5962.41	12.78	933.085	1	0	NA	NA
KX001	PD40521du	HSC	29	M	8787.74	11.89	1478.17	1	0	NA	NA
KX001	PD40521dv	HSC	29	M	5541.94	11.7	947.34	0	0	NA	NA
KX001	PD40521dw	HSC	29	M	7260.53	11.37	1277.14	2	1	NA	NA
KX001	PD40521dx	HSC	29	M	7834.77	11.09	1412.94	2	0	NA	NA
KX001	PD40521dy	HSC	29	M	4735.8	10.98	862.623	3	0	NA	NA
KX001	PD40521dz	HSC	29	M	4032.6	11.58	696.477	2	0	NA	NA
KX001	PD40521ea	HSC	29	M	4906.73	11.47	855.576	3	0	NA	NA
KX001	PD40521eb	HSC	29	M	8424.81	11.8	1427.93	1	0	NA	NA
KX001	PD40521ec	HSC	29	M	8979.33	11.53	1557.56	2	0	NA	NA
KX001	PD40521ed	HSC	29	M	4234.36	11.47	738.337	2	0	NA	NA
KX001	PD40521ee	HSC	29	M	3167.69	10.71	591.539	5	0	NA	NA
KX001	PD40521ef	HSC	29	M	6649.56	11.11	1197.04	0	0	NA	NA
KX001	PD40521eg	HSC	29	M	3806.7	12.25	621.502	0	0	NA	NA
KX001	PD40521eh	HSC	29	M	3779.68	12.11	624.225	1	0	NA	NA
KX001	PD40521ei	HSC	29	M	3549.49	11.39	623.264	3	0	NA	NA
KX001	PD40521ej	HSC	29	M	4216.95	9.63	875.794	0	0	NA	NA
KX001	PD40521ek	HSC	29	M	12002.8	10.95	2192.29	3	0	NA	NA
KX001	PD40521el	HSC	29	M	6178.51	11.72	1054.35	2	0	NA	NA
KX001	PD40521em	HSC	29	M	4660.71	12.23	762.177	2	0	NA	NA
KX001	PD40521en	HSC	29	M	5990.33	12.01	997.557	3	0	NA	NA
KX001	PD40521eo	HSC	29	M	6974.05	12.03	1159.44	4	0	NA	NA
KX001	PD40521ep	HSC	29	M	2827.51	12.66	446.684	6	0	NA	NA
KX001	PD40521eq	HSC	29	M	3048.14	11.04	552.199	3	0	NA	NA
KX001	PD40521er	HSC	29	M	4495.08	11.17	804.849	2	0	NA	NA
KX001	PD40521es	HSC	29	M	5601.46	11.65	961.624	2	0	NA	NA
KX001	PD40521et	HSC	29	M	6814.96	9.94	1371.22	1	0	NA	NA
KX001	PD40521eu	HSC	29	M	5719.25	10.92	1047.48	1	0	NA	NA
KX001	PD40521ev	HSC	29	M	5913.49	11.47	1031.12	3	0	NA	NA
KX001	PD40521ew	HSC	29	M	6108.59	12.58	971.159	1	0	NA	NA
KX001	PD40521ex	HSC	29	M	3627	12.27	591.198	6	0	NA	NA
KX001	PD40521ey	HSC	29	M	5570.37	12	928.395	3	0	NA	NA
KX001	PD40521ez	HSC	29	M	6153.89	11.63	1058.28	3	0	NA	NA
KX001	PD40521fa	HSC	29	M	4651.51	11.54	806.154	1	0	NA	NA
KX001	PD40521fb	HSC	29	M	5979.24	11.27	1061.09	3	0	NA	NA
KX001	PD40521fc	HSC	29	M	6741.23	11.64	1158.29	0	0	NA	NA
KX001	PD40521fd	HSC	29	M	3443.46	12.12	568.228	1	0	NA	NA
KX001	PD40521fe	HSC	29	M	2225.51	12.09	368.157	1	0	NA	NA
KX001	PD40521ff	HSC	29	M	2961.51	10.65	556.152	0	0	NA	NA
KX001	PD40521fg	HSC	29	M	3109.3	11.34	548.377	2	0	NA	NA
KX001	PD40521fh	HSC	29	M	5958.8	11.26	1058.4	3	0	NA	NA
KX001	PD40521fi	HSC	29	M	4606.36	11.16	825.513	5	0	NA	NA
KX001	PD40521fj	HSC	29	M	8241.33	11.42	1443.32	2	0	NA	NA
KX001	PD40521fk	HSC	29	M	3295.78	10.5	627.768	1	0	NA	NA
KX001	PD40521fl	HSC	29	M	4363.62	10.75	811.836	4	0	NA	NA
KX001	PD40521fm	HSC	29	M	3477.79	12.99	535.457	4	0	NA	NA
KX001	PD40521fn	HSC	29	M	3808.52	12.3	619.272	3	0	NA	NA
KX001	PD40521fo	HSC	29	M	4983.58	11.56	862.211	0	0	NA	NA
KX001	PD40521fp	HSC	29	M	6307.43	11.52	1095.04	2	0	NA	NA
KX001	PD40521fq	HSC	29	M	5337.95	10.9	979.44	0	0	NA	NA
KX001	PD40521fr	HSC	29	M	3492.52	10.43	669.707	1	0	NA	NA
KX001	PD40521fs	HSC	29	M	5123.13	11.16	918.124	2	0	NA	NA
KX001	PD40521ft	HSC	29	M	7421.63	11.38	1304.33	3	0	NA	NA
KX001	PD40521fu	HSC	29	M	3433.82	12.47	550.733	2	0	NA	NA
KX001	PD40521fv	HSC	29	M	4679.05	12.42	753.47	1	0	NA	NA
KX001	PD40521fw	HSC	29	M	6046.23	11.75	1029.15	1	0	NA	NA
KX001	PD40521fx	HSC	29	M	6080.43	10.62	1145.09	0	0	NA	NA
KX001	PD40521fy	HSC	29	M	6734.84	10.57	1274.33	3	0	NA	NA
KX001	PD40521fz	HSC	29	M	6513.89	10.88	1197.41	2	0	NA	NA
KX001	PD40521ga	HSC	29	M	3191.09	11.09	575.49	2	0	NA	NA
KX001	PD40521gb	HSC	29	M	4816.31	11.18	861.594	0	0	NA	NA
KX001	PD40521gc	HSC	29	M	2629.93	11.07	475.145	2	0	NA	NA
KX001	PD40521gd	HSC	29	M	7336.59	12	1222.77	1	0	NA	NA
KX001	PD40521ge	HSC	29	M	4439.14	9.95	892.289	2	0	NA	NA
KX001	PD40521gf	HSC	29	M	4222.95	9.73	868.027	2	0	NA	NA
KX001	PD40521gg	HSC	29	M	7443.21	10.58	1407.03	0	0	NA	NA
KX001	PD40521gh	HSC	29	M	7256.95	11.15	1301.7	0	0	NA	NA
KX001	PD40521gi	HSC	29	M	2962.4	10.94	541.572	6	0	NA	NA
KX001	PD40521gj	HSC	29	M	3922.53	11.21	699.827	4	0	NA	NA
KX001	PD40521gk	HSC	29	M	4063.54	11.12	730.853	3	0	NA	NA
KX001	PD40521gl	HSC	29	M	2907.9	11.36	511.954	0	0	NA	NA
KX001	PD40521gm	HSC	29	M	2618.6	9.77	536.049	0	0	NA	NA
KX001	PD40521gn	HSC	29	M	4595.79	9.39	978.869	1	0	NA	NA
KX001	PD40521go	HSC	29	M	4857.98	11.08	876.892	1	0	NA	NA
KX001	PD40521gq	HSC	29	M	2919.59	9.33	625.85	0	0	NA	NA
KX001	PD40521gr	HSC	29	M	2576.3	8.32	619.303	2	0	NA	NA
KX001	PD40521gt	HSC	29	M	4186.81	14.07	595.14	0	0	NA	NA
KX001	PD40521gu	HSC	29	M	3555.66	12.49	569.361	1	0	NA	NA
KX001	PD40521gv	HSC	29	M	4088.98	12.34	662.72	4	0	NA	NA
KX001	PD40521gw	HSC	29	M	3233.59	8.95	722.59	3	0	NA	NA
KX001	PD40521gx	HSC	29	M	2961.02	9.86	600.613	4	0	NA	NA
KX001	PD40521gy	HSC	29	M	2248.84	9.97	451.121	2	0	NA	NA
KX001	PD40521gz	HSC	29	M	3490.68	11.69	597.208	3	0	NA	NA
KX001	PD40521ha	HSC	29	M	5310.75	15.68	677.392	2	0	NA	NA
KX001	PD40521hb	HSC	29	M	5937.61	14.04	845.813	3	0	NA	NA
KX001	PD40521hc	HSC	29	M	5277.61	12.67	833.088	0	0	NA	NA
KX001	PD40521hd	HSC	29	M	4014.52	11.25	713.692	0	0	NA	NA
KX001	PD40521hf	HSC	29	M	3241.23	9.81	660.801	4	0	NA	NA
KX001	PD40521hg	HSC	29	M	3799.34	10.55	720.254	0	0	NA	NA
KX001	PD40521hh	HSC	29	M	2075.47	11.32	366.691	3	0	NA	NA
KX001	PD40521hi	HSC	29	M	7001.63	14.28	980.62	2	0	NA	NA
KX001	PD40521hj	HSC	29	M	4776.92	11.64	820.777	3	0	NA	NA
KX001	PD40521hk	HSC	29	M	1077.99	10.59	203.586	2	0	NA	NA
KX001	PD40521hl	HSC	29	M	3759.98	10.56	712.117	2	0	NA	NA
KX001	PD40521hm	HSC	29	M	5076.58	12.24	829.507	1	0	NA	NA
KX001	PD40521hn	HSC	29	M	3070.32	9.4	653.26	3	0	NA	NA
KX001	PD40521ho	HSC	29	M	4290.33	11.41	752.03	2	0	NA	NA
KX001	PD40521hp	HSC	29	M	2631.69	9.7	542.616	1	0	NA	NA
KX001	PD40521hq	HSC	29	M	3254.87	9.75	667.666	3	0	NA	NA
KX001	PD40521hr	HSC	29	M	6326.76	8.81	1436.27	2	0	NA	NA
KX001	PD40521hs	HSC	29	M	3442.45	13.24	520.008	1	0	NA	NA
KX001	PD40521ht	HSC	29	M	3381.61	10.61	637.438	1	0	NA	NA
KX001	PD40521hu	HSC	29	M	4039.48	10.38	778.32	2	0	NA	NA
KX001	PD40521hv	HSC	29	M	2238.05	8.84	506.346	2	0	NA	NA
KX001	PD40521hx	HSC	29	M	2997.41	12.74	470.551	2	0	NA	NA
KX001	PD40521hy	HSC	29	M	3147.39	10.13	621.4	1	0	NA	NA
KX001	PD40521hz	HSC	29	M	2654.81	11.36	467.396	1	0	NA	NA
KX001	PD40521ia	HSC	29	M	6526.37	12.76	1022.94	3	0	NA	NA
KX001	PD40521ib	HSC	29	M	2645.82	9.72	544.407	1	0	NA	NA
KX001	PD40521ic	HSC	29	M	3191.83	9.43	676.952	2	0	NA	NA
KX001	PD40521id	HSC	29	M	3719.47	14.14	526.092	2	0	NA	NA
KX001	PD40521ie	HSC	29	M	1929.84	8.06	478.868	0	0	NA	NA
KX001	PD40521if	HSC	29	M	3076.7	12.25	502.318	3	0	NA	NA
KX001	PD40521ig	HSC	29	M	4746.97	11.65	814.93	1	0	NA	NA
KX001	PD40521ih	HSC	29	M	4633.01	11.87	780.625	2	0	NA	NA
KX001	PD40521ii	HSC	29	M	3997.7	10.65	750.742	2	0	NA	NA
KX001	PD40521ij	HSC	29	M	2541.24	8.63	588.932	2	0	NA	NA
KX001	PD40521ik	HSC	29	M	5766.15	12.5	922.584	1	0	NA	NA
KX001	PD40521il	HSC	29	M	4610.09	15.55	592.938	5	0	NA	NA
KX001	PD40521in	HSC	29	M	3059.16	8.74	700.037	1	0	NA	NA
KX001	PD40521io	HSC	29	M	5897.82	14.34	822.569	4	0	NA	NA
KX001	PD40521ip	HSC	29	M	2887.71	12.5	462.034	1	0	NA	NA
KX001	PD40521iq	HSC	29	M	2761.78	10.74	514.298	3	0	NA	NA
KX001	PD40521ir	HSC	29	M	3855.91	10.57	729.595	1	0	NA	NA
KX001	PD40521is	HSC	29	M	3480.54	8.87	784.789	0	0	NA	NA
KX001	PD40521it	HSC	29	M	3883.43	15.86	489.714	1	0	NA	NA
KX001	PD40521iu	HSC	29	M	4061.65	11.8	688.415	2	0	NA	NA
KX001	PD40521iv	HSC	29	M	2336.67	9.95	469.682	2	0	NA	NA
KX001	PD40521iw	HSC	29	M	3048.38	12.41	491.278	7	0	NA	NA
KX001	PD40521ix	HSC	29	M	3475.81	10.19	682.2	1	0	NA	NA
KX001	PD40521iy	HSC	29	M	3323.42	10.99	604.808	2	1	NA	NA
KX001	PD40521iz	HSC	29	M	3112.79	8.78	709.064	4	0	NA	NA
KX001	PD40521ja	HSC	29	M	3971.79	9.6	827.456	2	0	NA	NA
KX001	PD40521jb	HSC	29	M	2615.71	8.64	605.488	8	1	NA	NA
KX001	PD40521jc	HSC	29	M	4495.44	11.58	776.415	1	1	NA	NA
KX001	PD40521jd	HSC	29	M	3136.68	12.4	505.916	0	0	NA	NA
KX001	PD40521je	HSC	29	M	3450.45	11.43	603.753	2	1	NA	NA
KX001	PD40521jf	HSC	29	M	4423.37	13.43	658.73	1	0	NA	NA
KX001	PD40521jg	HSC	29	M	3628.45	11.28	643.342	2	0	NA	NA
KX001	PD40521jh	HSC	29	M	2588.94	10.59	488.941	0	0	NA	NA
KX001	PD40521ji	HSC	29	M	2927.38	11.04	530.322	0	0	NA	NA
KX001	PD40521jk	HSC	29	M	4620.56	11	840.102	3	0	NA	NA
KX001	PD40521jl	HSC	29	M	3214.74	9.74	660.111	2	0	NA	NA
KX001	PD40521jm	HSC	29	M	4607.67	15.23	605.078	5	0	NA	NA
KX001	PD40521jn	HSC	29	M	4567.27	17.38	525.578	4	0	NA	NA
KX001	PD40521jo	HSC	29	M	3606.19	10.58	681.699	2	0	NA	NA
KX001	PD40521jp	HSC	29	M	3299.4	11.19	589.705	1	0	NA	NA
KX001	PD40521js	HSC	29	M	5174.34	9.79	1057.07	1	0	NA	NA
KX001	PD40521ju	HSC	29	M	2634.06	11.28	467.032	1	0	NA	NA
KX001	PD40521jv	HSC	29	M	2374.46	10.15	467.874	1	0	NA	NA
KX001	PD40521jx	HSC	29	M	3599.73	9.94	724.292	2	0	NA	NA
KX001	PD40521jy	HSC	29	M	4489.59	8.06	1114.04	4	0	NA	NA
KX001	PD40521jz	HSC	29	M	2538.86	9.27	547.758	0	0	NA	NA
KX001	PD40521ka	HSC	29	M	2475.94	8.35	593.04	1	0	NA	NA
KX001	PD40521kb	HSC	29	M	3017.21	10.81	558.226	1	0	NA	NA
KX001	PD40521kc	HSC	29	M	3312.2	10.13	653.939	1	0	NA	NA
KX001	PD40521kd	HSC	29	M	1530.45	12.53	244.286	1	0	NA	NA
KX001	PD40521ke	HSC	29	M	5920.3	13.36	886.272	2	0	NA	NA
KX001	PD40521kf	HSC	29	M	5452.74	12.71	858.024	2	0	NA	NA
KX001	PD40521kg	HSC	29	M	4118.58	11.74	701.632	5	0	NA	NA
KX001	PD40521kh	HSC	29	M	3786.79	11.13	680.465	1	0	NA	NA
KX001	PD40521ki	HSC	29	M	2948.07	10.33	570.778	5	0	NA	NA
KX001	PD40521kj	HSC	29	M	2705.4	11.61	466.047	1	0	NA	NA
KX001	PD40521kk	HSC	29	M	3196.13	10.79	592.424	2	0	NA	NA
KX001	PD40521kl	HSC	29	M	3213.47	10.32	622.766	2	0	NA	NA
KX001	PD40521km	HSC	29	M	3280.74	11.38	576.58	2	0	NA	NA
KX001	PD40521kn	HSC	29	M	3514.45	11.39	617.112	0	0	NA	NA
KX001	PD40521ko	HSC	29	M	4137.05	11.71	706.584	0	0	NA	NA
KX001	PD40521kp	HSC	29	M	1050.55	10.82	194.187	1	0	NA	NA
KX001	PD40521kq	HSC	29	M	2239.87	10.87	412.12	0	0	NA	NA
KX001	PD40521kr	HSC	29	M	3028.34	12.26	494.02	3	0	NA	NA
KX001	PD40521ks	HSC	29	M	3652.2	11.95	611.247	4	1	NA	NA
KX001	PD40521kt	HSC	29	M	5245.76	12.62	831.341	3	0	NA	NA
KX001	PD40521ku	HSC	29	M	4005.96	13.09	612.064	3	0	NA	NA
KX001	PD40521kv	HSC	29	M	7160.45	13.27	1079.19	2	1	NA	NA
KX001	PD40521kw	HSC	29	M	7242.67	11.5	1259.59	2	0	NA	NA
KX001	PD40521kx	HSC	29	M	3637.37	12.17	597.76	0	0	NA	NA
KX001	PD40521ky	HSC	29	M	3181.69	11.84	537.448	1	0	NA	NA
KX001	PD40521kz	HSC	29	M	3023.31	13.12	460.87	1	0	NA	NA
KX001	PD40521la	HSC	29	M	3311.74	12.85	515.446	2	0	NA	NA
KX001	PD40521lb	HSC	29	M	4866.85	11.59	839.836	4	0	NA	NA
KX001	PD40521lc	HSC	29	M	3579.58	12.58	569.091	3	0	NA	NA
KX001	PD40521ld	HSC	29	M	5420.2	11.39	951.747	1	0	NA	NA
KX001	PD40521le	HSC	29	M	5825.95	12.11	962.172	3	0	NA	NA
KX001	PD40521lf	HSC	29	M	2862.04	11.5	497.746	0	0	NA	NA
KX001	PD40521lg	HSC	29	M	3544.2	12.05	588.249	2	0	NA	NA
KX001	PD40521lh	HSC	29	M	5601.58	12.15	922.071	1	0	NA	NA
KX001	PD40521li	HSC	29	M	2605.81	11.02	472.924	0	0	NA	NA
KX001	PD40521lj	HSC	29	M	2904.55	11.26	515.906	1	0	NA	NA
KX001	PD40521lk	HSC	29	M	2345.25	10.83	433.102	3	0	NA	NA
KX001	PD40521ll	HSC	29	M	5172.97	11.46	902.787	1	0	NA	NA
KX001	PD40521lm	HSC	29	M	2344.03	11.5	407.657	2	0	NA	NA
KX001	PD40521ln	HSC	29	M	3956.48	11.17	708.412	4	0	NA	NA
KX001	PD40521lo	HSC	29	M	4212.77	11.2	752.28	2	0	NA	NA
KX001	PD40521lp	HSC	29	M	3018.55	10.69	564.743	0	0	NA	NA
KX001	PD40521lq	HSC	29	M	4171.17	12.66	658.953	0	0	NA	NA
KX001	PD40521lr	HSC	29	M	4283.57	11.05	775.307	2	0	NA	NA
KX001	PD40521ls	HSC	29	M	3168.67	10.84	584.625	2	0	NA	NA
KX001	PD40521lt	HSC	29	M	3596.88	11.73	613.279	6	0	NA	NA
KX001	PD40521lu	HSC	29	M	1720.62	10.22	336.716	2	0	NA	NA
KX001	PD40521lv	HSC	29	M	3893.75	10.86	717.081	1	0	NA	NA
KX001	PD40521lw	HSC	29	M	2546.84	10.98	463.905	2	0	NA	NA
KX001	PD40521lx	HSC	29	M	4641.15	11.25	825.093	1	0	NA	NA
KX001	PD40521ly	HSC	29	M	3587.72	11.35	632.197	2	0	NA	NA
KX001	PD40521lz	HSC	29	M	3325.25	11.71	567.933	5	0	NA	NA
KX001	PD40521ma	HSC	29	M	3297.22	12.38	532.669	3	0	NA	NA
KX001	PD40521mb	HSC	29	M	4560.87	12.04	757.62	1	0	NA	NA
KX001	PD40521mc	HSC	29	M	3875.3	10.39	745.967	1	0	NA	NA
KX001	PD40521md	HSC	29	M	3560.21	11.11	640.902	2	0	NA	NA
KX001	PD40521me	HSC	29	M	2500.63	11.79	424.195	3	0	NA	NA
KX001	PD40521mf	HSC	29	M	4512.9	11.81	764.251	1	0	NA	NA
KX001	PD40521mg	HSC	29	M	2576.85	9.32	552.972	3	0	NA	NA
KX001	PD40521mh	HSC	29	M	4142.75	12.52	661.781	2	0	NA	NA
KX001	PD40521mi	HSC	29	M	4015.37	11.07	725.451	2	0	NA	NA
KX001	PD40521mj	HSC	29	M	4407.85	14.06	627.006	1	0	NA	NA
KX001	PD40521mk	HSC	29	M	4565.39	11.59	787.815	0	0	NA	NA
KX001	PD40521ml	HSC	29	M	3082.39	10.72	575.073	3	0	NA	NA
KX001	PD40521mm	HSC	29	M	2994.87	10.88	550.528	2	0	NA	NA
KX001	PD40521mn	HSC	29	M	2990.06	10.84	551.672	2	0	NA	NA
KX001	PD40521mo	HSC	29	M	3188.31	11.45	556.91	4	0	NA	NA
KX001	PD40521mp	HSC	29	M	2544.94	10.32	493.205	3	0	NA	NA
KX001	PD40521mq	HSC	29	M	4058.55	10.31	787.304	1	0	NA	NA
KX001	PD40521mr	HSC	29	M	4257.27	12.3	692.239	1	0	NA	NA
KX001	PD40521ms	HSC	29	M	3987.77	10.26	777.343	5	0	NA	NA
KX001	PD40521mt	HSC	29	M	5384.79	10.65	1011.23	4	0	NA	NA
KX001	PD40521mu	HSC	29	M	1552.46	11.86	261.798	6	0	NA	NA
KX001	PD40521mv	HSC	29	M	2532.48	11.38	445.076	0	0	NA	NA
KX001	PD40521mw	HSC	29	M	2982.01	11.95	499.081	3	0	NA	NA
KX001	PD40521mx	HSC	29	M	4673.73	13.87	673.934	1	0	NA	NA
KX001	PD40521my	HSC	29	M	3190.25	11.73	543.947	6	0	NA	NA
KX001	PD40521mz	HSC	29	M	4072.42	12.72	640.318	0	0	NA	NA
KX001	PD40521n	HSC	29	M	10915.1	22.4	974.562	2	0	NA	NA
KX001	PD40521na	HSC	29	M	1053.91	12.93	163.018	3	1	NA	NA
KX001	PD40521nb	HSC	29	M	3837.23	10.01	766.679	0	0	NA	NA
KX001	PD40521nc	HSC	29	M	4305.46	9.81	877.77	3	0	NA	NA
KX001	PD40521nd	HSC	29	M	4145.08	11.2	740.193	1	0	NA	NA
KX001	PD40521ne	HSC	29	M	3343.52	10.77	620.895	4	0	NA	NA
KX001	PD40521nf	HSC	29	M	4280.92	10.94	782.618	2	0	NA	NA
KX001	PD40521ng	HSC	29	M	3886.24	14.28	544.291	4	0	NA	NA
KX001	PD40521nh	HSC	29	M	3015.57	12.45	484.429	1	0	NA	NA
KX001	PD40521ni	HSC	29	M	5718.57	11	1039.74	2	0	NA	NA
KX001	PD40521nj	HSC	29	M	4798.38	11.98	801.065	1	0	NA	NA
KX001	PD40521nk	HSC	29	M	2629.01	9.9	531.113	3	0	NA	NA
KX001	PD40521nl	HSC	29	M	5335.16	11.09	962.157	0	0	NA	NA
KX001	PD40521nm	HSC	29	M	2411.28	10.5	459.291	2	0	NA	NA
KX001	PD40521nn	HSC	29	M	4678.04	10.33	905.719	1	0	NA	NA
KX001	PD40521no	HSC	29	M	5740.48	10.18	1127.8	0	0	NA	NA
KX001	PD40521np	HSC	29	M	3773.5	11.53	654.553	1	0	NA	NA
KX001	PD40521nq	HSC	29	M	3611.48	10.31	700.578	2	0	NA	NA
KX001	PD40521nr	HSC	29	M	3799.44	10.31	737.04	5	0	NA	NA
KX001	PD40521ns	HSC	29	M	3014.45	12.06	499.909	2	0	NA	NA
KX001	PD40521nt	HSC	29	M	2862.62	10.38	551.565	6	0	NA	NA
KX001	PD40521nu	HSC	29	M	2087.93	10.02	416.752	3	0	NA	NA
KX001	PD40521nv	HSC	29	M	3293.35	11.46	574.756	2	0	NA	NA
KX001	PD40521nw	HSC	29	M	4710.72	9.9	951.661	1	0	NA	NA
KX001	PD40521nx	HSC	29	M	3232.42	10.48	616.874	0	0	NA	NA
KX001	PD40521ny	HSC	29	M	6138.25	12.12	1012.91	0	0	NA	NA
KX001	PD40521nz	HSC	29	M	4612.36	12.42	742.731	0	0	NA	NA
KX001	PD40521o	HSC	29	M	7958.98	23.38	680.837	1	0	NA	NA
KX001	PD40521oa	HSC	29	M	2760.32	11.96	461.592	0	0	NA	NA
KX001	PD40521ob	HSC	29	M	4325.8	14.17	610.558	2	0	NA	NA
KX001	PD40521oc	HSC	29	M	4373.48	11.15	784.481	3	0	NA	NA
KX001	PD40521od	HSC	29	M	4715.42	12.2	773.02	2	0	NA	NA
KX001	PD40521oe	HSC	29	M	2964.72	11.77	503.776	0	0	NA	NA
KX001	PD40521of	HSC	29	M	2681.07	9.28	577.817	1	0	NA	NA
KX001	PD40521og	HSC	29	M	4240.02	11.56	733.567	3	0	NA	NA
KX001	PD40521p	HSC	29	M	7542.3	21.37	705.877	2	0	NA	NA
KX001	PD40521q	HSC	29	M	8326.92	23.44	710.488	1	1	NA	NA
KX001	PD40521r	HSC	29	M	8284.4	26.91	615.712	0	0	NA	NA
KX001	PD40521s	HSC	29	M	7239.82	21.72	666.65	2	0	NA	NA
KX001	PD40521t	HSC	29	M	9805.36	24.79	791.074	2	0	NA	NA
KX001	PD40521u	HSC	29	M	8159.15	21.42	761.825	2	0	NA	NA
KX001	PD40521v	HSC	29	M	9540.21	22.79	837.228	2	0	NA	NA
KX001	PD40521w	HSC	29	M	9855.74	26.08	755.808	4	0	NA	NA
KX001	PD40521wt	HSC	29	M	10274.7	16.9	1215.94	1	0	NA	NA
KX001	PD40521wu	HSC	29	M	14177.4	14.68	1931.53	1	0	NA	NA
KX001	PD40521wv	HSC	29	M	10980.8	30.96	709.354	2	0	NA	NA
KX001	PD40521ww	HSC	29	M	2088.05	21.76	191.916	1	0	NA	NA
KX001	PD40521wx	HSC	29	M	8109.81	26.49	612.292	3	0	NA	NA
KX001	PD40521wy	HSC	29	M	9504.41	25.85	735.351	1	0	NA	NA
KX001	PD40521wz	HSC	29	M	10414	30.09	692.19	4	0	NA	NA
KX001	PD40521x	HSC	29	M	4888.29	12.94	755.532	1	0	NA	NA
KX001	PD40521xa	HSC	29	M	5037.87	20.33	495.609	0	0	NA	NA
KX001	PD40521xb	HSC	29	M	6854.37	40.48	338.655	1	0	NA	NA
KX001	PD40521xc	HSC	29	M	3416.44	20.96	325.996	3	1	NA	NA
KX001	PD40521xd	HSC	29	M	13459.9	39.31	684.808	2	0	NA	NA
KX001	PD40521xe	HSC	29	M	6315.62	21.4	590.245	0	0	NA	NA
KX001	PD40521xf	HSC	29	M	12542.2	21.11	1188.27	3	0	NA	NA
KX001	PD40521xg	HSC	29	M	7090.04	17.99	788.22	4	1	NA	NA
KX001	PD40521xh	HSC	29	M	9513.77	15.98	1190.71	2	0	NA	NA
KX001	PD40521xi	HSC	29	M	2892.86	14.38	402.345	1	0	NA	NA
KX001	PD40521xj	HSC	29	M	6674.23	14.41	926.333	4	0	NA	NA
KX001	PD40521xk	HSC	29	M	8867.03	20.82	851.78	1	0	NA	NA
KX001	PD40521xl	HSC	29	M	3646.17	14.96	487.456	2	0	NA	NA
KX001	PD40521xm	HSC	29	M	3929.18	25.26	311.099	3	0	NA	NA
KX001	PD40521xn	HSC	29	M	5541.55	28.8	384.83	4	0	NA	NA
KX001	PD40521xo	HSC	29	M	3817.82	37.92	201.362	2	0	NA	NA
KX001	PD40521xq	HSC	29	M	6076.66	18.03	674.061	5	1	NA	NA
KX001	PD40521xr	HSC	29	M	1753.13	11.08	316.449	2	0	NA	NA
KX001	PD40521y	HSC	29	M	6086.31	13.6	895.046	4	0	NA	NA
KX001	PD40521z	HSC	29	M	3157.89	11.28	559.91	0	0	NA	NA
KX004	PD45534ad	HSC	78	F	1914.29	13.55	282.552	2	0	NA	NA
KX004	PD45534af	HSC	78	F	1364.52	11.49	237.514	2	1	NA	NA
KX004	PD45534ag	HSC	78	F	3757.55	12.38	607.036	2	0	NA	NA
KX004	PD45534ah	HSC	78	F	3428.37	13.34	513.999	2	0	NA	NA
KX004	PD45534aj	HSC	78	F	2301.94	16.18	284.541	3	1	NA	NA
KX004	PD45534al	HSC	78	F	2840.53	13.95	407.244	4	0	NA	NA
KX004	PD45534am	HSC	78	F	2454.67	16.65	294.855	6	0	NA	NA
KX004	PD45534an	HSC	78	F	1692.75	13.96	242.514	2	0	NA	NA
KX004	PD45534ap	HSC	78	F	3652.1	12.45	586.683	4	0	NA	NA
KX004	PD45534aq	HSC	78	F	3108.46	11.93	521.117	1	0	NA	NA
KX004	PD45534as	HSC	78	F	3176.38	11.78	539.284	1	0	NA	NA
KX004	PD45534au	HSC	78	F	3788.91	14.25	531.777	6	0	NA	NA
KX004	PD45534av	HSC	78	F	2635.86	12.6	418.39	4	0	NA	NA
KX004	PD45534ay	HSC	78	F	2918.89	12.78	456.79	1	0	NA	NA
KX004	PD45534b	HSC	78	F	1916.98	17.66	217.099	9	0	NA	NA
KX004	PD45534bb	HSC	78	F	3547	9.39	755.485	5	1	NA	NA
KX004	PD45534bc	HSC	78	F	1889.73	11.94	316.538	3	1	NA	NA
KX004	PD45534bd	HSC	78	F	1058.27	12.13	174.488	3	2	NA	NA
KX004	PD45534be	HSC	78	F	2221.92	11.67	380.792	3	0	NA	NA
KX004	PD45534bf	HSC	78	F	456.339	12.62	72.32	3	0	NA	NA
KX004	PD45534bi	HSC	78	F	3280.17	13	504.642	5	0	NA	NA
KX004	PD45534bk	HSC	78	F	6489.4	15.32	847.18	3	0	NA	NA
KX004	PD45534bl	HSC	78	F	1159.51	16.1	144.039	2	0	NA	NA
KX004	PD45534bo	HSC	78	F	1605.34	13.92	230.652	1	0	NA	NA
KX004	PD45534bp	HSC	78	F	2229.48	11.75	379.486	3	1	NA	NA
KX004	PD45534bq	HSC	78	F	3156.15	12.41	508.646	7	0	NA	NA
KX004	PD45534br	HSC	78	F	393.244	13.16	59.7635	2	0	NA	NA
KX004	PD45534bt	HSC	78	F	1958.28	13.89	281.97	3	2	NA	NA
KX004	PD45534bu	HSC	78	F	188.087	13.26	28.3691	2	0	NA	NA
KX004	PD45534bv	HSC	78	F	5016.06	12.01	835.314	3	0	NA	NA
KX004	PD45534c	HSC	78	F	220.372	22.62	19.4847	5	0	NA	NA
KX004	PD45534ct	HSC	78	F	1984.39	14.52	273.332	3	0	NA	NA
KX004	PD45534cu	HSC	78	F	6095.11	13.96	873.225	3	0	NA	NA
KX004	PD45534cv	HSC	78	F	1292.08	11.8	218.997	0	0	NA	NA
KX004	PD45534cw	HSC	78	F	5547.12	12.42	893.256	6	0	NA	NA
KX004	PD45534cy	HSC	78	F	4975.82	14.53	684.903	1	0	NA	NA
KX004	PD45534cz	HSC	78	F	1937.36	14.28	271.339	5	1	NA	NA
KX004	PD45534dc	HSC	78	F	3615.71	12.74	567.615	2	1	NA	NA
KX004	PD45534de	HSC	78	F	2092.79	13.78	303.743	4	0	NA	NA
KX004	PD45534df	HSC	78	F	2847.39	14.3	398.236	5	1	NA	NA
KX004	PD45534dg	HSC	78	F	8220.28	12.67	1297.6	7	1	NA	NA
KX004	PD45534dh	HSC	78	F	2390.94	15.96	299.617	5	0	NA	NA
KX004	PD45534di	HSC	78	F	6656.97	22.66	587.553	1	0	NA	NA
KX004	PD45534dj	HSC	78	F	4989.55	20.91	477.241	1	0	NA	NA
KX004	PD45534dk	HSC	78	F	2308.49	12.13	380.625	2	0	NA	NA
KX004	PD45534dl	HSC	78	F	1722.09	12.87	267.613	5	0	NA	NA
KX004	PD45534dm	HSC	78	F	1558.29	13.52	230.516	4	0	NA	NA
KX004	PD45534dn	HSC	78	F	6860.07	16.57	828.011	5	0	NA	NA
KX004	PD45534do	HSC	78	F	4912.56	14.68	669.286	5	0	NA	NA
KX004	PD45534dp	HSC	78	F	1224.56	12.69	192.996	0	0	NA	NA
KX004	PD45534dq	HSC	78	F	2418.44	12.26	394.525	1	1	NA	NA
KX004	PD45534ds	HSC	78	F	6784.36	15.15	895.625	3	0	NA	NA
KX004	PD45534dt	HSC	78	F	1928.26	11.16	345.566	2	0	NA	NA
KX004	PD45534du	HSC	78	F	5937.3	14.03	846.372	2	0	NA	NA
KX004	PD45534dv	HSC	78	F	2052.74	16.11	254.84	1	0	NA	NA
KX004	PD45534dw	HSC	78	F	1467.34	13.01	225.571	2	0	NA	NA
KX004	PD45534dx	HSC	78	F	3272.87	13.18	496.642	3	0	NA	NA
KX004	PD45534dy	HSC	78	F	1823.35	12.74	286.24	2	0	NA	NA
KX004	PD45534dz	HSC	78	F	1386.86	14.75	188.049	2	1	NA	NA
KX004	PD45534e	HSC	78	F	3516.85	18.24	385.62	6	2	NA	NA
KX004	PD45534eb	HSC	78	F	3111.29	12.11	513.838	2	1	NA	NA
KX004	PD45534ec	HSC	78	F	3116.66	14.64	425.773	2	1	NA	NA
KX004	PD45534ee	HSC	78	F	4170.2	11.38	732.9	2	1	NA	NA
KX004	PD45534ef	HSC	78	F	5578.89	17.14	650.979	1	0	NA	NA
KX004	PD45534eg	HSC	78	F	2295.71	15.25	301.077	1	0	NA	NA
KX004	PD45534eh	HSC	78	F	2412.71	15.55	310.316	0	0	NA	NA
KX004	PD45534ei	HSC	78	F	4490.01	15.29	587.313	3	0	NA	NA
KX004	PD45534ej	HSC	78	F	6018.77	15.15	794.557	0	0	NA	NA
KX004	PD45534ek	HSC	78	F	4878.3	13.52	721.642	4	2	NA	NA
KX004	PD45534el	HSC	78	F	1694.87	13.69	247.607	1	0	NA	NA
KX004	PD45534em	HSC	78	F	7308.98	11.87	1231.5	2	1	NA	NA
KX004	PD45534en	HSC	78	F	3837.95	11.74	653.825	2	0	NA	NA
KX004	PD45534eo	HSC	78	F	3496.72	14.89	469.674	4	0	NA	NA
KX004	PD45534ep	HSC	78	F	3359.81	13.07	514.125	3	0	NA	NA
KX004	PD45534eq	HSC	78	F	2892.05	14.71	393.209	1	0	NA	NA
KX004	PD45534er	HSC	78	F	2736.28	15.83	345.708	3	0	NA	NA
KX004	PD45534es	HSC	78	F	2831.35	13.92	406.803	2	0	NA	NA
KX004	PD45534f	HSC	78	F	2595.97	18.78	276.461	2	0	NA	NA
KX004	PD45534g	HSC	78	F	4412.31	20.47	431.1	2	0	NA	NA
KX004	PD45534gk2	HSC	78	F	3541.61	11.12	636.98	2	0	NA	NA
KX004	PD45534gl2	HSC	78	F	4203.39	10.84	775.533	5	0	NA	NA
KX004	PD45534gm2	HSC	78	F	10609.7	23.58	899.89	3	0	NA	NA
KX004	PD45534gn2	HSC	78	F	10143.3	21.01	965.569	1	0	NA	NA
KX004	PD45534go2	HSC	78	F	9003.36	24.77	726.957	0	0	NA	NA
KX004	PD45534gp2	HSC	78	F	3717.43	11.54	644.269	2	0	NA	NA
KX004	PD45534gq2	HSC	78	F	17563.5	24.45	1436.69	1	0	NA	NA
KX004	PD45534gr2	HSC	78	F	5067.74	13.12	772.521	1	0	NA	NA
KX004	PD45534gs2	HSC	78	F	16249.2	23.09	1407.47	2	0	NA	NA
KX004	PD45534gt2	HSC	78	F	12704.3	23.48	1082.14	4	0	NA	NA
KX004	PD45534gu2	HSC	78	F	9923.15	23.37	849.221	5	0	NA	NA
KX004	PD45534gv2	HSC	78	F	12948.6	26.36	982.443	4	0	NA	NA
KX004	PD45534gw2	HSC	78	F	12060.4	11.49	2099.29	3	0	NA	NA
KX004	PD45534gx2	HSC	78	F	6417.44	13.56	946.525	2	0	NA	NA
KX004	PD45534gy2	HSC	78	F	6909.87	15.57	887.588	3	0	NA	NA
KX004	PD45534gz2	HSC	78	F	9236.35	13.44	1374.46	5	0	NA	NA
KX004	PD45534ha2	HSC	78	F	12290.5	28.74	855.289	0	0	NA	NA
KX004	PD45534hb2	HSC	78	F	8304.93	14.04	1183.04	3	0	NA	NA
KX004	PD45534hc2	HSC	78	F	6078.14	12.12	1002.99	4	0	NA	NA
KX004	PD45534hd2	HSC	78	F	5187.54	14.3	725.53	2	0	NA	NA
KX004	PD45534he2	HSC	78	F	7216.25	14.68	983.14	4	1	NA	NA
KX004	PD45534hf2	HSC	78	F	12668.2	22.99	1102.06	2	0	NA	NA
KX004	PD45534hg2	HSC	78	F	6515.76	13.94	934.829	5	0	NA	NA
KX004	PD45534hh2	HSC	78	F	15876.1	24.92	1274.17	5	0	NA	NA
KX004	PD45534hi2	HSC	78	F	11203	25.34	884.215	1	1	NA	NA
KX004	PD45534hj2	HSC	78	F	8391.09	25.73	652.242	2	0	NA	NA
KX004	PD45534hk2	HSC	78	F	12316.3	23.87	1031.95	4	0	NA	NA
KX004	PD45534hl2	HSC	78	F	14165.4	25.84	1096.39	3	1	NA	NA
KX004	PD45534hm2	HSC	78	F	9227.42	22.9	805.888	3	1	NA	NA
KX004	PD45534hn2	HSC	78	F	4721.12	13.51	698.907	4	0	NA	NA
KX004	PD45534ho2	HSC	78	F	6306.29	13.62	926.034	6	0	NA	NA
KX004	PD45534hq2	HSC	78	F	17191.1	27.19	1264.52	0	0	NA	NA
KX004	PD45534hr2	HSC	78	F	17764.2	22.71	1564.44	1	0	NA	NA
KX004	PD45534hs2	HSC	78	F	18448	22.39	1647.88	3	0	NA	NA
KX004	PD45534ht2	HSC	78	F	14440.2	25.16	1147.87	2	0	NA	NA
KX004	PD45534hu2	HSC	78	F	10599.4	13.31	1592.7	5	0	NA	NA
KX004	PD45534hv2	HSC	78	F	6016.53	13.87	867.56	2	0	NA	NA
KX004	PD45534hx2	HSC	78	F	7648.99	14.14	1081.89	2	0	NA	NA
KX004	PD45534hy2	HSC	78	F	7571.47	11.69	1295.38	2	0	NA	NA
KX004	PD45534hz2	HSC	78	F	7052.79	25.91	544.407	7	0	NA	NA
KX004	PD45534i	HSC	78	F	3653.85	18.09	403.964	3	1	NA	NA
KX004	PD45534ia	HSC	78	F	6158.86	12.47	987.788	3	0	NA	NA
KX004	PD45534ia2	HSC	78	F	8949.13	11.7	1529.77	3	0	NA	NA
KX004	PD45534ib2	HSC	78	F	10944.3	26.15	837.04	2	0	NA	NA
KX004	PD45534ic2	HSC	78	F	13085.9	12.56	2083.74	6	0	NA	NA
KX004	PD45534id2	HSC	78	F	4599.81	14.12	651.531	2	1	NA	NA
KX004	PD45534ie2	HSC	78	F	6198.62	12.34	1004.64	4	0	NA	NA
KX004	PD45534if2	HSC	78	F	6203.75	13.25	936.415	4	2	NA	NA
KX004	PD45534ig2	HSC	78	F	4250.67	15.03	565.625	4	2	NA	NA
KX004	PD45534ih2	HSC	78	F	12099.6	22.32	1084.19	3	0	NA	NA
KX004	PD45534ii2	HSC	78	F	24839.7	24.79	2004.01	2	0	NA	NA
KX004	PD45534ij2	HSC	78	F	14195.4	27.87	1018.69	2	0	NA	NA
KX004	PD45534ik2	HSC	78	F	11235.8	23.86	941.811	4	1	NA	NA
KX004	PD45534il2	HSC	78	F	13907.3	27.2	1022.6	0	0	NA	NA
KX004	PD45534im2	HSC	78	F	6408.6	12.74	1006.06	2	0	NA	NA
KX004	PD45534in2	HSC	78	F	5327.02	14.21	749.757	1	0	NA	NA
KX004	PD45534io2	HSC	78	F	11500.4	25.04	918.562	1	0	NA	NA
KX004	PD45534ip2	HSC	78	F	8509.87	22.03	772.571	8	1	NA	NA
KX004	PD45534iq2	HSC	78	F	7140.79	11.2	1275.14	2	0	NA	NA
KX004	PD45534ir2	HSC	78	F	11926.4	22.28	1070.59	2	0	NA	NA
KX004	PD45534is2	HSC	78	F	6167.92	12.63	976.709	2	0	NA	NA
KX004	PD45534it2	HSC	78	F	5548.64	12.51	887.073	1	0	NA	NA
KX004	PD45534iu2	HSC	78	F	3523.52	12.25	575.269	3	0	NA	NA
KX004	PD45534iv2	HSC	78	F	6905	13.18	1047.8	2	0	NA	NA
KX004	PD45534iw2	HSC	78	F	12019.3	13.24	1815.6	3	0	NA	NA
KX004	PD45534ix2	HSC	78	F	10596.6	11.81	1794.51	4	1	NA	NA
KX004	PD45534iy2	HSC	78	F	6719.93	11.45	1173.79	4	0	NA	NA
KX004	PD45534iz2	HSC	78	F	15901.2	24.05	1322.35	7	0	NA	NA
KX004	PD45534j	HSC	78	F	438.622	19.8	44.3053	4	0	NA	NA
KX004	PD45534ja2	HSC	78	F	5888.07	14.75	798.382	5	0	NA	NA
KX004	PD45534jb2	HSC	78	F	5620.81	12.4	906.582	4	0	NA	NA
KX004	PD45534jc2	HSC	78	F	7514.21	13.25	1134.22	3	0	NA	NA
KX004	PD45534jd2	HSC	78	F	7682.8	14.78	1039.62	4	0	NA	NA
KX004	PD45534je2	HSC	78	F	11267.4	24.59	916.421	2	0	NA	NA
KX004	PD45534jf2	HSC	78	F	8640.13	15	1152.02	5	1	NA	NA
KX004	PD45534jg2	HSC	78	F	9933.28	13.08	1518.85	3	0	NA	NA
KX004	PD45534jh2	HSC	78	F	12781.4	24.49	1043.81	6	1	NA	NA
KX004	PD45534ji2	HSC	78	F	5845.02	11.39	1026.34	2	0	NA	NA
KX004	PD45534jj2	HSC	78	F	7663.41	11.64	1316.74	4	0	NA	NA
KX004	PD45534jk2	HSC	78	F	7330.21	11.67	1256.25	2	0	NA	NA
KX004	PD45534jl2	HSC	78	F	6834.29	11.56	1182.4	1	0	NA	NA
KX004	PD45534jm2	HSC	78	F	8055.23	12.97	1242.13	3	0	NA	NA
KX004	PD45534jn2	HSC	78	F	8297.96	23.79	697.601	5	0	NA	NA
KX004	PD45534jo2	HSC	78	F	19512	26.41	1477.62	7	0	NA	NA
KX004	PD45534jp2	HSC	78	F	10182.2	23.05	883.488	5	0	NA	NA
KX004	PD45534jq2	HSC	78	F	8399.28	14.72	1141.21	3	0	NA	NA
KX004	PD45534jr2	HSC	78	F	7726.77	25.02	617.647	1	1	NA	NA
KX004	PD45534js2	HSC	78	F	4524.8	13.84	653.873	4	0	NA	NA
KX004	PD45534jt2	HSC	78	F	7583.68	15.27	993.278	3	0	NA	NA
KX004	PD45534ju2	HSC	78	F	10449.8	25.02	835.316	10	0	NA	NA
KX004	PD45534jv2	HSC	78	F	7087.44	11.57	1225.14	3	0	NA	NA
KX004	PD45534jw2	HSC	78	F	8743.81	22.89	763.985	3	1	NA	NA
KX004	PD45534jx2	HSC	78	F	3108.68	12.17	510.876	4	1	NA	NA
KX004	PD45534jy2	HSC	78	F	3932.84	12.11	649.519	1	0	NA	NA
KX004	PD45534jz2	HSC	78	F	7097.31	13.53	1049.12	6	0	NA	NA
KX004	PD45534ka2	HSC	78	F	7129.93	13.48	1057.85	2	0	NA	NA
KX004	PD45534kb2	HSC	78	F	2554.57	11.27	453.34	3	0	NA	NA
KX004	PD45534kc2	HSC	78	F	19312.9	15.52	2488.78	7	0	NA	NA
KX004	PD45534kd2	HSC	78	F	9711.65	13.25	1465.91	6	0	NA	NA
KX004	PD45534ke2	HSC	78	F	7364.6	14.31	1029.29	3	0	NA	NA
KX004	PD45534kk2	HSC	78	F	8201.53	15.05	1089.9	1	1	NA	NA
KX004	PD45534kl2	HSC	78	F	5499.41	14.34	767.003	3	0	NA	NA
KX004	PD45534km2	HSC	78	F	9093.93	16.84	1080.04	4	0	NA	NA
KX004	PD45534ks	HSC	78	F	3476.89	9.14	760.807	4	0	NA	NA
KX004	PD45534ks2	HSC	78	F	7243.83	13.29	1090.12	4	0	NA	NA
KX004	PD45534kt2	HSC	78	F	11811.7	23.9	988.427	2	0	NA	NA
KX004	PD45534ku2	HSC	78	F	16510.8	15.22	2169.62	3	0	NA	NA
KX004	PD45534l	HSC	78	F	2599.98	20.17	257.807	1	0	NA	NA
KX004	PD45534la2	HSC	78	F	7605.53	15.26	996.793	3	0	NA	NA
KX004	PD45534lb2	HSC	78	F	7763.43	16.17	960.226	2	0	NA	NA
KX004	PD45534lc2	HSC	78	F	6266	14.95	838.261	3	1	NA	NA
KX004	PD45534li2	HSC	78	F	11408.9	16.67	1368.79	0	0	NA	NA
KX004	PD45534lk2	HSC	78	F	4701.97	14.72	638.855	5	0	NA	NA
KX004	PD45534lq2	HSC	78	F	9883.8	16.07	1230.09	3	1	NA	NA
KX004	PD45534lr2	HSC	78	F	10767.2	17.72	1215.26	3	0	NA	NA
KX004	PD45534ls2	HSC	78	F	11394.5	14.98	1521.3	4	0	NA	NA
KX004	PD45534ly	HSC	78	F	7044.19	9.95	1415.92	2	0	NA	NA
KX004	PD45534lz2	HSC	78	F	8170.4	15.55	1050.86	5	0	NA	NA
KX004	PD45534m	HSC	78	F	4849.7	25.21	384.744	5	0	NA	NA
KX004	PD45534ma2	HSC	78	F	6119.31	16	764.914	3	1	NA	NA
KX004	PD45534mg2	HSC	78	F	14343.6	14.2	2020.23	4	1	NA	NA
KX004	PD45534mh2	HSC	78	F	13282.5	14.61	1818.28	3	0	NA	NA
KX004	PD45534mi2	HSC	78	F	3886.09	12.96	599.705	0	0	NA	NA
KX004	PD45534mk	HSC	78	F	9325.81	14.34	1300.67	0	0	NA	NA
KX004	PD45534mo2	HSC	78	F	13057.1	18.38	1420.79	2	0	NA	NA
KX004	PD45534mp2	HSC	78	F	6241.35	13.24	942.802	2	0	NA	NA
KX004	PD45534mq2	HSC	78	F	7123.81	14.09	1011.19	5	0	NA	NA
KX004	PD45534mx2	HSC	78	F	8010.84	27.37	585.374	0	0	NA	NA
KX004	PD45534my2	HSC	78	F	5724.21	22.69	504.558	5	0	NA	NA
KX004	PD45534ne	HSC	78	F	3091.57	12.71	486.478	3	0	NA	NA
KX004	PD45534nf2	HSC	78	F	10417.7	14.63	1424.16	3	0	NA	NA
KX004	PD45534ng2	HSC	78	F	7659.77	17.54	873.406	4	0	NA	NA
KX004	PD45534nm2	HSC	78	F	6552.14	16.73	783.28	6	2	NA	NA
KX004	PD45534nn2	HSC	78	F	5638.05	13.16	856.847	4	1	NA	NA
KX004	PD45534no2	HSC	78	F	3600.87	12.92	557.41	4	0	NA	NA
KX004	PD45534nu2	HSC	78	F	10345.3	23.4	884.214	6	1	NA	NA
KX004	PD45534nv2	HSC	78	F	9572.83	19.64	974.83	5	0	NA	NA
KX004	PD45534nw2	HSC	78	F	14297.9	29.71	962.497	0	0	NA	NA
KX004	PD45534nx2	HSC	78	F	5730.24	11.58	989.679	3	0	NA	NA
KX004	PD45534ny2	HSC	78	F	1039.54	12.9	161.169	3	0	NA	NA
KX004	PD45534nz2	HSC	78	F	5915.18	25.97	455.539	3	0	NA	NA
KX004	PD45534o	HSC	78	F	1002.99	22.73	88.2525	3	0	NA	NA
KX004	PD45534oa2	HSC	78	F	4944.68	14.86	665.502	3	0	NA	NA
KX004	PD45534ob2	HSC	78	F	3365.41	12.7	529.986	2	0	NA	NA
KX004	PD45534oc2	HSC	78	F	11389.7	29.32	776.924	1	0	NA	NA
KX004	PD45534od	HSC	78	F	2614.99	18.13	288.471	1	0	NA	NA
KX004	PD45534od2	HSC	78	F	1590.35	10.06	316.173	2	0	NA	NA
KX004	PD45534oe2	HSC	78	F	9342.11	21.31	876.782	4	0	NA	NA
KX004	PD45534of2	HSC	78	F	13589.2	30.39	894.321	2	0	NA	NA
KX004	PD45534og2	HSC	78	F	5427.1	12.78	849.311	3	0	NA	NA
KX004	PD45534oh	HSC	78	F	1608.45	16.19	198.697	1	0	NA	NA
KX004	PD45534oi2	HSC	78	F	7225.35	16.02	902.041	1	0	NA	NA
KX004	PD45534oj2	HSC	78	F	11000.6	13.04	1687.21	3	0	NA	NA
KX004	PD45534ok	HSC	78	F	2688.59	15.13	355.399	3	0	NA	NA
KX004	PD45534ol2	HSC	78	F	4284.12	15.45	554.579	0	0	NA	NA
KX004	PD45534om2	HSC	78	F	11576	24.18	957.486	2	0	NA	NA
KX004	PD45534on	HSC	78	F	7550.54	18.01	838.483	1	0	NA	NA
KX004	PD45534oo2	HSC	78	F	11801.7	25.26	934.418	2	0	NA	NA
KX004	PD45534op2	HSC	78	F	7307.93	14.48	1009.38	4	0	NA	NA
KX004	PD45534oq2	HSC	78	F	8150.17	14.61	1115.7	4	1	NA	NA
KX004	PD45534or	HSC	78	F	8460.82	15.51	1091.01	1	0	NA	NA
KX004	PD45534os	HSC	78	F	19163.1	17.37	2206.46	5	2	NA	NA
KX004	PD45534os2	HSC	78	F	4570.96	10.55	866.533	5	2	NA	NA
KX004	PD45534ot2	HSC	78	F	8398.13	15.15	1108.66	4	1	NA	NA
KX004	PD45534ou	HSC	78	F	10101.5	12.5	1616.24	2	0	NA	NA
KX004	PD45534ou2	HSC	78	F	5453.1	10.51	1037.7	2	0	NA	NA
KX004	PD45534ov2	HSC	78	F	6317.33	16.57	762.502	2	0	NA	NA
KX004	PD45534ow2	HSC	78	F	5255.71	13.48	779.779	4	2	NA	NA
KX004	PD45534ox	HSC	78	F	3166.93	14.9	425.091	4	0	NA	NA
KX004	PD45534oy2	HSC	78	F	11444.8	24.21	945.461	2	0	NA	NA
KX004	PD45534oz	HSC	78	F	4763.31	18.26	521.721	4	0	NA	NA
KX004	PD45534oz2	HSC	78	F	3105.51	13.06	475.576	4	0	NA	NA
KX004	PD45534p	HSC	78	F	272.248	20.07	27.1298	0	0	NA	NA
KX004	PD45534pa2	HSC	78	F	11318.7	19.21	1178.42	4	0	NA	NA
KX004	PD45534pb2	HSC	78	F	6820.64	20.37	669.675	4	0	NA	NA
KX004	PD45534pc2	HSC	78	F	4437.7	13.7	647.839	2	1	NA	NA
KX004	PD45534pd2	HSC	78	F	2033.38	13.32	305.312	0	0	NA	NA
KX004	PD45534pe2	HSC	78	F	19382.5	29.48	1314.96	2	0	NA	NA
KX004	PD45534pf2	HSC	78	F	4807.88	11.65	825.387	2	0	NA	NA
KX004	PD45534pg2	HSC	78	F	6692.43	15.42	868.019	2	0	NA	NA
KX004	PD45534ph2	HSC	78	F	17374.1	26.69	1301.92	5	1	NA	NA
KX004	PD45534pi2	HSC	78	F	6800.03	24.92	545.749	3	0	NA	NA
KX004	PD45534pj2	HSC	78	F	8279.77	26.54	623.946	1	0	NA	NA
KX004	PD45534pk2	HSC	78	F	5626.83	14.46	778.261	2	0	NA	NA
KX004	PD45534pl	HSC	78	F	3187.75	17.8	358.174	4	0	NA	NA
KX004	PD45534pm2	HSC	78	F	5296.8	15.4	687.896	2	0	NA	NA
KX004	PD45534pn2	HSC	78	F	6021.99	13.31	904.882	1	0	NA	NA
KX004	PD45534po2	HSC	78	F	6326.5	12.92	979.334	1	0	NA	NA
KX004	PD45534pp2	HSC	78	F	17783.9	24.41	1457.1	3	0	NA	NA
KX004	PD45534pq2	HSC	78	F	7379.43	23.02	641.132	2	0	NA	NA
KX004	PD45534pr2	HSC	78	F	10712.4	31.8	673.736	1	0	NA	NA
KX004	PD45534ps	HSC	78	F	5851.47	10.19	1148.47	2	0	NA	NA
KX004	PD45534pt2	HSC	78	F	4303.07	12.86	669.218	1	1	NA	NA
KX004	PD45534pu2	HSC	78	F	8940.17	26.44	676.261	1	0	NA	NA
KX004	PD45534pv2	HSC	78	F	6162.98	13.71	899.049	2	0	NA	NA
KX004	PD45534pw2	HSC	78	F	4504.36	14.39	626.04	4	0	NA	NA
KX004	PD45534px	HSC	78	F	4960.15	15.71	631.464	2	0	NA	NA
KX004	PD45534py2	HSC	78	F	13402.3	20.2	1326.96	3	0	NA	NA
KX004	PD45534pz2	HSC	78	F	5089.48	11.78	864.088	5	0	NA	NA
KX004	PD45534q	HSC	78	F	2624.62	14.21	369.405	5	0	NA	NA
KX004	PD45534qa2	HSC	78	F	13471.5	29.93	900.2	4	1	NA	NA
KX004	PD45534qb2	HSC	78	F	14639.9	24.31	1204.43	3	1	NA	NA
KX004	PD45534qc2	HSC	78	F	7336.72	28.68	511.626	4	1	NA	NA
KX004	PD45534qd2	HSC	78	F	1585.58	12.38	256.152	5	1	NA	NA
KX004	PD45534qe	HSC	78	F	6672.63	14.99	890.278	0	0	NA	NA
KX004	PD45534qe2	HSC	78	F	6215.49	12.86	966.639	0	0	NA	NA
KX004	PD45534qf2	HSC	78	F	7711.86	22.2	694.762	5	0	NA	NA
KX004	PD45534qg2	HSC	78	F	8260	22.36	738.819	4	2	NA	NA
KX004	PD45534qh2	HSC	78	F	10960.7	13.74	1595.44	6	2	NA	NA
KX004	PD45534qi2	HSC	78	F	4273.61	14.87	574.796	3	0	NA	NA
KX004	PD45534qj2	HSC	78	F	2069.87	13.65	303.278	3	0	NA	NA
KX004	PD45534qk2	HSC	78	F	3724.65	14.27	522.025	6	3	NA	NA
KX004	PD45534ql	HSC	78	F	2700.16	18.8	287.251	2	0	NA	NA
KX004	PD45534qm2	HSC	78	F	4059.25	13.89	584.485	4	0	NA	NA
KX004	PD45534qn2	HSC	78	F	7701.95	25.65	600.542	3	0	NA	NA
KX004	PD45534qo2	HSC	78	F	7188.22	24.19	594.313	6	2	NA	NA
KX004	PD45534qp2	HSC	78	F	3268.49	11.35	575.945	4	0	NA	NA
KX004	PD45534qq2	HSC	78	F	5744.31	12.96	886.468	2	1	NA	NA
KX004	PD45534qr2	HSC	78	F	6405.91	12.5	1024.95	2	0	NA	NA
KX004	PD45534qs2	HSC	78	F	5593.46	21.93	510.119	6	1	NA	NA
KX004	PD45534qt	HSC	78	F	11091	12.49	1775.98	2	0	NA	NA
KX004	PD45534qt2	HSC	78	F	6269.88	14.25	879.983	2	0	NA	NA
KX004	PD45534qu2	HSC	78	F	10674.9	26.16	816.124	6	0	NA	NA
KX004	PD45534qv2	HSC	78	F	5369.23	21.27	504.864	5	3	NA	NA
KX004	PD45534qw2	HSC	78	F	4236.03	15.1	561.064	0	0	NA	NA
KX004	PD45534qx2	HSC	78	F	8654.29	13.63	1269.89	2	0	NA	NA
KX004	PD45534qy2	HSC	78	F	2681.61	14.07	381.181	0	0	NA	NA
KX004	PD45534qz	HSC	78	F	7348.54	10.51	1398.39	1	0	NA	NA
KX004	PD45534qz2	HSC	78	F	6770.83	13.41	1009.82	1	0	NA	NA
KX004	PD45534ra2	HSC	78	F	7691.53	25.54	602.312	0	0	NA	NA
KX004	PD45534rb2	HSC	78	F	9149.45	20.09	910.846	0	0	NA	NA
KX004	PD45534rc2	HSC	78	F	8323.11	13.65	1219.5	5	0	NA	NA
KX004	PD45534rd2	HSC	78	F	2706.06	13.52	400.305	2	0	NA	NA
KX004	PD45534re2	HSC	78	F	8154.71	29.36	555.498	2	0	NA	NA
KX004	PD45534rf2	HSC	78	F	6580.87	14.03	938.114	7	1	NA	NA
KX004	PD45534rg	HSC	78	F	5206.42	26.05	399.725	4	1	NA	NA
KX004	PD45534rg2	HSC	78	F	6186.26	9.09	1361.11	6	1	NA	NA
KX004	PD45534rh2	HSC	78	F	11972.9	21.64	1106.55	4	0	NA	NA
KX004	PD45534rn	HSC	78	F	2848	19.02	299.474	3	0	NA	NA
KX004	PD45534ro2	HSC	78	F	12382.6	20.34	1217.56	5	0	NA	NA
KX004	PD45534rp2	HSC	78	F	5937.76	19.71	602.512	3	1	NA	NA
KX004	PD45534rq	HSC	78	F	4896.31	19.41	504.514	5	0	NA	NA
KX004	PD45534rw2	HSC	78	F	12162.3	21.87	1112.24	2	0	NA	NA
KX004	PD45534rx2	HSC	78	F	6956.31	19.78	703.368	4	0	NA	NA
KX004	PD45534ry	HSC	78	F	2402.95	20.51	234.32	3	0	NA	NA
KX004	PD45534sa	HSC	78	F	6596	21.09	625.51	3	1	NA	NA
KX004	PD45534sf2	HSC	78	F	8297.51	21.63	767.222	1	0	NA	NA
KX004	PD45534sk	HSC	78	F	1926.12	18.77	205.234	0	0	NA	NA
KX004	PD45534sl	HSC	78	F	8544.48	25.63	666.756	4	0	NA	NA
KX004	PD45534sn2	HSC	78	F	6784.41	18.59	729.899	4	0	NA	NA
KX004	PD45534su	HSC	78	F	4043.56	16.07	503.243	2	0	NA	NA
KX004	PD45534sv2	HSC	78	F	7781.8	22.73	684.716	2	0	NA	NA
KX004	PD45534t	HSC	78	F	1713.85	12.96	264.483	2	1	NA	NA
KX004	PD45534ta2	HSC	78	F	3286.16	11.38	577.533	1	0	NA	NA
KX004	PD45534tc2	HSC	78	F	7679.29	25.5	602.297	5	1	NA	NA
KX004	PD45534te	HSC	78	F	1303.9	15	173.853	1	0	NA	NA
KX004	PD45534tk	HSC	78	F	3067.1	18.97	323.363	3	2	NA	NA
KX004	PD45534tk2	HSC	78	F	2078.05	12.84	323.684	2	2	NA	NA
KX004	PD45534ts	HSC	78	F	11583.5	17.94	1291.36	3	1	NA	NA
KX004	PD45534ts2	HSC	78	F	4152.71	9.73	853.589	3	1	NA	NA
KX004	PD45534tt	HSC	78	F	3074.44	17.74	346.611	3	0	NA	NA
KX004	PD45534tt2	HSC	78	F	1239.99	8.28	299.514	3	0	NA	NA
KX004	PD45534tu	HSC	78	F	7083.17	17.58	805.821	1	0	NA	NA
KX004	PD45534tv	HSC	78	F	8169.96	14.22	1149.08	4	0	NA	NA
KX004	PD45534u	HSC	78	F	6521.64	15.68	831.842	1	0	NA	NA
KX004	PD45534ua2	HSC	78	F	12429.5	20.39	1219.18	2	1	NA	NA
KX004	PD45534ug	HSC	78	F	5283.91	20.97	503.949	0	0	NA	NA
KX004	PD45534ui	HSC	78	F	3565.56	17.64	404.259	3	0	NA	NA
KX004	PD45534uo	HSC	78	F	4850.68	19.49	497.761	4	1	NA	NA
KX004	PD45534uo2	HSC	78	F	1968.04	8.09	486.536	4	1	NA	NA
KX004	PD45534uq2	HSC	78	F	19642.8	21.05	1866.3	4	1	NA	NA
KX004	PD45534us	HSC	78	F	2973.52	20.28	293.247	1	0	NA	NA
KX004	PD45534uy	HSC	78	F	6418.01	14.59	879.782	2	0	NA	NA
KX004	PD45534uz	HSC	78	F	4198.02	12.87	652.373	1	1	NA	NA
KX004	PD45534va	HSC	78	F	2981.73	10.64	560.476	4	1	NA	NA
KX004	PD45534vb	HSC	78	F	6038.92	11.47	1052.99	0	0	NA	NA
KX004	PD45534vc	HSC	78	F	18540.9	12.51	2964.17	7	1	NA	NA
KX004	PD45534vd	HSC	78	F	3962.19	12.81	618.609	2	0	NA	NA
KX004	PD45534ve	HSC	78	F	4420.71	12.33	717.066	1	0	NA	NA
KX004	PD45534vf	HSC	78	F	3554.88	12.37	574.758	4	0	NA	NA
KX004	PD45534vg	HSC	78	F	2729.39	11.99	455.278	1	0	NA	NA
KX004	PD45534vh	HSC	78	F	2432.31	14.41	337.586	4	1	NA	NA
KX004	PD45534vi	HSC	78	F	4168.16	10.65	782.753	2	0	NA	NA
KX004	PD45534vl	HSC	78	F	3867.49	12.84	602.413	4	0	NA	NA
KX004	PD45534vn	HSC	78	F	2882.03	13.4	430.154	3	1	NA	NA
KX004	PD45534vp	HSC	78	F	8132.97	11.03	1474.7	2	1	NA	NA
KX004	PD45534vq	HSC	78	F	8546.17	11.84	1443.61	3	0	NA	NA
KX004	PD45534vr	HSC	78	F	2802.59	14.01	400.084	0	0	NA	NA
KX004	PD45534vs	HSC	78	F	4027.78	13.28	606.593	0	0	NA	NA
KX004	PD45534vt	HSC	78	F	3096.97	11.27	549.595	0	0	NA	NA
KX004	PD45534vv	HSC	78	F	2400.17	15.21	315.604	3	0	NA	NA
KX004	PD45534vw	HSC	78	F	4697.05	13.34	704.205	3	0	NA	NA
KX004	PD45534vx	HSC	78	F	7477.75	11.25	1329.38	4	0	NA	NA
KX004	PD45534vy	HSC	78	F	4448.39	12.58	707.216	6	0	NA	NA
KX004	PD45534vz	HSC	78	F	3879.36	12.1	641.217	4	0	NA	NA
KX004	PD45534w	HSC	78	F	327.076	12.06	54.2415	6	2	NA	NA
KX004	PD45534wa	HSC	78	F	3996.32	11.86	673.916	3	0	NA	NA
KX004	PD45534wb	HSC	78	F	3138.95	11.51	545.43	4	2	NA	NA
KX004	PD45534wc	HSC	78	F	1923.75	12.6	305.357	3	0	NA	NA
KX004	PD45534wd	HSC	78	F	3006.48	11.65	516.134	4	1	NA	NA
KX004	PD45534we	HSC	78	F	18640.3	10.11	3687.5	1	0	NA	NA
KX004	PD45534wf	HSC	78	F	2268.1	14.24	318.553	6	2	NA	NA
KX004	PD45534wg	HSC	78	F	3821.25	14.7	519.898	5	0	NA	NA
KX004	PD45534wh	HSC	78	F	5295.7	11.83	895.3	1	0	NA	NA
KX004	PD45534wi	HSC	78	F	5822.16	14.42	807.512	3	1	NA	NA
KX004	PD45534wk	HSC	78	F	20978.3	12.26	3422.23	3	0	NA	NA
KX004	PD45534wl	HSC	78	F	3017.52	11.98	503.76	5	1	NA	NA
KX004	PD45534wm	HSC	78	F	3592.29	12.45	577.075	5	1	NA	NA
KX004	PD45534wn	HSC	78	F	3037.92	11.32	536.735	2	0	NA	NA
KX004	PD45534wo	HSC	78	F	6373.32	12.6	1011.64	3	0	NA	NA
KX004	PD45534wp	HSC	78	F	2762.13	12.26	450.592	3	1	NA	NA
KX004	PD45534wq	HSC	78	F	4822.51	13.62	708.151	5	0	NA	NA
KX004	PD45534wr	HSC	78	F	5162.94	10.37	995.745	1	0	NA	NA
KX004	PD45534ws	HSC	78	F	10813	11.24	1924.02	2	0	NA	NA
KX004	PD45534wt	HSC	78	F	8767.28	15.33	1143.81	5	0	NA	NA
KX004	PD45534wu	HSC	78	F	5206.55	13.88	750.223	1	0	NA	NA
KX004	PD45534wv	HSC	78	F	6543.55	10.07	1299.61	5	2	NA	NA
KX004	PD45534ww	HSC	78	F	6554.7	10.85	1208.24	2	0	NA	NA
KX004	PD45534wx	HSC	78	F	4478.38	11.96	748.893	3	0	NA	NA
KX004	PD45534wy	HSC	78	F	7734.21	11.64	1328.9	3	0	NA	NA
KX004	PD45534wz	HSC	78	F	4639.29	13.72	676.281	2	0	NA	NA
KX004	PD45534x	HSC	78	F	1820.92	12.57	289.725	4	0	NA	NA
KX004	PD45534xa	HSC	78	F	3398.51	13.88	489.699	5	0	NA	NA
KX004	PD45534xb	HSC	78	F	3259.16	12.78	510.041	3	1	NA	NA
KX004	PD45534xc	HSC	78	F	5606.01	11.54	971.579	3	0	NA	NA
KX004	PD45534xd	HSC	78	F	6063.04	12.22	992.314	5	0	NA	NA
KX004	PD45534xe	HSC	78	F	5105.95	11.88	859.588	1	0	NA	NA
KX004	PD45534xf	HSC	78	F	3851.4	13.23	582.222	1	1	NA	NA
KX004	PD45534xi	HSC	78	F	3799.97	13.57	560.055	7	0	NA	NA
KX004	PD45534xj	HSC	78	F	2390.26	13.38	357.288	0	0	NA	NA
KX004	PD45534xk	HSC	78	F	5548.56	12.16	912.592	3	0	NA	NA
KX004	PD45534xn	HSC	78	F	3616.17	12.78	565.911	1	0	NA	NA
KX004	PD45534xo	HSC	78	F	5266.26	10.97	960.12	2	1	NA	NA
KX004	PD45534xr	HSC	78	F	2098.91	13.67	307.083	1	0	NA	NA
KX004	PD45534xv	HSC	78	F	4332.19	12.92	670.618	9	0	NA	NA
KX004	PD45534xw	HSC	78	F	5100.8	13.67	746.277	4	0	NA	NA
KX004	PD45534xx	HSC	78	F	11628	12.55	1853.07	1	0	NA	NA
KX004	PD45534xy	HSC	78	F	4716.4	14.17	665.688	2	2	NA	NA
KX004	PD45534xz	HSC	78	F	21019.7	12.66	3320.65	2	0	NA	NA
KX004	PD45534y	HSC	78	F	3663.12	12.33	594.18	4	0	NA	NA
KX004	PD45534ya	HSC	78	F	2728.96	11.31	482.575	3	0	NA	NA
KX004	PD45534yb	HSC	78	F	5823.44	11.42	1019.87	0	0	NA	NA
KX004	PD45534yd	HSC	78	F	1532.37	13.27	230.953	3	0	NA	NA
KX004	PD45534ye	HSC	78	F	7803.91	13.25	1177.95	1	0	NA	NA
KX004	PD45534yf	HSC	78	F	969.841	10.7	181.279	3	1	NA	NA
KX004	PD45534yg	HSC	78	F	2558.19	13.03	392.662	1	0	NA	NA
KX004	PD45534yh	HSC	78	F	4950.52	14.61	677.689	4	0	NA	NA
KX004	PD45534yj	HSC	78	F	2748.39	11.36	483.871	3	0	NA	NA
KX004	PD45534yk	HSC	78	F	4644.49	13.04	712.345	2	0	NA	NA
KX004	PD45534yl	HSC	78	F	1373.24	12.28	223.655	3	0	NA	NA
KX004	PD45534ym	HSC	78	F	4890.93	14.01	698.206	4	2	NA	NA
KX004	PD45534yo	HSC	78	F	2680.17	13.57	395.014	1	1	NA	NA
KX004	PD45534z	HSC	78	F	2958.7	15.51	381.522	4	0	NA	NA
KX008	PD48402b_lo0001	HSC	76	F	4270.79	15.63	546.486	1	0	NA	NA
KX008	PD48402b_lo0002	HSC	76	F	3730.08	16.62	448.866	1	0	NA	NA
KX008	PD48402b_lo0003	HSC	76	F	4802.44	18.64	515.283	2	1	NA	NA
KX008	PD48402b_lo0005	HSC	76	F	5090.17	19.76	515.199	3	0	NA	NA
KX008	PD48402b_lo0006	HSC	76	F	3392.1	17.64	384.592	5	0	NA	NA
KX008	PD48402b_lo0007	HSC	76	F	4293.01	17.95	478.33	1	0	NA	NA
KX008	PD48402b_lo0008	HSC	76	F	4735.62	18.75	505.133	1	0	NA	NA
KX008	PD48402b_lo0009	HSC	76	F	4643.5	18.74	495.571	5	0	NA	NA
KX008	PD48402b_lo0010	HSC	76	F	9376.06	36.01	520.748	2	0	NA	NA
KX008	PD48402b_lo0011	HSC	76	F	3655.62	19.01	384.6	1	1	NA	NA
KX008	PD48402b_lo0012	HSC	76	F	4084.69	13.03	626.967	5	0	NA	NA
KX008	PD48402b_lo0013	HSC	76	F	2360.47	12.5	377.675	3	1	NA	NA
KX008	PD48402b_lo0014	HSC	76	F	3375.37	12.09	558.374	2	0	NA	NA
KX008	PD48402b_lo0015	HSC	76	F	2927.43	12.51	468.014	2	0	NA	NA
KX008	PD48402b_lo0016	HSC	76	F	4811.97	12.57	765.628	3	0	NA	NA
KX008	PD48402b_lo0017	HSC	76	F	3501.62	13.21	530.147	2	0	NA	NA
KX008	PD48402b_lo0018	HSC	76	F	2875.74	12.53	459.017	5	1	NA	NA
KX008	PD48402b_lo0019	HSC	76	F	3493.13	13.45	519.425	2	0	NA	NA
KX008	PD48402b_lo0020	HSC	76	F	4606.79	20.01	460.449	3	0	NA	NA
KX008	PD48402b_lo0021	HSC	76	F	2743.99	15.18	361.527	4	0	NA	NA
KX008	PD48402b_lo0022	HSC	76	F	4240.53	12.13	699.181	6	0	NA	NA
KX008	PD48402b_lo0023	HSC	76	F	3832.59	14.26	537.53	4	2	NA	NA
KX008	PD48402b_lo0024	HSC	76	F	4287.22	12.44	689.264	1	0	NA	NA
KX008	PD48402b_lo0025	HSC	76	F	3637.79	11.83	615.011	3	2	NA	NA
KX008	PD48402b_lo0026	HSC	76	F	4184.97	13.93	600.857	4	0	NA	NA
KX008	PD48402b_lo0027	HSC	76	F	3261.41	12.46	523.501	2	0	NA	NA
KX008	PD48402b_lo0029	HSC	76	F	3382.96	13.72	493.143	1	0	NA	NA
KX008	PD48402b_lo0030	HSC	76	F	4595.75	13.73	669.446	1	0	NA	NA
KX008	PD48402b_lo0031	HSC	76	F	3604.01	12.19	591.306	0	0	NA	NA
KX008	PD48402b_lo0032	HSC	76	F	3692.82	12.73	580.176	1	0	NA	NA
KX008	PD48402b_lo0033	HSC	76	F	3908.47	12.94	604.091	3	0	NA	NA
KX008	PD48402b_lo0034	HSC	76	F	2803.93	11.08	506.125	0	0	NA	NA
KX008	PD48402b_lo0035	HSC	76	F	3188.18	11.08	575.484	5	0	NA	NA
KX008	PD48402b_lo0036	HSC	76	F	675.737	11.36	118.968	0	0	NA	NA
KX008	PD48402b_lo0037	HSC	76	F	3204.43	13.93	460.076	1	0	NA	NA
KX008	PD48402b_lo0038	HSC	76	F	5009.75	15.11	663.104	3	1	NA	NA
KX008	PD48402b_lo0039	HSC	76	F	4720.25	10.73	879.823	1	0	NA	NA
KX008	PD48402b_lo0040	HSC	76	F	3109.17	12.8	485.808	3	0	NA	NA
KX008	PD48402b_lo0041	HSC	76	F	3583.32	11.4	628.653	2	0	NA	NA
KX008	PD48402b_lo0042	HSC	76	F	3836.74	14.5	529.206	0	0	NA	NA
KX008	PD48402b_lo0043	HSC	76	F	9500.31	35.34	537.652	0	0	NA	NA
KX008	PD48402b_lo0044	HSC	76	F	3786.6	11.72	646.177	3	0	NA	NA
KX008	PD48402b_lo0045	HSC	76	F	3226.8	13.6	474.529	4	0	NA	NA
KX008	PD48402b_lo0046	HSC	76	F	4771.79	12.85	742.691	3	0	NA	NA
KX008	PD48402b_lo0047	HSC	76	F	4259.48	10.82	787.335	7	1	NA	NA
KX008	PD48402b_lo0048	HSC	76	F	3451.99	11.44	603.495	2	0	NA	NA
KX008	PD48402b_lo0049	HSC	76	F	3410.99	12.67	538.436	5	0	NA	NA
KX008	PD48402b_lo0050	HSC	76	F	3403.23	12.06	564.383	3	1	NA	NA
KX008	PD48402b_lo0051	HSC	76	F	3712.74	13.25	560.414	2	0	NA	NA
KX008	PD48402b_lo0052	HSC	76	F	4377.09	14.4	607.929	3	0	NA	NA
KX008	PD48402b_lo0053	HSC	76	F	7803.62	28.08	555.813	2	0	NA	NA
KX008	PD48402b_lo0054	HSC	76	F	10376.7	35.73	580.84	2	0	NA	NA
KX008	PD48402b_lo0055	HSC	76	F	3148.55	12.28	512.793	2	0	NA	NA
KX008	PD48402b_lo0056	HSC	76	F	4077.2	13.62	598.708	2	0	NA	NA
KX008	PD48402b_lo0057	HSC	76	F	2642.4	12.78	413.521	1	0	NA	NA
KX008	PD48402b_lo0058	HSC	76	F	5222.52	9.62	1085.76	3	0	NA	NA
KX008	PD48402b_lo0059	HSC	76	F	2568.02	11.4	450.53	1	0	NA	NA
KX008	PD48402b_lo0060	HSC	76	F	8505.5	20.67	822.98	5	0	NA	NA
KX008	PD48402b_lo0061	HSC	76	F	2912.49	14.2	410.21	4	0	NA	NA
KX008	PD48402b_lo0062	HSC	76	F	3648.99	9.36	779.699	6	2	NA	NA
KX008	PD48402b_lo0063	HSC	76	F	9284.02	26.7	695.432	1	0	NA	NA
KX008	PD48402b_lo0064	HSC	76	F	4013.72	10.91	735.787	3	0	NA	NA
KX008	PD48402b_lo0065	HSC	76	F	4689.53	13.96	671.852	1	0	NA	NA
KX008	PD48402b_lo0066	HSC	76	F	3006.24	10.41	577.568	2	0	NA	NA
KX008	PD48402b_lo0067	HSC	76	F	10719.3	23.23	922.884	4	2	NA	NA
KX008	PD48402b_lo0068	HSC	76	F	4504.76	11.64	774.014	1	0	NA	NA
KX008	PD48402b_lo0069	HSC	76	F	4345.43	14.56	596.9	3	0	NA	NA
KX008	PD48402b_lo0070	HSC	76	F	6416.3	27.06	474.228	5	0	NA	NA
KX008	PD48402b_lo0071	HSC	76	F	3496.11	11.92	586.596	4	0	NA	NA
KX008	PD48402b_lo0072	HSC	76	F	3018.03	12.29	491.136	2	2	NA	NA
KX008	PD48402b_lo0073	HSC	76	F	3537.7	11.87	596.074	4	0	NA	NA
KX008	PD48402b_lo0074	HSC	76	F	6072.82	13.96	870.032	1	0	NA	NA
KX008	PD48402b_lo0075	HSC	76	F	2732.18	12.45	438.904	3	0	NA	NA
KX008	PD48402b_lo0076	HSC	76	F	2513.69	11.21	448.473	3	0	NA	NA
KX008	PD48402b_lo0077	HSC	76	F	4672.97	12.98	720.026	1	1	NA	NA
KX008	PD48402b_lo0078	HSC	76	F	4227.34	12.42	680.731	2	0	NA	NA
KX008	PD48402b_lo0079	HSC	76	F	5059.7	13.27	762.577	1	0	NA	NA
KX008	PD48402b_lo0080	HSC	76	F	3555.03	9.15	777.056	2	0	NA	NA
KX008	PD48402b_lo0081	HSC	76	F	2782.64	10.95	508.245	2	0	NA	NA
KX008	PD48402b_lo0083	HSC	76	F	2755.85	13.01	423.651	0	0	NA	NA
KX008	PD48402b_lo0084	HSC	76	F	4257.1	9.95	855.698	5	0	NA	NA
KX008	PD48402b_lo0085	HSC	76	F	7114.29	15.08	943.54	0	0	NA	NA
KX008	PD48402b_lo0086	HSC	76	F	4341.84	13.35	650.463	2	0	NA	NA
KX008	PD48402b_lo0087	HSC	76	F	4239.26	14.26	594.567	2	1	NA	NA
KX008	PD48402b_lo0088	HSC	76	F	4447.23	15.74	565.086	2	0	NA	NA
KX008	PD48402b_lo0089	HSC	76	F	3703.7	12.02	616.256	5	0	NA	NA
KX008	PD48402b_lo0090	HSC	76	F	3048.13	10.78	565.516	5	1	NA	NA
KX008	PD48402b_lo0091	HSC	76	F	3057.94	9.73	628.559	3	0	NA	NA
KX008	PD48402b_lo0092	HSC	76	F	2785.64	11.28	493.908	0	0	NA	NA
KX008	PD48402b_lo0093	HSC	76	F	3545.42	14.62	485.01	5	0	NA	NA
KX008	PD48402b_lo0094	HSC	76	F	4068.84	11.19	727.228	5	1	NA	NA
KX008	PD48402b_lo0095	HSC	76	F	5437.72	13.13	828.289	3	0	NA	NA
KX008	PD48402b_lo0096	HSC	76	F	6123.82	10.01	1223.54	0	0	NA	NA
KX008	PD48402b_lo0097	HSC	76	F	5734.68	12.53	915.352	2	2	NA	NA
KX008	PD48402b_lo0098	HSC	76	F	2254.77	11.15	404.443	2	0	NA	NA
KX008	PD48402b_lo0099	HSC	76	F	3409.49	11.43	596.586	3	0	NA	NA
KX008	PD48402b_lo0100	HSC	76	F	2470.13	11.35	435.265	2	0	NA	NA
KX008	PD48402b_lo0101	HSC	76	F	3131.65	12.82	488.557	5	0	NA	NA
KX008	PD48402b_lo0104	HSC	76	F	2944.78	11.89	495.337	4	0	NA	NA
KX008	PD48402b_lo0105	HSC	76	F	3467.42	11.52	601.983	2	0	NA	NA
KX008	PD48402b_lo0106	HSC	76	F	3751.95	12.43	603.693	4	0	NA	NA
KX008	PD48402b_lo0107	HSC	76	F	4064.96	14.21	572.127	0	0	NA	NA
KX008	PD48402b_lo0108	HSC	76	F	4674.4	12.13	770.717	1	1	NA	NA
KX008	PD48402b_lo0111	HSC	76	F	4504.2	15.7	573.783	3	0	NA	NA
KX008	PD48402b_lo0112	HSC	76	F	5818.68	13.47	863.947	3	0	NA	NA
KX008	PD48402b_lo0113	HSC	76	F	4361.41	13.77	633.466	4	0	NA	NA
KX008	PD48402b_lo0114	HSC	76	F	5620.71	15.21	739.081	2	0	NA	NA
KX008	PD48402b_lo0118	HSC	76	F	3994.45	11.59	689.292	6	0	NA	NA
KX008	PD48402b_lo0119	HSC	76	F	3132.42	13.27	472.106	3	1	NA	NA
KX008	PD48402b_lo0120	HSC	76	F	3555.61	12.35	575.807	2	0	NA	NA
KX008	PD48402b_lo0121	HSC	76	F	5354.61	13.92	769.341	4	1	NA	NA
KX008	PD48402b_lo0125	HSC	76	F	5459.13	14.12	773.248	4	0	NA	NA
KX008	PD48402b_lo0126	HSC	76	F	2579.51	11.48	449.392	3	0	NA	NA
KX008	PD48402b_lo0127	HSC	76	F	5800.54	12.63	918.534	4	0	NA	NA
KX008	PD48402b_lo0128	HSC	76	F	4513.42	14.46	624.263	2	0	NA	NA
KX008	PD48402b_lo0132	HSC	76	F	6366.8	12.77	997.15	2	0	NA	NA
KX008	PD48402b_lo0133	HSC	76	F	4898.89	15.17	645.866	2	0	NA	NA
KX008	PD48402b_lo0134	HSC	76	F	4217.34	14.92	565.327	6	1	NA	NA
KX008	PD48402b_lo0135	HSC	76	F	4592.23	14.26	644.072	2	1	NA	NA
KX008	PD48402b_lo0139	HSC	76	F	7434.22	14.79	1005.3	4	0	NA	NA
KX008	PD48402b_lo0140	HSC	76	F	3789.08	12.49	606.738	5	0	NA	NA
KX008	PD48402b_lo0141	HSC	76	F	5167.7	12.99	795.643	6	0	NA	NA
KX008	PD48402b_lo0142	HSC	76	F	4686.02	16.1	582.114	1	0	NA	NA
KX008	PD48402b_lo0146	HSC	76	F	3712.06	12.45	596.315	3	0	NA	NA
KX008	PD48402b_lo0147	HSC	76	F	5716.92	12.06	948.08	2	0	NA	NA
KX008	PD48402b_lo0148	HSC	76	F	2666.98	11.31	471.615	2	0	NA	NA
KX008	PD48402b_lo0149	HSC	76	F	3531.03	11.18	631.669	4	1	NA	NA
KX008	PD48402b_lo0153	HSC	76	F	8765.81	14.49	1209.91	3	0	NA	NA
KX008	PD48402b_lo0154	HSC	76	F	5407.74	12.17	888.7	3	0	NA	NA
KX008	PD48402b_lo0155	HSC	76	F	5580.22	11.89	938.641	5	0	NA	NA
KX008	PD48402b_lo0156	HSC	76	F	4610.93	13.68	674.113	2	0	NA	NA
KX008	PD48402b_lo0160	HSC	76	F	4165.21	11.34	734.605	4	0	NA	NA
KX008	PD48402b_lo0161	HSC	76	F	4892.8	15.92	614.673	3	0	NA	NA
KX008	PD48402b_lo0162	HSC	76	F	3345.73	12.63	529.807	6	0	NA	NA
KX008	PD48402b_lo0163	HSC	76	F	4818.81	13.7	703.476	3	0	NA	NA
KX008	PD48402b_lo0166	HSC	76	F	6381.12	13.49	946.052	2	1	NA	NA
KX008	PD48402b_lo0167	HSC	76	F	3599.25	11.54	623.787	3	0	NA	NA
KX008	PD48402b_lo0168	HSC	76	F	3335.35	15.37	434.008	1	0	NA	NA
KX008	PD48402b_lo0169	HSC	76	F	5281.95	11.66	905.995	6	1	NA	NA
KX008	PD48402b_lo0172	HSC	76	F	6859.8	13.49	1017.02	6	0	NA	NA
KX008	PD48402b_lo0173	HSC	76	F	3147.61	12.47	504.829	2	0	NA	NA
KX008	PD48402b_lo0174	HSC	76	F	3517.12	13.07	538.197	3	0	NA	NA
KX008	PD48402b_lo0175	HSC	76	F	4054.55	12.58	644.603	3	0	NA	NA
KX008	PD48402b_lo0178	HSC	76	F	1447.25	12.36	234.183	4	0	NA	NA
KX008	PD48402b_lo0179	HSC	76	F	4346.89	12.04	722.075	3	0	NA	NA
KX008	PD48402b_lo0180	HSC	76	F	2999.39	11.53	520.276	3	0	NA	NA
KX008	PD48402b_lo0181	HSC	76	F	2117.57	10.08	420.153	3	1	NA	NA
KX008	PD48402b_lo0182	HSC	76	F	4381.48	13.12	667.909	2	0	NA	NA
KX008	PD48402b_lo0183	HSC	76	F	4203.93	12.04	698.327	3	0	NA	NA
KX008	PD48402b_lo0184	HSC	76	F	5610.03	13.02	861.756	1	0	NA	NA
KX008	PD48402b_lo0185	HSC	76	F	6429.52	10.25	1254.54	2	0	NA	NA
KX008	PD48402b_lo0186	HSC	76	F	2981.04	11.95	498.919	6	1	NA	NA
KX008	PD48402b_lo0187	HSC	76	F	2178.45	13.33	326.849	2	0	NA	NA
KX008	PD48402b_lo0188	HSC	76	F	2480.32	11.52	430.611	2	0	NA	NA
KX008	PD48402b_lo0189	HSC	76	F	3276.87	10.44	627.753	4	0	NA	NA
KX008	PD48402b_lo0190	HSC	76	F	3348.39	14.43	464.087	5	0	NA	NA
KX008	PD48402b_lo0191	HSC	76	F	3054.91	15.26	400.381	1	0	NA	NA
KX008	PD48402b_lo0192	HSC	76	F	4414.93	14.59	605.199	3	0	NA	NA
KX008	PD48402b_lo0193	HSC	76	F	2131.01	11.16	381.901	0	0	NA	NA
KX008	PD48402b_lo0194	HSC	76	F	3335.83	14.3	466.55	3	0	NA	NA
KX008	PD48402b_lo0195	HSC	76	F	3745.49	11.89	630.024	1	1	NA	NA
KX008	PD48402b_lo0196	HSC	76	F	3738.36	11.08	674.794	5	2	NA	NA
KX008	PD48402b_lo0197	HSC	76	F	3838.9	14.96	513.222	7	0	NA	NA
KX008	PD48402b_lo0198	HSC	76	F	4957.31	15.79	627.905	3	0	NA	NA
KX008	PD48402b_lo0199	HSC	76	F	3553.27	13.7	518.726	2	0	NA	NA
KX008	PD48402b_lo0200	HSC	76	F	4146.63	14.95	554.733	3	0	NA	NA
KX008	PD48402b_lo0201	HSC	76	F	4575.88	11.65	785.559	4	0	NA	NA
KX008	PD48402b_lo0202	HSC	76	F	3521.72	12.65	556.794	2	1	NA	NA
KX008	PD48402b_lo0203	HSC	76	F	2953.45	12.64	467.318	4	0	NA	NA
KX008	PD48402b_lo0204	HSC	76	F	1893.09	12.71	297.89	1	0	NA	NA
KX008	PD48402b_lo0205	HSC	76	F	3123.07	13.73	454.926	0	0	NA	NA
KX008	PD48402b_lo0206	HSC	76	F	2308.63	13.76	335.557	4	0	NA	NA
KX008	PD48402b_lo0207	HSC	76	F	3145.75	14.24	441.819	5	1	NA	NA
KX008	PD48402b_lo0208	HSC	76	F	2337.24	12.03	388.569	1	0	NA	NA
KX008	PD48402b_lo0209	HSC	76	F	2930.78	12.26	478.104	1	0	NA	NA
KX008	PD48402b_lo0210	HSC	76	F	3003.34	13.38	448.93	2	1	NA	NA
KX008	PD48402b_lo0211	HSC	76	F	3131.37	11.99	522.33	1	0	NA	NA
KX008	PD48402b_lo0212	HSC	76	F	5972.86	13.08	913.281	0	0	NA	NA
KX008	PD48402b_lo0213	HSC	76	F	3857.14	11.87	649.897	3	1	NA	NA
KX008	PD48402b_lo0214	HSC	76	F	4288.89	14.89	576.077	3	0	NA	NA
KX008	PD48402b_lo0215	HSC	76	F	3174.67	16.3	389.53	5	0	NA	NA
KX008	PD48402b_lo0216	HSC	76	F	3609.23	12.18	592.649	4	1	NA	NA
KX008	PD48402b_lo0217	HSC	76	F	2747.47	13.83	397.32	2	0	NA	NA
KX008	PD48402b_lo0218	HSC	76	F	6058.67	10.85	1116.81	1	0	NA	NA
KX008	PD48402b_lo0219	HSC	76	F	3486.93	13.28	525.14	1	0	NA	NA
KX008	PD48402b_lo0220	HSC	76	F	3126.58	14.06	444.748	1	0	NA	NA
KX008	PD48402b_lo0221	HSC	76	F	3149.85	11.36	554.551	1	0	NA	NA
KX008	PD48402b_lo0222	HSC	76	F	3576.3	14.59	490.24	0	0	NA	NA
KX008	PD48402b_lo0223	HSC	76	F	4547.96	15.18	599.204	7	0	NA	NA
KX008	PD48402b_lo0224	HSC	76	F	5849.6	13.52	865.325	2	0	NA	NA
KX008	PD48402b_lo0225	HSC	76	F	3546.14	11.47	618.333	0	0	NA	NA
KX008	PD48402b_lo0226	HSC	76	F	2381.31	13.8	345.117	3	0	NA	NA
KX008	PD48402b_lo0227	HSC	76	F	2895.78	11.39	508.478	1	0	NA	NA
KX008	PD48402b_lo0228	HSC	76	F	6281.66	13.95	900.596	1	0	NA	NA
KX008	PD48402b_lo0229	HSC	76	F	1521.48	14.33	212.349	5	1	NA	NA
KX008	PD48402b_lo0230	HSC	76	F	4553.64	13.96	652.384	3	1	NA	NA
KX008	PD48402b_lo0231	HSC	76	F	6665.03	13.74	970.164	3	0	NA	NA
KX008	PD48402b_lo0232	HSC	76	F	3548.16	13.18	538.416	2	0	NA	NA
KX008	PD48402b_lo0233	HSC	76	F	3784.16	12.96	583.975	1	0	NA	NA
KX008	PD48402b_lo0234	HSC	76	F	10494	11.91	1762.22	1	0	NA	NA
KX008	PD48402b_lo0235	HSC	76	F	2788.46	13.21	422.174	1	0	NA	NA
KX008	PD48402b_lo0236	HSC	76	F	3583.65	11.11	645.122	3	0	NA	NA
KX008	PD48402b_lo0237	HSC	76	F	4819.08	10.32	933.93	5	0	NA	NA
KX008	PD48402b_lo0238	HSC	76	F	4524.23	14.11	641.28	1	0	NA	NA
KX008	PD48402b_lo0239	HSC	76	F	4679	11.7	799.829	5	1	NA	NA
KX008	PD48402b_lo0240	HSC	76	F	4287.1	12.1	708.612	1	0	NA	NA
KX008	PD48402b_lo0241	HSC	76	F	4105.98	11.53	712.225	4	2	NA	NA
KX008	PD48402b_lo0242	HSC	76	F	1991.23	12.59	316.319	4	0	NA	NA
KX008	PD48402b_lo0243	HSC	76	F	3483.46	10.2	683.031	3	0	NA	NA
KX008	PD48402b_lo0244	HSC	76	F	3405.4	11.52	591.215	4	0	NA	NA
KX008	PD48402b_lo0245	HSC	76	F	2889.82	12.81	451.182	0	0	NA	NA
KX008	PD48402b_lo0246	HSC	76	F	3764.07	14.32	525.708	1	0	NA	NA
KX008	PD48402b_lo0247	HSC	76	F	3552.84	13.25	536.278	1	0	NA	NA
KX008	PD48402b_lo0248	HSC	76	F	2439.73	11.61	420.281	2	1	NA	NA
KX008	PD48402b_lo0249	HSC	76	F	8188.99	13.89	1179.12	4	0	NA	NA
KX008	PD48402b_lo0250	HSC	76	F	6041.01	11.46	1054.28	2	0	NA	NA
KX008	PD48402b_lo0251	HSC	76	F	3895.76	13.81	564.194	1	1	NA	NA
KX008	PD48402b_lo0252	HSC	76	F	2756.42	13.57	406.252	2	0	NA	NA
KX008	PD48402b_lo0253	HSC	76	F	1565.99	12.87	243.355	2	0	NA	NA
KX008	PD48402b_lo0254	HSC	76	F	7244.34	14.03	1032.69	5	0	NA	NA
KX008	PD48402b_lo0255	HSC	76	F	5383.06	12.13	887.561	2	0	NA	NA
KX008	PD48402b_lo0256	HSC	76	F	3766.09	12.36	609.4	4	0	NA	NA
KX008	PD48402b_lo0257	HSC	76	F	1946.03	13.3	292.636	0	0	NA	NA
KX008	PD48402b_lo0258	HSC	76	F	4415.22	13.54	652.174	2	0	NA	NA
KX008	PD48402b_lo0259	HSC	76	F	2838.3	11.78	481.885	1	0	NA	NA
KX008	PD48402b_lo0260	HSC	76	F	4481.73	14.85	603.6	2	0	NA	NA
KX008	PD48402b_lo0261	HSC	76	F	3503.45	12.01	583.422	2	0	NA	NA
KX008	PD48402b_lo0262	HSC	76	F	5000.77	14.13	707.823	3	0	NA	NA
KX008	PD48402b_lo0263	HSC	76	F	5447.19	13.46	809.389	3	0	NA	NA
KX008	PD48402b_lo0264	HSC	76	F	2533.51	13.19	384.156	5	1	NA	NA
KX008	PD48402b_lo0265	HSC	76	F	4256.19	18.81	452.545	3	1	NA	NA
KX008	PD48402b_lo0266	HSC	76	F	2141.96	13.05	328.27	4	0	NA	NA
KX008	PD48402b_lo0267	HSC	76	F	996.36	9.28	214.733	1	0	NA	NA
KX008	PD48402b_lo0268	HSC	76	F	2833.88	12.05	470.354	3	0	NA	NA
KX008	PD48402b_lo0269	HSC	76	F	4126.82	11.75	702.437	6	0	NA	NA
KX008	PD48402b_lo0270	HSC	76	F	4538.63	12.65	717.57	4	1	NA	NA
KX008	PD48402b_lo0271	HSC	76	F	3994.05	13.15	607.46	0	0	NA	NA
KX008	PD48402b_lo0272	HSC	76	F	4053.59	13.01	623.15	0	0	NA	NA
KX008	PD48402b_lo0273	HSC	76	F	7456.91	10.65	1400.36	2	0	NA	NA
KX008	PD48402b_lo0274	HSC	76	F	1639.99	13.09	250.571	5	0	NA	NA
KX008	PD48402b_lo0275	HSC	76	F	3634.64	12.54	579.687	5	0	NA	NA
KX008	PD48402b_lo0276	HSC	76	F	4011.48	13.94	575.535	3	1	NA	NA
KX008	PD48402b_lo0277	HSC	76	F	3438.45	12.61	545.353	1	0	NA	NA
KX008	PD48402b_lo0280	HSC	76	F	4128.38	13.76	600.055	5	0	NA	NA
KX008	PD48402b_lo0281	HSC	76	F	3796.15	12.04	630.59	2	0	NA	NA
KX008	PD48402b_lo0282	HSC	76	F	3483.66	16.84	413.736	1	0	NA	NA
KX008	PD48402b_lo0283	HSC	76	F	4797.14	14.76	650.019	1	0	NA	NA
KX008	PD48402b_lo0286	HSC	76	F	5701.22	16.75	680.743	2	1	NA	NA
KX008	PD48402b_lo0287	HSC	76	F	4968.41	14	709.773	2	0	NA	NA
KX008	PD48402b_lo0288	HSC	76	F	3263.85	15.24	428.327	5	1	NA	NA
KX008	PD48402b_lo0289	HSC	76	F	6040.85	18.69	646.426	3	1	NA	NA
KX008	PD48402b_lo0292	HSC	76	F	4981.38	12.31	809.323	5	0	NA	NA
KX008	PD48402b_lo0293	HSC	76	F	4731.54	14.04	674.009	5	0	NA	NA
KX008	PD48402b_lo0294	HSC	76	F	2915.92	14.54	401.089	4	0	NA	NA
KX008	PD48402b_lo0295	HSC	76	F	6294.27	17.78	708.017	1	0	NA	NA
KX008	PD48402b_lo0298	HSC	76	F	3822.95	14.12	541.494	1	1	NA	NA
KX008	PD48402b_lo0299	HSC	76	F	2338.73	12.53	373.301	1	0	NA	NA
KX008	PD48402b_lo0300	HSC	76	F	1530.52	13.89	220.377	3	0	NA	NA
KX008	PD48402b_lo0301	HSC	76	F	4347.35	15.22	571.268	1	0	NA	NA
KX008	PD48402b_lo0304	HSC	76	F	5955.12	12.74	934.87	2	0	NA	NA
KX008	PD48402b_lo0305	HSC	76	F	4381.09	15.64	560.242	7	0	NA	NA
KX008	PD48402b_lo0306	HSC	76	F	4224.55	16.39	515.503	3	0	NA	NA
KX008	PD48402b_lo0307	HSC	76	F	3365.74	15.39	437.393	2	0	NA	NA
KX008	PD48402b_lo0310	HSC	76	F	5473.07	14.31	764.929	3	0	NA	NA
KX008	PD48402b_lo0311	HSC	76	F	4125.91	13.72	601.445	2	0	NA	NA
[truncated: 99 more rows]
