# Supplementary material for: Mitochondrial DNA mosaicism in human normal somatic cells
Source: Research Square preprint supplement (doi:10.21203/rs.3.rs-3602675/v1), 2023-11-21
Supplement: Supplementary file 9 [file a4a28c7088dd29c5b3b7fcbf.xlsx]

## Sheet: Sheet1
Supplementary Table 7. Hotspot mutations classified in this study
The following metadata is reported for each hotspot mutation: CHROM = chromosome; POS = position; REF = reference allele; ALT = alternative allele; cloneN = the total number of clones with the identified hotspot mutation; patientN = the total number of individuals with any clone harboring the hotspot mutation; patientN_multiclone = the total number of individuals with at least two clones harborin…
CHROM	POS	REF	ALT	cloneN	patientN	patientN_multiclone	mutation type	Dloop (0=no, 1=yes)	Dloop_subtype	Homopolymer (0=no, 1=yes)	Homopolymer_subtype	UV dependent (0=no, 1=yes)	Age dependent (0=no, 1=yes)
MT	12417	CA	C	41	15	8	Indel	0	NA	1	A homopolymer	0	1
MT	414	T	G	32	4	4	SNV	1		0	NA	1	1
MT	3244	G	A	31	21	5	SNV	0	NA	1	C homopolymer	0	0
MT	2623	A	G	31	11	5	SNV	0	NA	0	NA	0	1
MT	189	A	G	20	13	3	SNV	1	HVR2	0	NA	0	1
MT	1082	A	G	18	9	5	SNV	0	NA	1	C homopolymer	0	0
MT	11031	GA	G	18	9	4	Indel	0	NA	1	A homopolymer	0	1
MT	65	TG	T	17	11	4	Indel	1	HVR2	1	G homopolymer	0	0
MT	16129	G	A	16	8	4	SNV	1	HVR1	0	NA	0	0
MT	709	G	A	16	11	3	SNV	0	NA	0	NA	0	1
MT	204	T	C	16	9	5	SNV	1	HVR2	0	NA	0	0
MT	9445	G	A	15	12	3	SNV	0	NA	0	NA	0	0
MT	146	T	C	14	7	3	SNV	1	HVR2	0	NA	0	0
MT	3242	G	A	14	6	4	SNV	0	NA	0	NA	0	0
MT	103	G	A	13	7	3	SNV	1	HVR2	0	NA	0	0
MT	182	C	T	12	12	0	SNV	1	HVR2	0	NA	0	0
MT	11866	A	AC	12	11	1	Indel	0	NA	1	C homopolymer	0	0
MT	7465	A	AC	12	10	2	Indel	0	NA	1	C homopolymer	0	0
MT	2833	A	G	12	8	2	SNV	0	NA	1	C homopolymer	0	0
MT	13327	A	G	12	7	3	SNV	0	NA	1	C homopolymer	0	1
MT	10290	G	A	11	11	0	SNV	0	NA	1	C homopolymer	0	0
MT	16034	G	A	11	9	2	SNV	1	HVR1	0	NA	0	0
MT	11711	G	A	11	8	2	SNV	0	NA	1	C homopolymer	0	0
MT	10946	A	AC	11	7	2	Indel	0	NA	1	C homopolymer	0	0
MT	13230	CA	C	11	5	3	Indel	0	NA	1	A homopolymer	0	0
MT	16039	G	A	10	8	2	SNV	1	HVR1	0	NA	0	0
MT	13369	T	C	9	6	2	SNV	0	NA	0	NA	0	1
MT	13093	G	A	7	5	2	SNV	0	NA	0	NA	0	1
MT	195	T	C	7	6	1	SNV	1	HVR2	0	NA	0	1
MT	11038	A	C	6	2	2	SNV	0	NA	0	NA	0	1
MT	2129	GA	G	5	3	1	Indel	0	NA	1	A homopolymer	0	1
MT	6620	T	C	4	2	1	SNV	0	NA	0	NA	0	1
